# Supplementary material for: Transcriptomic Analysis of the Spleen of Different Chicken Breeds Revealed the Differential Resistance of Salmonella Typhimurium
Source: Genes (Basel). 2022 May 2;13(5):811. doi: 10.3390/genes13050811 (PMC9142047; doi:10.3390/genes13050811)
Supplement: Supplementary file 1 [file genes-13-00811-s001.zip › Supplementary Tables.xlsx]

## Sheet: Table S1
Table S1: RNA sequencing Summary
Sample	Clean Reads Pairs	Clean base(bp)	Length	Q20(%)	Q30(%)	GC(%)
S3001	22269662	6680898600	150;150	98.1;97.1	94.9;92.8	50.9;50.8
S3002	22509546	6752863800	150;150	97.9;96.6	94.6;91.8	50.4;50.4
S3003	24864485	7459345500	150;150	98.3;97.5	95.4;93.6	50.5;50.3
S3004	23680343	7104102900	150;150	98.1;96.9	94.9;92.3	50.6;50.6
S3005	22198622	6659586600	150;150	97.3;96.3	93.2;91.0	51.6;51.6
S3007	24158957	7247687100	150;150	97.4;95.9	93.2;90.1	48.7;48.9
S3008	22446865	6734059500	150;150	97.6;96.4	93.7;91.0	50.3;50.4
S3009	22389630	6716889000	150;150	97.6;96.3	93.7;90.9	52.5;52.6
S3010	22075005	6622501500	150;150	97.6;96.2	93.7;90.6	50.2;50.2
S3011	24041946	7212583800	150;150	97.7;96.9	93.8;92.0	49.9;49.8
S3013	20711417	6213425100	150;150	97.3;96.0	92.9;90.3	49.8;49.9
S3014	22842194	6852658200	150;150	97.5;96.3	93.7;91.1	52.9;53.0
S3015	22085376	6625612800	150;150	97.5;96.5	93.3;91.2	50.7;50.7
S3016	19948484	5984545200	150;150	96.9;95.0	91.8;88.0	49.3;49.9
S3017	23855784	7156735200	150;150	97.7;96.5	93.8;91.2	50.5;50.5
S3018	22495643	6748692900	150;150	97.5;96.4	93.4;91.0	50.8;50.8
S3019	22346364	6703909200	150;150	97.2;95.8	92.8;90.0	49.7;49.8
S3020	22939676	6881902800	150;150	97.4;96.3	93.3;90.9	49.0;48.9
S4001	23083816	6925144800	150;150	97.4;96.2	93.2;90.6	50.1;50.2
S4002	20201437	6060431100	150;150	97.4;95.8	93.3;89.8	49.6;49.6
S4003	23812411	7143723300	150;150	97.5;96.3	93.4;90.8	50.0;50.0
S4004	20213926	6064177800	150;150	97.7;96.6	93.7;91.3	49.8;49.7
S4005	19741209	5922362700	150;150	97.1;96.0	92.6;90.3	49.9;50.0
S4007	23536017	7060805100	150;150	97.5;95.9	93.6;90.0	50.0;50.1
S4008	22832155	6849646500	150;150	97.3;95.9	92.9;90.1	49.6;49.7
S4009	24260202	7278060600	150;150	97.6;96.3	93.8;91.0	50.4;50.5
S4011	22828322	6848496600	150;150	97.5;95.7	93.5;89.7	50.3;50.3
S4012	25538537	7661561100	150;150	97.3;95.9	93.0;90.0	50.2;50.4
S4013	24046984	7214095200	150;150	97.6;96.5	93.7;91.1	50.1;50.0
S4014	24577209	7373162700	150;150	97.5;96.4	93.5;91.0	50.6;50.7
S4015	23184797	6955439100	150;150	97.5;96.4	93.4;91.0	50.7;50.8
S4016	23059155	6917746500	150;150	97.4;95.9	93.3;90.0	50.0;50.0
S4018	23561191	7068357300	150;150	97.4;96.3	93.2;91.0	49.7;49.7
S4019	23609916	7082974800	150;150	97.4;96.0	93.3;90.3	49.8;49.7
S4020	22789105	6836731500	150;150	97.6;96.3	93.6;90.7	50.5;50.5
Supplement Table S1: RNA sequencing Summary

## Sheet: Table S2
Table S2: Differential Gene Expression data for BY and Cobb chicken
GeneID	Length	S3001	S3002	S3003	S3004	S3005	S3007	S3008	S3009	S3010	S3011	S3013	S3014	S3015	S3016	S3017	S3018	S3019	S3020	S4001	S4002	S4003	S4004	S4005	S4007	S4008	S4009	S4011	S4012	S4013	S4014	S4015	S4016	S4018	S4019	S4020	logFC	Pvalue	FDR
GeneID:395977	2650	0.8	0.84	1.48	1.47	0.34	0.44	0.47	1.31	1.93	1.83	0.76	0.79	4.23	0.9	0.42	2.07	0.44	0.59	4.27	0.76	6.78	3.69	1.06	2.37	0.49	2	1.92	2.01	3.46	1.49	1.97	1.36	1.3	1.07	4.58	1.02336	0.00100367	0.0207124
GeneID:101751681	1629	0.01	0.49	0.13	0.45	0.02	0.63	1	0.37	0.61	0.01	0.83	0.25	0.56	0.34	0.35	0.76	1.32	0.34	0.6	2	0.68	0.31	1.23	0.2	0.9	1.09	0.63	1.92	0.38	0.43	0.66	1.98	1.99	1.41	0.78	1.10378	0.00345735	0.0480938
novel.23242	976	0.12	0.49	0.53	0.36	0.01	0.12	0.61	0.02	0.54	0.11	0.26	0.03	0.57	1.22	0.45	0.55	0.1	0.49	2.39	0.33	1.72	1.6	1.21	2.66	1.29	1.85	0.64	1.75	3.28	3.61	1.82	1.19	2.83	0.95	3.33	2.38059	8.78118e-08	1.39916e-05
GeneID:107050008	2642	15.91	4.4	26.7	5.45	14.77	8.98	11.81	2.36	4.66	9.14	5.7	5.06	6.53	8.01	8.93	14.85	14.36	15.99	9.42	14.52	24.4	19.52	24.41	38.14	23.12	35.95	24.89	73.05	22.49	22.04	23.23	20.86	28.81	76.89	50.36	1.61092	4.39329e-08	8.46655e-06
novel.3404	3794	0.22	0.57	0.4	0.14	0.37	0.19	0.09	0.11	0.2	0.23	0.25	0.02	0.2	0.29	0.25	0.23	0.26	0.55	0.34	0.4	0.42	0.67	1.55	0.53	0.39	0.23	0.84	0.77	0.36	0.7	0.43	0.7	0.54	0.98	0.14	1.20173	1.0167e-05	0.000705579
GeneID:417603	4127	44.38	61.32	46.58	76.53	120.55	36.9	78.32	20.42	49.01	51.3	60.04	136.78	73.62	75.28	79.38	63.77	58.11	38.8	31.21	37.4	13.91	34.68	13.13	14.06	34.98	50.86	15.39	56.03	31	20.07	25.6	36.99	15.66	44.78	33.99	-1.1136	7.79635e-07	8.91881e-05
novel.2247	1583	0.97	0.4	0.09	1.38	0.01	1.67	0.1	0.19	0.1	0.4	0.8	0.09	0.1	0.45	0.47	0.78	0.15	0.15	0.25	0.17	0.14	0.05	0.11	0.15	0.02	0.14	0.05	0.01	0.14	0.14	0.14	0.03	0.13	0.11	0.05	-2.08699	1.97878e-05	0.00117921
GeneID:112532677	357	0.02	1.89	0.01	0.8	0.36	0.34	0.17	9.33	0.65	1.71	0.13	1.81	0.23	0.45	0.31	2.32	4.63	0.4	12.25	10.48	16.84	15.68	17.4	11.05	23.75	20.81	14.7	18.12	17.64	13.05	15.28	12.67	12.08	21.41	14.6	3.47034	3.58677e-10	1.76195e-07
GeneID:101752046	1208	0.02	0.02	0.4	0.9	0.06	0.2	0.01	0.06	0.03	0.08	0.05	0.01	0.07	0.21	0.05	0.04	0.03	0.33	0.31	0.21	0.73	3.1	1.02	3.42	2.7	1.5	2.78	1.62	2.21	1.37	2.1	1.78	3.85	2.94	3.46	3.85586	8.1545e-05	0.00336565
novel.134	9785	0.18	0.07	0.1	0.12	0.04	0.3	0.1	0.03	0.13	0.21	0.11	0.13	0.05	0.12	0.03	0.1	0.18	0.16	0.07	0.1	5.65	0.05	2.94	0.13	0.14	0.92	1.92	3.31	2.31	2.63	2.59	3.31	2.37	3.49	1.79	4.00935	1.33013e-20	6.66476e-17
GeneID:414337	774	10.66	5.71	10.73	6.41	5.11	11.91	9.8	13.55	9.35	8.79	16.03	7.67	10.7	11.06	7.18	13.79	7.66	9.4	113.65	169.04	87.96	139.12	104.1	79.28	76.32	82.27	63.77	94.05	73.93	162.43	102.3	147.72	180.89	114.32	127.54	3.52936	4.26748e-08	8.35259e-06
novel.15349	2632	0.14	0.41	0.19	0.1	0.44	1.07	0.16	0.05	0.19	0.42	0.32	0.08	0.19	0.37	0.25	0.48	0.65	1.16	0.11	1.4	1.37	0.85	2.52	0.58	1.02	0.18	0.46	1.57	0.54	0.54	0.75	1.83	1.51	1.74	0.67	1.48915	2.09439e-05	0.00121962
novel.739	2922	0.05	0.09	0.54	0.09	0.04	0.56	0.17	0.09	0.31	0.19	0.23	0.18	0.14	0.52	0.12	0.66	0.42	0.26	0.12	0.37	0.07	0.05	0.06	0.14	0.12	0.02	0.02	0.02	0.04	0.09	0.02	0.05	0.03	0.14	0.02	-1.6755	0.000974849	0.0202344
novel.4473	326	55.37	142.38	75.68	90.61	72.33	64.83	87.23	45.35	38.87	54.25	77.18	70.69	50.05	43.67	36.11	50.73	89.98	26.47	28.04	31.39	30.36	11.23	19.45	28.58	18.6	22.89	22.81	15.08	16.31	18	21.88	35.8	21.17	30.93	27.82	-1.46791	0.000762506	0.0170716
GeneID:395260	1026	5.87	6.38	8.31	9.46	1.68	7.96	5.54	2.88	3.15	8.58	4.99	2.76	7.97	4.88	6.53	10.62	7.6	5.1	8.26	7.5	21.18	15.27	14.58	12.63	26.53	15.06	16.41	12.02	25.06	23.53	17.72	16.68	15.34	20.32	15.73	-1.44397	3.48556e-07	4.35091e-05
novel.20671	807	0.51	0.49	0.64	0.51	0.82	0.48	0.72	0.97	0.83	1.15	1.13	0.72	0.73	0.49	0.92	0.78	0.54	0.63	0.8	0.05	0.01	0.09	0.06	0.08	0.02	0.03	0.02	0.07	0.05	0.04	0.08	0.02	0.04	0.1	0.03	-2.95352	0.00120464	0.0234679
GeneID:101747727	7141	0.03	0.02	0.03	0.06	0.01	0.02	0.04	0.02	0.02	0.01	0.02	0.02	0.05	0.01	0.03	0.03	0.03	0.04	0.22	0.03	0.16	0.11	0.18	0.11	0.15	0.71	0.14	0.11	0.24	0.25	0.27	0.14	0.11	0.15	0.21	2.82414	2.27447e-11	1.7807e-08
GeneID:421559	3752	2.58	5.31	3.67	1.3	2.42	4.79	2.55	2.39	3.43	3.12	4.6	1.27	1.57	4.25	1.91	2.49	5.31	5.92	2.39	9.26	6.44	2.01	9.67	7.23	9.13	3.97	5.88	12.5	6.28	4.95	5.22	7.69	9.33	8.87	5.31	1.06213	1.91753e-06	0.000187656
GeneID:768350	922	166.07	42.61	151.86	46.68	165.63	95.93	47.57	69.18	40.95	131.44	46.04	110.33	137.23	110.27	31.82	108.79	34.61	58.32	13.34	27.56	16.73	11.16	15.87	14.08	48.26	23.1	24.54	36.23	64.62	65.7	41.57	96.34	40.2	33.34	89.19	-1.18688	0.00130491	0.0246919
novel.7025	4278	0.02	0.03	0.01	0.02	0.03	0.04	0.03	0.06	0.08	0.01	0.02	0.06	0.02	0.02	0.01	0.02	0.07	0.02	0.02	0.14	0.13	0.12	0.19	0.14	0.35	0.11	0.26	0.27	0.79	0.09	1.2	0.13	0.02	0.12	0.25	3.00941	2.43883e-06	0.000225461
GeneID:414342	657	0.01	0.39	0.02	0.36	0.19	0.34	0.38	0.91	0.19	0.17	0.02	0.54	0.19	0.02	2.64	1.28	0.2	0.3	3.01	2.55	7.74	4.72	7.65	5.19	3.18	6.95	3.11	6.97	2.65	6.02	4.31	6.19	5.55	5.19	8.18	3.53732	4.9557e-06	0.0004005
novel.9542	1591	0.1	0.2	0.09	0.33	0.55	0.28	0.15	0.05	0.2	0	0.48	0.09	0.25	0.06	0.19	0.34	0.31	0.1	0.34	0.65	0.79	1.17	0.17	0.48	1.02	0	0.54	0.44	0.54	0.36	0.24	0.94	0.47	0.77	0.92	1.38366	7.07531e-05	0.00303524
novel.22154	1443	0.06	0.17	0	0.21	0.62	0	0	0	0.06	0.1	0.36	0.16	0	0.06	0.16	0.11	0.12	1.03	0.39	0.74	0.05	0.78	0.51	0.82	0.88	0.57	1.12	0.55	1.21	0.46	0.81	0.28	0.27	0.88	0.06	1.67703	0.000463737	0.0120269
GeneID:769024	3478	0.02	0.12	0.04	0.23	0.38	0.17	0.06	0.04	0.04	0.11	0.09	0.08	0.14	0.16	0.13	0.08	0.39	0.17	0.35	0.15	0.52	0.24	0.34	0.23	0.31	0.22	0.22	0.35	0.25	0.09	0.32	0.35	0.53	0.52	0.41	1.15506	6.49491e-05	0.00283857
GeneID:418660	1578	0	0.03	0.06	0	0	0.1	0.02	0.05	0.03	0.05	0.05	0.03	0.07	0	0.03	0.17	0.13	0.18	0.1	0.08	0.06	0.11	0.16	0.35	0.43	0.06	0.25	0.17	0.28	0.09	0.05	0.19	0.05	0.15	0.1	1.48639	0.000334797	0.00961573
GeneID:101749640	4520	0.02	0.13	0.09	0.13	0.08	0.09	0.02	0	0.1	0.08	0.11	0	0.03	0.13	0.06	0.1	0.1	0.38	0.24	0.03	0.47	0.26	0.12	0.26	0.39	0.04	0.14	0.44	0.02	0.22	0.15	0.28	0.19	0.6	0.37	1.47176	0.000239271	0.00765122
GeneID:101749404	2322	12.95	20.62	4.06	2.53	1.61	7.09	4.17	0.42	3.43	3.46	0.94	11.12	5.03	5.47	0.82	6.02	15.98	22.05	20.39	53.79	18.57	23.63	33.43	20.56	47.61	6.51	20.34	33.59	33.24	10.71	18.11	25.73	31.69	53.83	4.75	2.41418	4.95387e-17	1.24109e-13
GeneID:107050866	2637	1.57	1.72	5.81	2.49	1.06	1.74	0.9	0.58	2.53	2.05	3.13	0.84	2.22	3.22	0.76	1.98	2.29	4.02	2.42	1.58	11.81	7.61	1.26	23.37	9.98	6.7	10.74	5.51	3.54	22.95	33.72	2.39	10.43	31.7	18.78	1.49307	0.000202847	0.00675787
GeneID:100858050	3777	0.09	0	0.09	0.23	0.04	0.05	0	0.28	0.33	0.06	0	0.04	0.02	0.1	0.22	0.08	0.08	0.24	0.61	0.12	0.86	0.5	0.23	0.84	0.41	0.56	0.68	0.16	0.27	0.24	0.47	0.08	0.54	0.08	0.32	1.81941	6.71204e-06	0.000516451
GeneID:112530387	1838	1.37	0.68	0.19	1.17	0.31	1.73	0.12	0.54	0.5	1.16	0.94	1.07	0.25	0.95	0.59	1.44	0.66	1.4	0.45	1.65	1.69	3.86	1.96	1.34	1.38	0.3	3.74	1.14	0.85	1.01	0.41	2.05	2.37	6.45	1.63	1.09773	0.00111234	0.0221522
novel.23527	516	1.14	0.34	0.14	1.26	0.35	0	1.31	0	0	0	0.83	0	1.04	1.07	3.28	1.04	1.74	1.12	3.95	0.98	4.45	0.99	1.48	5.57	6.48	0.93	20.05	5.57	1.13	2.85	1.67	1.05	1.24	3.37	2.85	2.147	1.91648e-05	0.00115696
GeneID:101750160	982	38.2	16.12	236.7	62.48	189.27	4.17	39.25	56.12	23.15	23.8	39.86	10.09	25.39	69.19	21.71	40.13	16.38	7.92	15.88	10.89	31.44	45.66	4.19	6.15	10.69	24.12	13.61	11.15	17.24	16.49	6.78	3.56	6.09	6.56	20.36	-1.97979	1.6277e-06	0.000165096
GeneID:424833	2881	7.19	6.3	6.55	10.38	2.95	5.27	6.65	4.85	3.53	7.69	7.82	4.55	5.73	9.27	4.32	7.29	5.75	6.54	5.55	1.42	2.67	4.34	3.85	2.28	3.21	6.03	2.34	2.18	3.99	2.44	3.76	1.79	2.18	2.09	4.18	-1.01929	1.29159e-08	3.05265e-06
GeneID:425007	4153	0.03	0.04	0.03	0	0.01	0.04	0	0.03	0.02	0.06	0.03	0	0.01	0.02	0.04	0	0.06	0.03	0.02	0.08	0.04	0.02	0.02	0.13	0.09	0	0.04	0.24	0.01	0.06	0.03	0.07	0.08	0.15	0.03	1.31009	0.0030027	0.0437844
GeneID:421956	6750	0.1	0.16	0.15	0.04	0.06	0.7	0.03	0.06	0.14	0.2	0.38	0.06	0.22	0.32	0.22	0.3	0.42	0.27	0.03	0.5	0.39	0.72	0.67	0.69	0.64	0.02	0.54	0.49	0.6	0.21	0.49	0.64	0.54	0.73	0.21	1.12134	0.00122304	0.0236791
novel.7766	1078	0	0.17	0.15	0	0	0.38	0.33	0.08	0	0	0.09	0	0.08	0	0.08	0.08	0	0.32	0.33	0.09	0.16	1.51	0.19	0.08	0.41	0.15	0.25	0.67	0.3	0.23	0.32	0.17	0.08	0.41	0.74	1.78542	0.000870758	0.0187415
novel.10634	1462	0.51	1.01	0.49	0.63	0.11	0.72	0.6	0.53	0.44	0.6	1.19	0.58	0.22	1.82	0.36	0.7	0.23	0.86	0.22	0.12	0.41	0.18	0.69	0.11	0	0.2	0.39	0.44	0.05	0.05	0.21	0.6	0.11	0.27	0.38	-1.38785	3.26409e-05	0.00170011
GeneID:374095	3236	7.6	8.61	8.44	1.99	0.88	16.47	8.66	6.55	9.04	7.64	3.75	1.8	1.1	1.87	2.76	1.17	1.34	12.62	1.14	1.8	3.12	2.08	1.86	3.03	2.45	1.1	3.33	2.16	1.73	1.75	2.36	1.15	4.44	2.05	2.1	-1.41446	1.40227e-06	0.00014517
GeneID:112533210	1162	0.69	1.07	0.33	1.57	0.08	0.14	1.41	0	0.15	0.67	0.57	0.07	0.3	0.51	0.42	0.22	0.16	0.94	0.15	0	0.07	0	0.09	0.07	0.15	0.14	0.38	0.2	0	0.07	0.07	0.07	0.22	0	0	-2.50242	2.24108e-06	0.000211075
GeneID:423907	2740	0.37	0.37	0.44	0.24	0	0.15	0.23	0.18	0.03	0.19	0.03	0.07	0.05	0.31	0.27	0.29	0.08	0.68	0.15	0.11	0.02	0.03	0.03	0.15	0.15	0.02	0.08	0.09	0.05	0.02	0.12	0.08	0.1	0.19	0.15	-1.34401	0.000689279	0.015897
GeneID:426827	1536	0	0	0	0	0	0.24	0	0	0	0	0	0	0	0	0	0	0.08	0.34	0.08	0	5.7	0	1.19	0	0	0	0.07	0.45	0	0	0.04	2.04	0	6.95	2.77	5.01077	0.000584692	0.0142355
GeneID:427773	3267	50.64	28.64	46.83	13.16	14.57	37.3	49.31	20.72	44.21	62.58	29.25	25.43	17.85	19.26	51.85	40.89	33.32	32.22	12.9	21.63	16.39	15.67	30.59	26.41	10.33	14.31	10.08	11.87	15.24	13.58	27.54	12.38	12.96	11.84	14.36	-1.26579	6.2953e-09	1.79223e-06
GeneID:112531165	724	7.38	1.98	1.37	2.76	4.13	2.92	0.42	0.09	4.71	0.25	1.95	0.2	4.45	2	4.15	0.73	3.46	5.15	1.04	5.74	13.95	34.23	2.28	0.18	3.17	12.68	32.87	22.87	1.86	1.4	6.76	2.23	5.66	17.5	27.1	1.62272	8.47776e-05	0.00348186
GeneID:396417	3743	3.15	2.41	2.55	1.8	0.21	1.33	2.09	0.2	1.68	2.03	1.15	0.14	6.26	1.24	1.1	1.64	22.72	1.66	3.47	1.63	4.89	3.73	1.41	2.49	0.99	16.5	2.56	17.49	2.27	1.36	2.97	35.03	18.46	18.8	3.51	1.60696	0.000143419	0.00519981
GeneID:100859822	2270	0	10.9	0.11	7.8	0.03	17.03	18.67	0.11	0	9.41	10.45	5.25	20.11	0.04	18.04	0.03	13.23	9.14	0	0	0	0	0	0	0	0	0	0.04	0.03	0.01	0	0.06	0.03	0	0	-9.77427	1.1907e-22	1.49152e-18
GeneID:427800	1847	0	0.25	0.22	0.2	1.5	0.42	7	1.88	1.24	0.11	0.09	0	0.12	0.23	1.48	0.08	1.02	0.2	0.12	0.09	0.08	0.67	0.24	0.24	0.24	0.31	0.12	0.37	0.22	0.22	0.08	0.78	0.43	0.08	0.16	-1.76966	0.00152418	0.0275397
GeneID:112531155	1115	5.05	0	31.02	0	2.46	0.18	10.27	2.46	1.16	16.04	25.45	0	0.04	0	15.25	4.81	10.43	6.13	0.48	0.07	8.06	0.07	0	0	0	1.81	0	0	0.11	0.06	0	1.43	16.14	0	0	-2.80164	0.00361796	0.0495847
novel.18266	619	0	0.22	0	0.82	0.21	0.57	1.49	0.41	0	1.12	0.47	0	0	6.12	0.4	0	0.22	1.02	0	0	0	0	0	0.43	0.21	0	0	0.19	0	0	0	0	0.21	0.22	0.85	-2.66061	0.0023028	0.0367699
GeneID:415860	3555	2.17	1.54	3.98	5.18	1.07	3.17	1.36	6.91	2.19	6.47	1.62	3.71	4.22	1.25	6.08	2.3	2.09	10.79	1	0.53	0.37	0.94	1.3	2.29	1.46	1.97	4.12	0.47	1	0.71	2.92	0.93	2.9	0.39	1.54	-1.37451	1.07163e-05	0.000737571
novel.21692	1519	0.48	0.69	0.37	0.4	1	0.54	1.14	0.51	0.37	0.43	0.96	1.75	0.37	0.72	0.54	0.46	0.33	1.12	0.36	0.63	0.15	0.45	0.24	0.51	0.41	0.29	0.63	0.56	0.57	0.28	0.15	0.26	0.1	0.31	0.31	-1.02366	0.000320264	0.00932973
GeneID:416652	554	1230.14	2308.17	1330.6	3424.94	622.53	1751.19	4741.39	10784.5	5764.52	1836.37	506.56	1518.22	5337.57	747.79	807.65	1335.27	1790.57	565.69	10477.6	2050.04	13794.7	5203.15	5482.18	5158.17	2619.19	8111.58	7621.99	12914.9	7509.61	3753.51	6620.21	12211.8	6151.48	9408.38	10964.2	1.40717	3.17954e-05	0.00167347
GeneID:107055401	1000	1.33	0.93	1.39	3.47	2.05	1.45	1.87	3.87	1.97	0.5	0.6	1.42	1.69	0.73	0.64	0.64	0.5	0.54	2.21	0.71	0.7	0.49	0	0.91	1.55	0.26	0	0.5	0.05	0.34	0.45	0.93	0	0.55	0.18	-1.44638	0.000966334	0.0201008
novel.18911	648	0.55	0	0	0	0.75	0	0.49	0	0	0.24	0.42	0	0	0	1.12	0.19	0.4	1.04	0	0	0	9.49	0	0.19	0	9.7	0	11.29	0.68	0	0	0	0.57	19.51	12.63	3.85237	0.000280801	0.00850653
GeneID:112532629	2337	1.25	5.99	1.71	1.64	2.55	8.5	4.24	1.22	3.87	6.18	6.91	1.07	2.04	5.87	2.7	1.77	9.36	13.66	1.12	5.85	13.66	2.4	12.89	26.53	24.92	2.75	21.72	13.46	7.24	5.65	9.27	20.65	11.82	20.3	4.07	1.36848	5.88828e-05	0.00264697
novel.5248	1399	0.66	0.83	0.88	1.34	1.53	1.14	3.12	1.75	1.46	0.47	0.44	1.06	0.88	2.19	2.29	0.57	0.97	0.57	0.4	0.13	0.55	1.06	0	0.11	0.57	0.92	0.29	0.94	0.26	0.84	1.01	0.93	0.06	0.4	1.61	-1.15864	0.000945099	0.0198202
GeneID:112530112	32037	0.03	0.04	0.03	0.04	0.02	0.03	0.03	0.02	0.03	0.03	0.03	0.02	0.02	0.04	0.03	0.03	0.03	0.02	0.05	0.06	0.14	0.03	0.04	0.05	0.16	0.01	0.03	0.12	0.11	0.03	0.04	0.03	0.17	0.11	0.03	1.24153	4.83874e-06	0.000394869
GeneID:112530926	1882	0.04	0	0	0	0	0	0	0	0.15	0	0.03	0	0.05	0	0	0	0	0.09	0	1.32	0.5	0.99	0	0.16	0.65	0.62	0.6	0.14	0	0	1.1	0	0	0.16	0.16	4.44394	2.11928e-06	0.000201115
GeneID:107055725	2436	1.85	3.41	0.68	6.83	1.02	0.78	1.58	7.62	4.26	0.54	5.17	3.34	3.62	0	4.41	5.17	2.06	0.59	1.47	1.75	3.97	0.93	1.38	0.59	0.65	0.49	1.52	0.94	1.9	1	1.08	0.97	2.07	0.67	1.27	-1.28273	0.000786883	0.0175078
novel.2442	5114	1.11	0.73	0.89	0.41	0.67	1.94	0.56	0.54	0.22	0.95	0.81	0.38	0.89	0.56	0.8	0.77	1.21	1.72	1.27	1.93	2.15	1.77	1.51	2.22	2.09	0.59	2.32	2.86	1.56	1.78	1.76	1.13	2.37	2.23	2	1.06218	5.49585e-09	1.65889e-06
GeneID:112532474	3580	0.04	0	0.02	0	0	0.05	0	0	0.02	0	0	0	0.04	0	0	0	0.02	0.06	0	0.08	0.04	0	0	0.09	0.04	0	0.06	0.03	0.12	0.03	0.04	0.08	0.24	0.06	0.09	2.04275	0.00210757	0.0346462
GeneID:101747667	12722	0.04	0.13	0.01	0.02	0.07	0.28	0.1	0.01	0.06	0.04	0.09	0.01	0.04	0.02	0.07	0.04	0.36	0.49	0.16	0.3	0.06	0.39	0.2	0.32	0.31	0	0.07	0.58	0.04	0.18	0.23	1.05	0.04	0.68	0.18	1.3934	0.00330425	0.0465588
GeneID:421222	829	18.79	5.5	32.6	23.71	17.36	9.73	65.16	55.65	42.4	15.47	11.03	13.96	19.71	27.83	28.37	8.03	11.06	6.5	34.48	8.21	8.85	21.3	7.16	12.95	7.08	19.74	7.34	13.97	5.45	7.36	7.68	9.28	9.47	10.31	12.57	-1.01928	0.000627779	0.0149465
GeneID:107052719	2616	2.47	409.48	317.28	21.51	1.83	221.67	275.95	1.81	10.74	714.35	5.72	90.99	5.01	4.49	430.34	13.37	322.98	728.56	4.28	1.26	5.12	5.58	1.24	2.49	3.06	15.43	2.9	0.31	5.3	256.02	3.08	6.33	6.04	0.34	12.01	-3.32725	1.50886e-05	0.000969269
GeneID:107057287	1180	1.27	1.04	1	0.64	4.08	0.65	0.59	3.66	0.51	0.66	0.48	0.61	0.6	0.89	0.49	1.34	1.46	2.64	0.93	1.56	0.48	4.47	4.73	20.06	1.49	0.26	2.79	1.4	3.6	1.24	6.92	10.4	1.16	10.11	2.19	2.06055	5.74729e-06	0.000448557
GeneID:112530623	1074	74.37	46.33	26.32	103.92	440.99	69.47	268.64	369.85	61.9	21.9	97.54	397.67	69.09	63.14	118.27	40.49	48.69	41.13	234.89	62.21	42.55	72.48	93.68	49.99	30.81	100.77	51.61	11.36	24.01	27.29	29.73	38.58	54.58	43.86	77.15	-1.295	0.0010733	0.0216326
GeneID:112531412	707	0	0	0.11	0	0	0	0.04	0	0.04	0	0.17	0	0.08	0	0	0.03	1.24	0.65	0.35	0.73	0.22	0	0.37	1.56	0	0.08	1.47	0.21	3.02	3.6	0.14	13.3	1.86	6.2	1.93	4.37532	4.82124e-10	2.23679e-07
GeneID:430495	3233	21.98	18.71	9.17	31.02	9.43	17.04	14.15	30.46	8.22	13.43	22.71	45.9	15.86	11.68	10.88	21.4	11.51	11.5	12.14	6.5	8.91	7.51	13.77	7.82	10.19	5.12	11.34	9.25	8.24	8.52	11.57	8.08	7.15	3.97	6.49	-1.21568	3.90309e-08	7.78816e-06
GeneID:427907	2968	0.83	0.33	1.91	1.08	0.39	2.35	1.12	1.05	1.32	1.37	2.26	1.2	0.26	2.47	1.02	2.06	1.31	2.28	1.24	0.62	0.29	0.89	0.29	0.62	0.12	0.47	0.13	0.22	1.09	1.39	0.98	1	0.13	0.25	1.26	-1.12243	0.000444556	0.0116258
GeneID:418099	4201	0.02	0.02	0.11	0.09	0	0.04	0.03	0.02	0.05	0.01	0	0	0.05	0.07	0.1	0	0.05	0.07	0.35	0.05	0.04	0.18	0.19	0.13	0.08	0.13	0.1	0.07	0.06	0.11	0.06	0.05	0.09	0.1	0.11	1.38016	0.00042624	0.0113121
GeneID:107049998	1008	0.43	0.26	3.29	0.56	0.73	2.13	1.91	3.22	3.17	6.71	3.1	1.99	3.02	0.22	1.15	3.27	0	0.55	0.24	0.14	1.89	0	0.73	0.35	0	1.78	0.15	2.62	0.42	0	0.73	0.19	0.19	0.79	0	-2.37871	4.13345e-05	0.00202172
GeneID:112531876	4678	0.04	0.07	0.01	0	0.04	0.16	0.11	0	0.03	0.04	0.05	0.03	0	0.05	0.07	0.04	0.04	0.2	0.06	0.11	0.12	0.02	0.33	0.1	0.18	0.03	0.2	0.09	0.1	0.12	0.12	0.13	0.21	0.11	0.14	1.12902	0.00243278	0.0380915
GeneID:431597	9634	0.05	0.03	0.05	0.11	0.05	0.04	0.14	0.06	0.17	0.03	0.04	0.01	0.09	0.09	0.2	0.07	0.06	0.02	0.04	0	0.03	0.04	0.02	0.01	0.01	0.03	0.03	0	0	0.02	0.01	0.05	0.07	0.02	0.03	-1.70731	1.26855e-05	0.000838552
GeneID:417440	5773	6.85	6.93	16.47	22.09	6.24	5.92	39.11	11.29	22.08	7.02	5.48	3.46	16.18	8.68	27.21	5.03	5.47	7.05	12.03	2.75	3.47	6.23	3.94	5.2	3.35	21.99	4.82	6.63	3.9	2.4	4.5	7.41	5.73	3.49	9.62	-1.01756	0.00113731	0.0225599
GeneID:420621	4870	0.06	0.07	0.07	0	0.04	0.06	0	0.03	0.04	0.04	0.06	0	0.04	0.1	0.03	0.05	0.07	0.04	0.04	0.14	0.04	0.02	0.32	0.08	0.08	0.07	0.06	0.12	0.03	0.1	0.04	0.06	0.07	0.25	0.35	1.26675	0.00130302	0.0246746
novel.20719	634	3.04	16.46	5.52	7.56	0.81	1.81	2.3	2.7	1.17	5.31	10.14	0.73	11.82	21.94	1.87	8.2	5.51	2.05	0	0	1.5	0	11.5	0.3	0.68	1.67	0.15	3.41	0.62	0.42	0.88	0.63	2.1	1.52	1.17	-2.07099	0.000133052	0.00490919
GeneID:112529924	1172	50.71	13.7	85.85	14.1	33.41	21.63	27.04	12.98	13.25	25.13	16.08	13.92	20.2	15.23	30.39	40.03	34.47	32.66	79.51	26.99	67.77	102.07	9.11	79.16	184.9	138.15	88.03	96.73	36.6	109.58	164.13	27	20.66	172.38	215.63	1.4896	8.66831e-08	1.39916e-05
GeneID:100857549	777	2.75	3.61	0.5	0.67	7.51	0.95	1.54	4.96	3.99	0.49	3.21	5.12	1.93	0.75	0.39	2	2.81	1.49	0.56	0.76	1.26	0.59	2.65	0.38	0.41	1.05	0.57	1.9	0.74	0.13	0.55	1	1.23	1.4	3.44	-1.39405	0.000388375	0.0106251
GeneID:107052834	2042	0.11	0	0.06	0	0	0	0	0.07	0	0.4	0.2	0.03	0	0	0	0.07	0.15	0.04	0.04	0.52	0.24	0	0.25	0.5	0.29	0.03	0.15	0.46	0.56	0.43	0.18	0.33	0	0.43	0.5	2.11046	0.000347087	0.00981442
GeneID:107051692	2089	0	0	0	0.03	0	0	0	0	0.11	0	0	0	0	0	0	0	0	0	0	0.16	0	0.19	0	0.1	0.17	0.07	0.21	0	0.03	0.23	0	0	0	0.07	0.31	3.0858	0.0018554	0.0315141
novel.7050	281	9.57	114.74	3.7	0	33.29	135.81	20.54	9.1	0	7.16	18.1	18.23	4.87	4.49	0	4	19.72	64.67	0	5.33	5.21	6.24	22.54	0	4.37	0	25.15	0	3.66	0	9.86	4.54	5.47	5.51	4.76	-2.56322	0.00030378	0.00902799
GeneID:419215	2388	0	0.12	0.22	0.67	0.12	0.14	0.3	0.12	0.12	0.14	0.16	0.03	0.09	0.07	2.25	0.27	0.03	0.12	0.81	4.73	3.71	4.69	0.1	0.06	0.06	0.11	0.33	0	0.19	1.43	0.09	0.18	0	0.27	8.08	2.30785	0.000799378	0.0176292
GeneID:107055306	15486	0.08	0.06	0.06	0.13	0.02	0.05	0.04	0.02	0.05	0.17	0.01	0.04	0.09	0.04	0.07	0.09	0.05	0.04	0.28	0.11	0.11	0.09	0.08	0.1	0.06	0.68	0.12	0.19	0.09	0.11	0.2	0.11	0.11	0.11	0.16	1.34039	1.89144e-05	0.00114459
GeneID:107049019	1411	0.07	0	0.18	0	0	0	0	0	0	0.06	0	0	0	0.08	0	0	0	0.04	0.07	0	0.13	0.07	0.26	0.72	0.51	0	0.46	0	0.24	0.34	0.04	0	0.22	0	0	2.99623	0.000604267	0.0145704
GeneID:420094	5480	0.12	0.07	0.19	0.18	0.05	0.19	0.24	0.06	0.35	0.3	0.3	0.17	0.33	0.2	0.16	0.46	0.14	0.15	0.32	0.91	0.36	0.42	0.6	0.68	0.7	0.13	0.4	0.92	0.37	0.87	0.63	0.73	0.38	0.69	0.71	1.47242	2.15819e-10	1.15041e-07
novel.14287	2345	0.38	0.35	0.3	0.06	0.22	1.1	0	0.06	0.22	0.08	0.37	0.15	0.19	0.25	0.12	0.15	0.58	0.57	0.09	0.99	0.67	0.27	0.85	0.96	0.67	0.26	0.71	0.75	0.56	0.34	0.12	1.14	1.16	1.57	0.24	1.15282	0.00148703	0.0271083
novel.7805	1742	0	0.09	0.08	0.08	0	0.08	0.18	0	0	0	0.05	0	0	0.05	0.04	0	0	0	0.66	0.53	0.25	0.1	0.2	0.09	0	0.04	1.67	0.04	0	0	0.21	0	0.34	1.38	0.04	3.08022	9.13805e-05	0.00368064
GeneID:112531119	950	0.43	0.02	0.17	0.29	0.24	0	0.47	0.51	0	0.17	0	0	0	0.19	0.62	0.65	0.08	0.4	0.71	0.99	13.02	0.56	0.39	1.18	1.21	0.86	1.66	1.01	0.6	0.98	3.2	0.67	1.23	3.48	0.54	2.37587	9.57338e-08	1.47142e-05
GeneID:777408	875	0.54	0.48	0.31	0.33	0.91	0.86	0.06	0.83	0.34	0.36	0.36	0.32	0.74	0.3	0.35	1.5	0.62	0.45	0.26	0.74	0	0.37	0.53	0	0.29	0	0.2	0.18	0.61	0.24	0.26	0.2	0.26	0.2	0	-1.27508	0.00256346	0.0393761
GeneID:554220	1251	0.76	0.55	0.66	0.45	0.27	0.75	0.54	0.26	0.2	0.49	0.36	0.06	0.54	0.54	0.06	0.93	0.14	0.07	0	0.22	0.44	0	0.15	0.07	0.13	0.31	0.54	0.06	0.06	0.24	0.39	0.27	0.33	0.2	0.13	-1.09142	0.00360727	0.0494923
GeneID:107054695	498	1.22	1.34	1.32	0.73	0.05	0.13	1.26	0	0.38	0.75	0.31	0	0.14	0.16	0.26	0	0.15	1.63	2.15	0.69	5.77	1.76	0.98	2.11	1.15	2.37	2.74	1.69	2.54	2.38	0.64	0	1.84	9.51	4.07	1.67557	6.04412e-05	0.00268217
GeneID:428609	9265	0.04	0.06	0.03	0.02	0.01	0.04	0.01	0	0	0.07	0.01	0	0.04	0.02	0	0.04	0.07	0.01	0	0.09	0.07	0.02	0	0.15	0.05	0	0.16	0.13	0.07	0.02	0.04	0.86	0.39	0.09	0.11	2.48683	5.38716e-05	0.00248553
novel.16648	494	0.43	0	0.32	8.28	0	0	0.37	0	4.04	3.48	0.03	0	0.44	0	6.36	0.46	0.02	0.44	0	0	40.35	1.11	1.25	7.54	5.61	28.44	24.03	4.37	0.63	7.51	0.76	0.2	12.87	26.9	2.26	2.49927	2.77658e-05	0.00150331
GeneID:422810	1312	73.35	28.56	178.03	90.64	56.86	33.51	227.81	208.43	107.62	20.25	55.77	86.16	73.53	104.63	82.93	30.78	24.48	39.26	78.61	9.15	22.6	48.11	19.37	22.33	21.11	44.66	14.51	9.21	30.98	19.45	19.48	8.01	35.34	7.73	27.32	-1.81674	4.56763e-08	8.66915e-06
GeneID:112533549	1778	0	0.18	0.13	0.69	0.34	0.39	0.22	0	0.79	1.04	0.58	0.15	0.75	1.27	1.35	0.08	0	1.59	0.86	1.2	0.93	2.16	0.61	1.06	1.98	1.31	1.97	1.63	1.75	0.83	0.94	2.18	1.23	1.48	1.19	1.43092	0.000281357	0.00851308
GeneID:107054691	1200	2.03	2.59	4.34	4.22	1.36	6.25	3.1	1.7	8.85	4.87	1.4	0.8	8.67	1.05	1.75	4.21	3.79	2.47	3.23	3.26	15.1	3.94	2.63	6.39	3.75	18.93	6.58	24.63	2.58	4.22	2.95	35.63	22.05	13.63	4.35	1.64816	9.59377e-07	0.0001073
GeneID:395130	1293	0.79	1.43	0.22	0	1	1.02	0.06	0.63	0.07	0.29	1.05	0.66	0.65	0.15	0.06	0.89	1.36	1.13	0.06	4.74	1	0.55	0.95	2.82	2.92	0.84	2.22	1.68	0.82	2.38	2.31	1.42	1.87	2.18	3	1.44094	0.000199309	0.0066666
GeneID:107049003	2863	0.49	0.32	0.54	1.6	0.03	0.9	2.15	0.29	1.08	0.47	0.25	1.93	0.53	3.98	0.33	0.75	0.84	1.89	0.74	0.14	0.47	0.38	0.44	0.15	0.16	0.16	0.18	0.46	0.35	0.12	1.17	0.31	0.31	0.37	0.21	-1.27725	4.64628e-05	0.00219669
novel.8365	3274	0.39	0.25	0.87	0.46	0.24	0.13	0.35	0.16	0.28	0.18	0.38	0.16	0.09	0.36	0.28	0.21	0.25	0.39	1.98	0.2	0.38	0.7	0.71	0.61	1.47	0.37	0.59	0.05	0.53	0.89	0.82	0.32	0.47	0.41	0.23	1.01597	0.00144433	0.026587
GeneID:107054076	8977	0.09	0.06	0.03	0.03	0.12	0.09	0.11	0.1	0.1	0.04	0.07	0.03	0.09	0.01	0.13	0.05	0.1	0.05	0.06	0.06	0.02	0.03	0.06	0.06	0.11	0.02	0.02	0.06	0.02	0.02	0	0.02	0	0.03	0	-1.13793	0.00153435	0.0276714
GeneID:101749018	1645	1.06	2.48	0.88	1.01	0.4	0.84	0.58	0.25	0.35	1.11	1.6	1.02	1.18	0.84	0.58	1.99	0.76	0.46	0.54	0.09	0.22	0.32	1.17	0.2	0.43	1.43	0.41	0.27	0.31	0.35	0.5	0.06	0.41	0.24	1.12	-1.05592	0.00116006	0.0228842
GeneID:107051678	2397	0.34	0.28	0	0.03	0.12	0.4	0.09	0.18	0.09	0.14	0.07	0.14	0.21	0.03	0.14	0.3	0.19	0.29	0.45	0.33	0.54	0.13	1.04	0.5	0.33	0.03	0.78	0.67	0.44	0.22	0.41	0.45	1.13	0.47	0.36	1.43562	1.44953e-05	0.000935958
novel.4852	2703	0.08	0.45	0.16	2.82	0.08	0.02	7.36	0.31	0.05	0.76	0.11	0.3	2.03	4.09	5.21	0.1	0.14	0	0.23	0	0.15	1.2	0.18	0.05	0	7.41	0.13	0	0.05	0	0.05	0.23	0.03	0.23	1.42	-2.51951	0.00118122	0.0231559
GeneID:107053732	858	0.37	0.6	1.46	0.79	0	0	1.64	0.46	0.24	1.36	0.13	0	0.36	1.19	0.44	0.46	0.12	7.38	0.23	0.39	0.44	0	0.27	0.12	0.23	0.22	0.12	0.21	0.11	0.21	0.12	0.71	0	0.7	0.47	-1.88475	0.000959693	0.0200108
GeneID:427406	1810	452.69	228.73	368.06	355.32	316.33	225.1	264.06	351.74	247.25	449.45	247.65	527.5	193.74	426.06	199.56	202.61	109.41	245.12	49.09	113.45	204.32	164.69	100.41	120.58	119.79	264.27	211.97	125.69	146.02	140.26	160.73	107.7	174.92	124.66	185.54	-1.1445	6.2113e-09	1.78864e-06
novel.21224	825	0	0	0.15	0	0.29	0.19	0	0.1	0	0.47	0	0.36	0	0	0	0.24	0	0.15	0.43	0.25	0.63	0.33	0.74	1.1	2.49	0.37	0.17	0.07	0.3	3.53	0.28	0	0.33	0.37	0.17	2.59987	0.000342688	0.00975111
novel.6593	3490	1.11	10.23	1.22	0.43	1.28	1.46	1.04	0.4	0.98	3.04	2.82	8.84	3.54	4.02	0.25	1.23	7.95	6.7	15.15	12.69	0.07	28.16	1.43	58.98	15.98	0.3	108.26	0.57	9.11	48.19	21.35	1.7	0.14	0.55	0.83	2.77485	2.29088e-05	0.00130737
novel.6594	1646	0.46	0	0	0	0.65	0	0.37	0.8	0.45	0	1.37	0	0.49	0	0.19	3.2	0.81	1.48	3.96	2.23	0.04	4.75	1.69	26.85	11.01	0	28.24	0.6	0	7.45	4.56	1.25	0.24	0.44	0.25	3.35073	0.000241231	0.0076988
GeneID:107050073	1957	3.3	10.2	3.22	2.14	1.34	10.56	3.74	0.9	2.44	2.46	3.4	2.33	5.14	6.26	1.83	4.08	15.71	8.01	8.87	44.23	18.26	17.21	25.64	64.02	68.38	3.22	49.59	23.06	34.2	17.11	18.99	15.04	25.15	32.03	5.76	2.59883	9.23112e-17	2.10243e-13
GeneID:428068	4564	0.03	0.01	0.03	0.1	0	0.05	0.03	0	0.01	0.05	0.05	0.01	0.07	0.03	0.07	0	0.02	0.08	0.13	0.06	0.04	0.2	0.12	0.06	0.1	0.08	0.06	0.08	0.01	0.07	0.16	0.1	0.07	0.08	0.1	1.22983	0.000633036	0.0150042
GeneID:770434	864	0.75	0.36	0.62	0.52	0.12	0.56	0.37	0.11	0.35	0.1	0.51	0	0.12	0.69	0.65	0.9	0.72	0.34	0.34	0.39	0.44	0.12	0.13	0.23	0	0	0.12	0.22	0.41	0.21	0.23	0	0	0	0.06	-1.47463	0.00102175	0.0209648
GeneID:422411	6134	0.04	0	0.02	0	0	0	0.01	0.03	0	0.01	0.01	0	0.02	0	0	0	0.04	0	0.02	0.05	0.14	0.01	0.1	0.07	0.03	0	0.05	0.07	0.06	0.08	0.03	0.01	0.03	0.1	0.02	2.19125	6.66619e-05	0.00287945
GeneID:769673	3637	0.11	0.11	0.07	0.02	0.04	0.08	0	0.15	0.08	0.28	0.1	0	0.08	0	0	0.1	0.16	0	0.21	0.05	0.24	0.18	0.06	0.18	0.45	0.07	0.13	0.21	0.28	0.07	0.2	0.14	0.48	0.23	0.03	1.26284	0.0035318	0.0487774
GeneID:420156	2803	0.16	0.43	0.02	0.17	0.17	0.29	0.03	0.08	0.18	0.24	0.39	0.12	0.16	0.21	0.19	0.61	0.05	0.45	0.14	0.54	0.38	0.29	0.85	0.54	0.42	0.32	0.47	1.29	0.21	0.23	0.15	0.7	0.67	1.26	0.5	1.13724	0.000363207	0.010133
GeneID:101750820	5870	0.57	1.75	0.93	0	0	3.18	1.61	0.1	2.34	1.09	0	0.21	1.6	1.53	0.04	0.8	0.11	0.17	0.11	0.08	0.07	0.14	0	0.06	0.13	0.04	0.03	0.03	0.05	0.01	0	0.04	0.1	0.14	0.03	-4.06865	2.54385e-11	1.93125e-08
GeneID:112531256	942	3.22	7.8	12.25	9.12	0	6.71	3.4	2.6	7.29	9.16	4.74	1.54	8.04	6.96	4.52	9.11	0.46	2.73	2.18	1.93	0.35	2.87	0.87	5.71	2.74	0.2	0.39	2.31	0.45	0.94	2.85	0.43	0	1.35	3.56	-1.76114	3.63789e-05	0.00184494
GeneID:418525	6569	0.02	0.02	0	0.02	0.02	0	0.01	0	0	0.01	0.02	0.02	0	0.03	0.01	0.06	0.01	0.05	0.03	0.04	0.03	0.02	0.05	0.02	0.18	0.03	0.06	0.01	0.05	0.05	0.07	0.05	0.03	0.01	0.03	1.3436	0.00335014	0.0469414
GeneID:101747255	2668	0.11	0.14	0.05	0.03	0.11	0.2	0.19	0	0.08	0.12	0	0.05	0.05	0.21	0.05	0.26	0.14	0.26	0.05	0.41	0.37	0.12	0.4	0.55	0.32	0.25	0.37	0.21	0.46	0.56	0.31	0.19	0.43	0.47	0.16	1.47445	1.85739e-06	0.000183876
novel.20647	368	0	2.43	0.75	0	0	0	0	0	0	0	1.26	0	0.99	0	0.05	0.35	2.72	2.94	1.05	4.03	0	2.16	10.91	0.58	9.96	5.19	4.36	2.13	10.94	2.78	10.16	0	0.06	0	0	2.88326	0.00201148	0.0334529
GeneID:107057251	2490	0.02	0.34	1.03	0.12	2.14	0.75	0	0.87	0.15	0.14	0.05	0	0	0.68	0.17	0.17	0.27	3.38	0.63	0.51	0.1	7.63	3.22	8.39	0.33	0.24	2.09	0.27	4.41	0.42	3	25.63	0.16	16.44	1.71	3.45554	1.83511e-06	0.000182441
GeneID:100859246	10416	0.04	0.05	0.03	0.02	0.01	0.04	0.03	0.02	0.03	0.02	0.05	0.02	0.01	0.06	0.02	0.08	0.06	0.07	0.01	0.09	0.02	0.02	0.02	0.13	0.13	0.03	0.14	0.13	0.16	0.07	0.15	0.14	0.14	0.19	0.22	1.28303	3.2288e-05	0.00169228
novel.16614	2427	7	6.48	9.51	0.05	0.1	4.22	1.3	5.61	2.72	0.05	3.93	5.85	6.82	7.92	6.68	6.12	2.84	2.72	2.21	0.85	0.04	1.51	3.82	1.16	1.68	2.94	2.02	2.22	1.91	1.58	2.73	0.27	0.17	3.54	1.45	-1.41514	0.00213603	0.0349079
GeneID:424789	7244	0.28	0.25	0.02	0.03	0.11	0.15	0.01	0.16	0.15	0.57	0.19	0.02	0.22	0.06	0.06	0.41	0.27	0.34	0.01	1.4	0.13	0.07	0.28	0.97	0.55	0.12	0.23	1.57	0.12	0.25	0.59	0.64	0.2	0.64	0.27	1.29947	0.00310442	0.044853
novel.4146	725	0	0.16	1.02	0	0	0	0.31	0	0.71	0.16	0.38	0.15	0.71	0.8	0.2	0	1.54	1.28	1.01	3.05	1.78	0.9	0.18	2.29	0.18	0	0.76	1.7	0.28	1.27	1.69	2.82	2.18	2.45	0.47	1.68747	0.00102079	0.0209622
GeneID:112530945	1179	0	0	0.36	0	0	0	0.21	0.14	0	0.14	0.2	0	0.01	0.71	0.02	0	0	0.28	0.82	0.28	4.25	0.31	1.42	0.08	0.49	2.59	0.26	0	0.07	3.54	0.25	2.7	3.11	1.84	5.96	3.93528	4.70476e-08	8.73099e-06
GeneID:770747	4473	0.88	0.03	0.27	0.52	0.03	0.25	0.22	0.32	0.07	0.68	0.39	0.22	0.25	0.44	0.31	0.22	0.07	0.06	0.16	0.3	0.29	0.17	0.02	0.11	0.03	0.13	0.06	0.01	0.24	0	0.37	0.04	0.13	0.03	0.05	-1.34363	0.00253771	0.0391244
novel.8138	2880	0.25	0.79	0.11	0.07	0.17	2.27	0.07	0.31	0.22	1.04	0.26	0.07	0.22	0.14	0.51	0.31	4.24	0.6	1.19	1.64	1.35	1.19	2.31	2.26	4.3	0.05	2.07	3.64	1.27	1.89	1.93	0.9	2.84	0.48	0.91	1.43057	0.00124845	0.0239674
GeneID:107055318	8124	0.12	0.17	0.18	0.01	0.14	0.17	0	0.07	0.21	0.15	0.08	0.04	0.13	0.44	0.09	0.28	0.15	0.08	0.01	0.11	0.02	0.07	0.06	0.06	0.09	0.13	0.03	0.05	0.09	0.06	0.08	0.03	0	0.08	0.08	-1.25332	0.00106636	0.0215233
GeneID:107050560	3209	0.12	0.44	0	0.18	0.08	0.18	0.24	0.12	0.24	0.2	0.06	0	0.36	0.09	0.14	0.39	0.31	0.07	0.12	0.04	0	0.12	0	0.03	0	0	0.26	0.11	0	0	0	0.04	0.12	0.16	0	-1.70427	0.00313229	0.0449704
novel.17749	3405	0	0	0	0	0	0	0	0	0	0	0	0	0.02	0	0	0	0.02	0	0.1	0.47	0	0	0	0.71	0.58	0	0.42	0	0.28	0.28	0.56	0	0	0	0	5.32895	1.14949e-05	0.00078044
GeneID:112531460	859	0	0	0.24	0.04	0.12	0.13	0	0	0	0	0	0	0	0.13	0.04	0	0.08	0	0.07	0.22	0.21	1.36	0.42	5.38	0	0.04	0.8	0	1.79	0	1.15	5.09	0.34	6.9	0.26	4.54388	8.81162e-08	1.39916e-05
GeneID:771055	779	77.59	121.54	181.84	137.19	161.31	44.69	545.07	525.56	202	36.69	57.56	267.54	242.92	143.94	209.4	47.98	66.91	54.39	96.33	47.73	48.48	44.63	68.7	41.65	55.02	69.69	47.12	97.37	33.38	38.74	59.6	121.66	93.36	86.49	90.33	-1.5541	6.61073e-07	7.70319e-05
GeneID:107051636	3720	0.45	1.18	0.17	0.18	0.12	0.31	0.14	1.05	0.54	0.23	0.82	0.14	0.65	0.53	0.02	0.78	0.28	1	0.15	0.23	1.71	0.23	0.79	4.1	2.09	0.29	1.1	0.53	0.34	1.51	1.05	0.9	3.07	0.77	0.83	1.19443	0.00291814	0.0430554
GeneID:112533168	1237	0	0.63	1.15	0.41	0	0.35	0.25	0.77	0.49	0	0.17	0.39	0.43	0.33	0	0.42	0	0.35	0	0	0	0	0.16	0.07	0	0	0.14	0.12	0	0	0	0	0	0	0	-3.6394	2.8977e-06	0.000263029
novel.23452	493	1.51	1.31	2.13	1.07	3.05	5.64	0	0.95	2.35	4.27	1.15	1.68	1.92	0.84	6.16	0.66	1.13	4.23	2.24	7.56	6.41	11.89	1.28	17.63	5.26	5.56	5.16	6.83	3.52	15.75	5.03	1.07	5.18	8.49	3.28	1.48433	0.000102103	0.00400937
GeneID:428259	2477	0	0.18	0.05	0.03	0.06	0.03	0.09	0	0.03	0.13	0.03	0	0	0.03	0.08	0.03	0.09	0.31	0.06	0.16	0.11	0.28	0.17	0.25	0.17	0.05	0.17	0.05	0.11	0.21	0.22	0.09	0.14	0.11	0.34	1.22195	0.00265622	0.0403704
GeneID:107057257	1799	1.9	1.04	1.2	2.62	7.75	1.98	1.96	2.31	1.65	1.79	1.43	2.41	0.68	1.02	1	2.09	2.36	6.35	3.94	4.71	2.08	16.22	18.86	53.06	2.35	2.08	10.98	5.31	5.24	2.34	14.6	45.74	0.99	40.79	7.45	2.95051	3.01036e-11	2.15482e-08
novel.10707	1461	4.34	5.64	1.81	0.7	0.06	2.03	0.52	0.05	0.48	0.33	0.98	0.15	2.2	8.09	3.06	3.64	5.38	5.91	4.07	20.73	18.84	7	3.09	9.98	35.03	0.3	9.87	11.45	25.59	8.36	14.57	20.94	3.6	54.6	0.6	1.89839	1.04049e-07	1.578e-05
novel.6241	1321	0.9	0.64	0.34	0.54	0.63	0.23	0.12	0.12	0.13	0.34	0.07	0	0.13	0.29	1	0.25	0.78	1.28	1.5	1.38	1.18	0.94	1.73	0.55	1.24	1.23	0.88	1.46	0.79	1.2	1.22	1.44	0.48	1.23	0.68	1.31472	9.36616e-06	0.000664747
GeneID:423610	6497	0.45	0.59	0.23	0.26	0.57	1	0.24	0.25	0.85	0.36	0.32	0.13	0.67	0.25	0.42	0.64	1.6	0.92	0.31	1.33	0.85	0.51	2.06	1.73	1.18	0.27	1.62	1.89	0.49	0.61	0.96	2.4	1.4	1.87	1.06	1.09937	6.09684e-05	0.00269491
GeneID:112532635	1352	3.78	3.25	1.32	9.73	5.94	13.34	3.64	0.46	4.53	2.44	4.38	0.72	3.45	23.55	5.96	12.11	16.77	5.59	14.01	28.47	51.18	23.93	7.92	26.79	50.28	8.18	25.75	29	35.03	26.77	28.58	53.5	17.25	37.2	0.98	1.87505	3.05683e-06	0.00027449
GeneID:107049779	1963	0	0	0	0	0	0	0	0	0.04	0	0	0	0	0.14	0	0	0.15	0.37	0.37	0.04	0.06	0	0.45	0.31	0	0.04	0.08	0.25	0.19	0.13	0	0.87	0.05	2.17	0	3.01197	0.0015888	0.028189
novel.133	1855	0.36	0.14	0.24	0.56	0.17	0.5	0	0.09	0.15	0.08	0.33	0.26	0.12	0.11	0.08	0.33	0.37	0.2	0	0.08	0.12	0	0.26	0.23	0.22	0.11	0	0	0	0	0	0	0	0	0	-2.13345	0.000204459	0.00680253
novel.10263	819	0.65	0.52	0	0	0.76	0.46	0.13	0.37	0	0.23	0.14	0.49	0	0.43	0	0.37	0.13	0.86	0.13	0.84	0.48	0.4	1.16	1.13	0.25	0.36	0.38	0.57	0.45	1.15	1.24	1.93	1.11	1.26	1.01	1.27749	0.00171403	0.0296354
novel.11797	4397	0.3	0.81	0.43	0	0	1.17	0.97	0.04	1.34	0.42	0	0.07	1.14	0.58	0	0.44	0.03	0.04	0.03	0.02	0.04	0.05	0.02	0.1	0.02	0	0.08	0.05	0	0.01	0.03	0.15	0.01	0.07	0	-3.46804	9.39554e-08	1.453e-05
novel.23231	861	1.47	0.24	0.31	0.67	2.46	2.57	0.59	0.57	0.95	0.42	0.89	0.56	0.83	0.92	0.85	0.91	1.58	2.64	0.71	0	0	14.23	0.84	1.4	1.93	8.49	4.03	12.53	2.82	0.74	0.11	0.61	0.11	18.05	11.14	2.01069	0.000290497	0.00873689
GeneID:107051255	381	6.24	6.99	3.63	8.49	1.15	2.86	4.18	2.47	4.37	18.38	6.16	4.86	5.9	3.64	13.07	4.1	9.47	4.76	9.41	2.33	5.59	10.59	0.44	9.91	5.72	5.72	3.04	6.6	7.09	9.15	1.95	1.83	10.35	4.51	18.73	-1.94161	2.8025e-18	8.77637e-15
GeneID:107057109	958	0.1	0.63	0.27	0.28	0	0.19	0.32	0.48	0.4	0.2	1.86	0.41	1.01	1.14	0.19	0.1	0.31	1.15	0.49	2.38	0.75	0.71	1.02	1.42	1.83	0.37	1.4	0.1	1.03	1.44	2.04	1.39	0.83	2.71	2.81	1.28899	0.00108981	0.0218774
novel.471	800	0	0	0	0	0	0	0	0	0	0	0.36	0	0	0.22	0.76	0.32	0	0	4.06	0.5	0.72	0	0	4.68	0	0	16.46	2.73	16.22	0.82	1.58	0.38	3.09	1.98	0	5.18716	1.54432e-07	2.22356e-05
novel.17447	805	11.12	22.65	16.61	7.16	1.12	22.33	23.71	2.7	8.5	24.14	6.76	17.47	6.95	4.7	18.66	9.82	20.47	4.21	2.3	5.3	7.84	2.16	4.71	4.58	6.7	12.66	6.55	6.84	4.45	3.65	4.72	4.85	7.38	2.56	8.11	-2.04614	1.81221e-07	2.55063e-05
GeneID:112531028	797	0	0.37	0	0	0.38	0.12	0.26	0	0	0	0.14	0.13	0	0	0	0	0	0	0.19	0.87	0	0.42	0.15	0.71	0.39	0.12	0.13	0	0.35	1.76	0	0.29	0.39	0.3	0.78	2.54784	0.000544511	0.0135334
GeneID:422305	1212	9.54	6.89	7.59	11.15	7.75	6.15	5.61	16.1	8.95	6.34	17.38	25.14	8.6	8.24	4.82	7.26	6.97	4.66	7.35	3.49	5.3	4.16	3.23	2.91	4.92	4.14	3.75	2.46	4.96	4.79	2.53	4.03	3.4	2.08	5.29	-1.36354	3.38079e-09	1.13682e-06
GeneID:101750779	7792	0.03	0.08	0.07	0.02	0.04	0.05	0.07	0.02	0.01	0.06	0.04	0.04	0.02	0.07	0.06	0.03	0.04	0	0.01	0	0.02	0.01	0.03	0.02	0.03	0.03	0.02	0.01	0.04	0.01	0.03	0.02	0	0.02	0.03	-1.13169	0.0022118	0.0357613
GeneID:374101	1117	1.54	0.56	0.21	0.23	0.87	1.32	2.43	1.69	2.55	0.28	0.26	0.91	0.56	0.89	0.67	0.54	1.15	0.69	0.86	0.43	0.74	0.08	0.72	0.47	0.16	0.22	0.56	0.5	0.36	0.36	0.84	0.48	0.15	0.62	0.39	-1.1605	0.000575297	0.014073
GeneID:112532659	947	8.93	19.49	9.26	5.24	1.19	13.69	5.54	18.73	8.67	14.55	2.87	8.42	12.82	5.08	7.31	10.3	0	7.62	2.49	11.7	0	4.24	0.5	4.89	3.96	0	0	3.12	0.5	0	2.19	0.46	0	4.7	2.64	-1.99986	0.00125584	0.024054
GeneID:112530522	6539	0.01	0.02	0	0	0	0	0.01	0	0	0	0.01	0	0	0	0	0	0.04	0.01	0	0.07	0.04	0.01	0.04	0.08	0.02	0	0.06	0.06	0.01	0.03	0	0.04	0.08	0.15	0.02	2.75396	7.92348e-05	0.00328111
GeneID:112529944	864	1.05	1.83	0.25	4.17	1.57	3.83	2.07	3.56	2.78	2.3	3.46	7.77	3.35	1.78	1.23	0.89	2.7	1.08	5.71	1.76	6.63	10.71	0.61	8.82	6.15	7.04	2.54	0.73	0.89	12.08	12.91	0.38	13.42	11.06	9.41	1.1541	0.00329469	0.0464763
novel.23624	552	20.92	7.72	2.17	4.5	13.87	26.87	2.76	8.54	3.72	7.38	10.02	11.41	13.85	7.54	6.91	2.66	4.65	12.63	3.85	3.85	3.99	2.82	6.58	4.23	4.22	7.32	4.87	5.05	3.11	4.47	5.62	2.9	7.36	3.98	4.73	-1.13389	2.10305e-05	0.00121962
GeneID:101747386	618	0	0	1.13	13.33	0	0	5.34	2.28	2.2	2.8	1.87	4.1	6.32	1.18	33.44	3.11	0	0	2.56	0	0	2.44	0	0.22	0	38.69	0	0	0.75	0	0	0	0	0	0.86	-3.29935	0.000668123	0.0156127
GeneID:422009	2381	0.06	0.09	0.16	0.2	0.34	0.14	0.15	0.62	0.27	0.39	0.2	0.06	0.37	0.07	0.31	0.12	0.19	0.15	0.03	0.3	0.14	0.23	0.73	2.84	0.72	0.03	0.88	0.3	0.36	0.55	0.35	0.45	1.02	0.59	0.69	1.32946	0.000711967	0.0162029
GeneID:418057	3219	0.51	3.57	1.24	0.37	1.18	3.36	0.86	0.55	0.3	1.9	3.28	1.24	0.39	1.95	0.61	2.02	3.96	3.33	0.19	0.74	0.87	0.07	1.27	0.38	1.09	0.38	0.52	1.83	0.26	0.39	0.17	0.47	0.77	0.8	0.89	-1.44912	2.74854e-05	0.00149694
GeneID:100858620	654	1.1	0	0.73	0	1.64	0	0	0.83	0	0.7	0.99	0	0.21	0	0	0	0.1	0	1.76	1.99	0.37	6.24	11.81	1.96	5.49	5.93	4.34	4.6	3.99	4.56	4.58	2.26	3.89	2.12	2.24	4.7206	1.10085e-20	6.66476e-17
novel.23674	1280	40.74	39.49	53.46	52.25	22.79	20.38	37.19	7.31	26.7	27.61	19.83	37.93	109.23	21.67	56.2	9.61	16.79	40.92	47.86	33.34	36.53	57.08	53.76	44.68	68.52	50.05	62.15	16.97	35.52	38.78	57.4	22.45	70.62	75.14	73.64	1.0317	1.33114e-08	3.11673e-06
GeneID:428240	2916	0.07	0.1	0.02	0.02	0	0.02	0.05	0.12	0	0.07	0.13	0.09	0.02	0.08	0.05	0.07	0.13	0.05	0.14	0.03	0.38	0.42	0.33	0.12	0.22	0.02	0.58	0.58	0.11	0.07	0.07	0.14	0	0.47	0.36	1.8766	3.0852e-05	0.0016358
GeneID:100859813	12005	0.05	0.06	0.03	0.05	0.01	0.09	0.11	0.07	0.09	0.2	0.08	0.02	0.07	0.14	0.17	0.08	0.11	0.13	0.12	0.23	0.41	0.13	0.58	0.36	0.31	0.12	0.35	0.22	0.32	0.16	0.31	0.21	0.3	0.12	0.1	1.53093	8.27014e-09	2.13678e-06
novel.9231	6638	0.03	0.03	0.03	0.05	0.05	0.06	0.01	0.02	0	0.13	0.04	0	0.01	0.03	0.02	0.03	0.02	0.02	1.5	0.98	0.05	0.74	0.05	0	1.18	0.01	0.07	0.09	0.65	0.04	0.85	0.08	0.09	0.04	0.01	3.53389	5.63484e-09	1.68059e-06
GeneID:112531599	697	0.01	0	0	0	0	0	0	0	0	0.04	0	0	0	0.67	0.59	0.61	0	0	0	0	0.02	0.03	0	0	0.1	0	0	0.22	0	0	0	3.81	0	0.93	2.96	3.46702	0.00342112	0.0476958
GeneID:425940	588	7.1	13.01	8.86	11.84	10.33	26.02	7.18	137.57	10.53	16.31	8.73	28.23	10.78	4.31	16.02	10.3	32.18	65.48	25.47	27.33	16.33	8.04	20.65	157.47	58.3	13.68	93.46	7.74	12.77	45.85	83.98	26.67	60.76	24.21	11.38	1.24186	0.00243422	0.0380915
GeneID:395935	1613	10.73	7.29	19.51	20.36	8.7	11.49	35.23	25.48	20.24	9.74	8.33	17.7	15.98	21.73	29.61	10.36	6.73	30.63	9.16	3.66	4.12	14.1	3.8	3.88	5.83	5.39	6.62	4.45	7.39	7.56	11.42	16.83	4.43	6.16	18.12	-1.24403	1.33757e-06	0.000141394
GeneID:112532187	8591	0	0.04	0.01	0.01	0.02	0.06	0.02	0.01	0.02	0.01	0.03	0	0.02	0.01	0	0.01	0.06	0.01	0	0.09	0.05	0	0.02	0.07	0.05	0	0.12	0.11	0.05	0.05	0.06	0.31	0.24	0.15	0.08	2.25475	1.52908e-05	0.000979746
GeneID:424835	6099	0.64	0.78	1.32	1.15	0.33	0.65	0.83	0.64	0.59	0.47	0.58	0.45	0.76	0.58	0.97	0.68	0.8	0.69	0.48	0.2	0.15	0.39	0.26	0.29	0.17	0.7	0.16	0.3	0.21	0.27	0.3	0.4	0.2	0.35	0.55	-1.24171	2.22472e-10	1.16116e-07
GeneID:107049793	1783	1.82	1.11	4.98	2.59	3.25	2.94	2.4	1.23	3.6	0.9	2.26	3.06	5.73	2.48	2.86	1.8	1.86	3.08	4.88	12.7	1.34	8.85	4.38	8.25	14.9	4.64	19.58	2.95	7.96	5.61	4.44	2.64	7.64	6.78	4.76	1.67684	2.6196e-10	1.33936e-07
GeneID:416933	586	84.29	86.32	64.24	45.13	157.64	89.12	83.06	181.63	66.78	64.65	74.51	150.21	96.47	85.11	61.55	35.75	58.57	92.39	38.65	54.92	50.24	32.48	80.83	46.2	49.59	60.96	38.16	27.85	45.99	36.99	38.76	42.75	67.33	32.03	51.49	-1.06778	9.90618e-08	1.51329e-05
novel.2552	2237	0.37	0.76	0.15	0	0.1	1.99	0.13	0.1	0.13	0.27	0.32	0.25	0.23	0.41	0.28	0.74	1.05	1.98	0.16	2.41	0.83	0.74	3.98	2.17	2.87	0.21	1.21	1.61	1.07	2.23	2.14	1.3	1.32	0.86	0.55	1.50835	0.000251783	0.00795451
GeneID:112532620	1222	45.48	144.54	27.46	29.19	87	71.24	29.86	16.4	34.39	48.8	48.53	41.91	47.72	34.1	25.57	55.62	143.55	98.51	66.42	210.23	194.17	78.34	147.25	181.03	165.91	40.52	203.61	220.37	88.15	109.77	155.3	294.53	122.73	308.64	31.96	1.48304	1.61549e-09	5.78185e-07
GeneID:107049357	4203	0	0	0.41	0	0.03	0	0	0	0	0	0.11	0	0	0.11	0.07	0	0.16	0.31	0.2	0.15	0.05	0	0.82	0.92	0.04	0.1	0.31	0.22	0.72	0.72	0	3.92	0.21	5.16	0.27	3.56339	0.000154676	0.00549778
novel.18933	818	0.39	1.73	0.08	0.33	0	1.88	0	0	0.37	1.25	1.97	0.93	3.56	0	0.57	1.03	2.92	0.69	0	0.56	0	0.22	0	0	0	0	0	0.8	0.15	0	0.02	0.6	0	0.3	0.08	-2.82539	0.000359799	0.0100491
GeneID:112529954	1309	428.87	88.36	376.38	210.81	300.23	112.95	219.97	138.75	169.23	318	153.12	355.69	368.3	396.64	187.93	664.18	90.47	202.87	6.87	34.81	8.48	10.11	17.17	11.64	17.72	35.24	14.92	114.64	47.04	84.46	73.95	232.49	10.63	9.49	124.42	-2.23749	6.64949e-13	8.76788e-10
GeneID:396206	2642	0.23	3.07	1.23	0.18	0.27	0.54	0.22	0	0.42	0.39	1.8	0.05	1.22	0.21	0.11	0.36	0.54	0.76	0.16	2.42	1	0.95	1.3	4.27	5.62	0.59	2.06	0.29	2.87	5.92	3.59	1.1	0.75	2.03	1.99	1.72173	8.52904e-05	0.00349341
novel.20948	4730	0.74	2.56	1.94	5.15	4.14	1.27	23.32	1.96	3.03	1.63	3.29	2.41	1.93	6.77	4.91	2.26	2.92	4.22	6.81	2.39	1.01	1.87	1.98	2.17	2.47	2.05	2.3	3.16	1.12	0.91	1.41	2.39	2.29	1.69	2.48	-1.05937	0.000914738	0.0193555
novel.10276	1615	1.45	0.67	0.95	1.99	5.35	3.53	2.55	1.93	0.37	1.63	2.13	2.04	1.55	0.75	0.84	1.29	3.02	1.56	7.26	1.39	5.12	1.11	0	10.98	0.68	10.14	13.05	1.39	0.74	9.83	3.06	10.84	8.25	12.4	8.51	1.60175	0.000124151	0.00465622
GeneID:112533351	5288	0.06	0.15	0.06	0.16	0.01	0	0.35	0.04	0.03	0.12	0.04	0	0.03	0.19	0.19	0.12	0.01	0.11	0.05	0	0.07	0	0.01	0.04	0.06	0.02	0.03	0.09	0.05	0.07	0	0.05	0.01	0.04	0.04	-1.47609	0.0034046	0.0475714
novel.22346	895	0.64	0.55	0.36	0.39	0.22	1.68	0.45	0.76	0.34	0.39	0.84	0.1	0.91	0.39	0.33	0.11	0.57	0.38	0.28	1.88	1.06	1.37	1.06	1.83	2.44	0.74	2.17	0.75	2.28	0	1.64	0.23	0.93	1.62	2	1.29651	0.000348767	0.00982863
GeneID:100859517	658	3.3	2.9	0.99	0.18	11.42	5.78	2.25	2.92	1.73	0.17	0	6.86	1.34	1.67	1.58	0.18	11.83	5.97	1.31	1.45	0.36	0	2.15	2.27	2.19	0.35	1.35	0.51	0.5	1.53	0	1.36	1.29	3.61	0.94	-1.63296	0.0013289	0.0250781
GeneID:396495	1181	8.01	14.06	17.09	103.75	10.67	18.83	51.35	15.33	21.72	12.42	12.4	9.64	19.46	18.07	95.05	6.02	19	80.83	219.28	15.6	9.82	30.21	18.43	15.49	18.96	157.24	19.43	8.38	16.67	18.28	16.72	6.08	6.27	12.22	8.52	-1.07943	0.000883828	0.0188892
GeneID:112530699	780	0	0	0	0	0	0	0	0	0	0	0	0	0	0.22	0	0	0	0	0.57	0.15	0.13	0.15	0.79	1.23	0.27	0.28	0.14	0.5	0.37	1.5	1.62	0.56	0.27	0	0.92	4.16688	9.77421e-09	2.44873e-06
GeneID:107049489	1002	0.27	0.18	0.49	0.16	0.7	0.3	2.21	1	0.16	0.36	0.05	0.2	0.17	0.17	0.18	1.81	0.32	0	3.45	0.1	6.91	0.62	1.15	0.23	0.65	0.12	0.19	0.37	2.45	0.76	0.99	0.18	0.81	10.45	4.25	1.65255	0.00159458	0.0282126
GeneID:429329	1146	0.08	1.91	0.07	0.19	1.53	0.06	0.08	0.24	0.34	0.2	0.77	0.28	0.7	0.08	0.06	0	0.91	0	0.16	1.12	0.34	0.41	0.73	0.41	3.41	1.85	2.39	3.02	0.66	0.74	1.32	3.57	1.97	3.09	2.32	1.94395	0.000267559	0.00823039
GeneID:428101	5988	5.01	5.38	1.74	0.36	3.35	6.11	0.82	0.86	1.53	4.14	3.87	1.15	3.99	4.31	0.65	4.08	8.02	4.13	0.49	14.62	10.35	2.68	4.11	12.69	6.13	0.21	8.21	19.61	6.97	6.5	7.68	14.31	9.55	13.38	4.41	1.267	0.000489849	0.0124338
GeneID:427378	887	0.22	0.66	0.68	1.59	0.55	1.03	1.21	1.63	4.13	1.94	0	0.85	0.56	1.32	0.48	0.33	0.45	0.33	3.84	1.88	4.69	3.09	2.42	3.28	0.67	5	4.11	5.83	4.6	1.79	3.73	4.49	2.04	2.61	5.19	1.66223	2.53823e-07	3.4142e-05
novel.16688	631	1.48	0.98	1.26	0	0.2	0.74	0.2	0	0.21	0	0.36	0	0.42	0.68	0.19	0	0.79	0.39	0	0	1.56	0.98	1.53	2.42	1.19	0.58	0.84	1.3	1.26	0.8	1.22	3.81	1.4	1.66	1.36	1.49896	0.000792261	0.0175806
GeneID:100858343	862	5.52	3.61	8.56	3.71	11.53	2.92	1.58	5.75	2.55	1.05	1.84	9.44	25.46	2.18	16.25	49.42	5.09	2.48	132.42	570.85	135.88	334.59	2.16	7.75	7.78	11.43	3.61	2.25	14.89	194.97	7.81	2.01	17.73	3.93	297.59	2.35037	2.717e-06	0.000250254
GeneID:101747901	1009	1.12	0.5	0.35	0	0.97	1.13	0	1.39	0.21	0.09	1.21	0.21	0.89	0	0.18	0.33	0.61	0	1.99	14.47	0.53	31.84	76.2	19.93	25.07	80.41	24.51	79.1	28.01	43.51	48.35	17.75	22.92	10.65	30.38	5.98536	2.35713e-35	5.90532e-31
GeneID:112531353	2454	0.1	0	0.13	0.08	0	0.22	0.06	0.09	0.21	0.13	0.08	0.06	0.09	0.07	0	0.13	0.12	0.04	0.15	0.11	0.23	0.2	0.24	0.88	0.08	0.02	0.12	0.09	0.1	0.25	0.1	0.35	0.07	0.58	0.72	1.45332	0.000395711	0.0107875
GeneID:107054453	4252	0.95	0.62	0.29	0.38	0.27	1.4	0.5	0.16	0.9	0.87	0.32	0.17	0.78	0.4	0.47	1.21	0.51	0.26	0.76	2.13	2.75	1.01	1.67	1.18	1.9	0.66	1.31	0.89	0.83	1.48	1.16	1.55	1.77	1.65	2.11	1.36747	1.58253e-07	2.26555e-05
novel.18664	987	0	0	0	0	0	0	0	0	0	0	0	0	0	0	0	0	0	0	0.75	0	1.07	0	0	0	2.22	1.06	1.24	1.53	1.1	2.4	1.47	0	0.09	1.03	1.5	5.63526	6.45855e-10	2.76501e-07
GeneID:408184	2026	5.67	8.06	10.86	29.28	2.04	4.85	32.47	2.86	20.34	7.73	4.24	0.81	8.17	18.43	40.09	8.24	6.56	4.87	9.87	4.08	4.09	7.19	3.42	4.19	4.31	7.2	4.58	8.73	3.71	4.8	4.63	12.14	8.86	5.74	8.57	-1.00764	0.00243318	0.0380915
GeneID:112532663	261	36.98	6.19	32.76	19.69	0	38.25	0	6.8	25.73	51.95	34.48	0	36.42	93.67	16.54	24.64	8.06	29.65	15.03	11.06	0	23.97	10.47	0	15.98	14.57	11.63	7.12	14.75	8.76	8.68	0	6.06	0	22.09	-1.48671	0.00351719	0.0486292
GeneID:395522	1455	0	0	0	0.32	0	0.15	0	0.05	0.11	0.15	0.24	0	0.11	0.13	0	0.05	0.23	0.16	0.16	0.24	0.21	0.24	0.64	0.38	0.6	0.1	0.44	0.3	0.45	0.4	0.27	0.17	0.05	0	0	1.46778	0.00285069	0.0423848
GeneID:101751992	1288	0.13	0.2	0.04	0.5	0	0.12	0	0	0	0	0	0	0.35	0	0.17	0.18	0.34	0.24	0.15	0.21	0.46	0.14	0.26	0.43	0.38	0.42	0.52	0.26	0.36	0.35	0.38	0.26	0.06	0.61	0.51	1.3615	0.00108318	0.0217747
GeneID:107057129	6545	0	0	0.01	0	0.03	0.02	0.02	0	0.01	0.01	0.01	0	0.01	0.01	0.01	0	0.01	0.02	0.07	0	0.01	0.04	0.02	0.04	0	0.05	0.02	0.02	0.05	0.03	0.04	0.05	0.02	0.01	0.02	1.55589	0.00255213	0.0392985
GeneID:427900	9069	0.01	0.01	0.01	0	0	0	0.01	0	0.01	0.01	0.02	0	0.01	0	0.03	0.01	0	0.01	0.03	0.01	0.01	0.02	0.06	0.04	0.08	0.04	0.02	0.03	0.01	0.01	0	0.05	0	0.01	0.07	1.84748	0.00108258	0.0217747
novel.15013	2395	0.31	0.06	0.49	0	0.28	0.2	0.18	0	0.33	0.11	0.16	0.09	0.06	0	0.03	0.09	0	0.06	0.33	0.13	0.29	0.33	0.31	0.53	0.36	0.28	0.36	0.27	0.25	0.08	0.15	0.39	0.46	0.35	0.36	1.08467	0.00343552	0.0478433
GeneID:101749839	6946	0	0.01	0	0.02	0	0	0.01	0.03	0	0.06	0.11	0	0.03	0	0.03	0.01	0.01	0	0.19	0.02	0.01	0.03	0.01	0.13	0.04	0.04	0.02	0	0.07	0.01	0.01	0.03	0.14	0.03	0.07	2.14442	0.000145026	0.00523475
novel.18120	905	0	0.11	0.57	0.21	0.21	1.02	0	0.11	0.55	0.18	0.47	0	4.25	0.79	0.78	0	0.78	1.16	0	0.28	0.42	0.11	0.14	0.11	0.2	0.25	0	0.1	0	0	0.21	0.13	0.16	0	0.35	-2.41892	0.000471286	0.0121598
GeneID:107052999	1806	0.39	0.69	0.19	0.61	0.38	0.08	0.75	0.21	0.42	0.11	0.32	0.48	0.21	0.43	0.55	0.41	0.18	0.04	0.17	0.42	0.16	0.09	0.24	0.25	0	0.16	0.08	0.08	0.15	0.15	0	0.04	0.16	0.45	0.29	-1.19544	0.00114533	0.0226651
GeneID:101751667	702	0	0	0	0	0.42	0.37	0	0	0	0	0	0	0	0	0	0	0	0	0	0	4.82	0	0.15	0	0.54	0	0.03	0.08	0	0.03	0	0.05	0	3.96	2.74	4.04567	0.000728644	0.0164309
GeneID:427816	1358	0.06	0.25	0	0	0.12	0.23	0.12	5.06	0.06	4.97	0	0.06	0.06	0.14	0.17	0	0	1.3	0.06	0	0.06	0	0.69	8.89	0.95	0	4.43	0.22	0.11	0	5.97	0.18	12.59	0	0	2.91552	0.000841289	0.0182483
GeneID:107049648	2095	0	0	0	0	0	0	0	0	0	0	0	0	0	0	0	0	0	0.14	0	0	0.2	0	0.05	0.04	0	0.36	0	0.25	0.08	0.01	0	0.35	0	1.25	0.16	3.73337	0.00330788	0.0465588
GeneID:396132	1378	3.84	3.61	4.07	2.77	4.36	2.8	3.82	6.67	1.93	2.51	6.13	9.83	3.01	3.99	0.74	3.57	2.04	5.57	1.62	1.32	2.4	1.9	4.48	1.16	2.97	2.26	1.81	1.76	2.6	0.54	2.57	2.28	1.67	2.13	1.86	-1.09631	1.99571e-05	0.00117921
GeneID:425214	771	5.03	18.95	28.51	9.79	1.45	10.86	15.53	1.93	11.35	16.76	6.19	1.26	19.96	15.07	3.32	9.43	8.29	7.7	8.18	15.24	18.66	49.57	35.94	39.15	7.24	38.62	25.05	23	19.61	11.74	57.65	26.63	9.52	17.86	93.75	1.3608	1.66695e-05	0.0010528
GeneID:418545	5035	0.2	0.17	0.21	0.49	0.2	0.12	0.33	0.24	0.4	0.39	0.12	0.13	1.01	0.13	0.2	0.39	0.26	0.29	2.24	0.91	2.43	0.72	0.85	0.74	0.42	0.99	0.57	0.78	1.4	0.66	0.33	0.6	0.44	0.78	1.67	1.61558	1.67006e-08	3.80333e-06
novel.19032	753	0	0	0.26	0.14	0	0	0.29	0.28	0	0	0.16	0	0.15	0.16	0	0	0	0	1.31	0	0	0	2.01	0.73	1.57	1.51	0.15	0	0.52	1.19	0.29	1.04	0	0	0.15	2.85399	0.000533112	0.0133029
GeneID:419216	2307	1.1	1.86	2.59	4.08	0.22	1.36	4.23	5.31	7.02	2.52	0.44	0.45	5.01	0.29	0.77	1.18	1.21	0.37	10.94	0.97	12.04	7.61	3.48	2.76	1.84	14.72	5.94	9.94	6.65	4.01	6.85	6.45	3.15	5.99	10.43	1.5194	7.78799e-05	0.00324646
GeneID:770610	7484	0.32	0.34	0.62	0.52	0.43	0.71	0.22	0.41	0.22	0.2	0.4	0.22	0.25	0.14	0.61	0.41	0.38	0.67	0.57	1.05	0.7	0.55	0.56	1.24	1.07	0.57	0.63	0.75	1.19	0.91	0.82	1.17	1.02	0.92	0.63	1.01003	1.54456e-08	3.55007e-06
GeneID:112531808	531	0.95	2.84	2.05	3.16	0	0.87	2.44	0.59	0.95	1.65	1.56	0.29	1.88	0.55	1.41	1.46	0.32	0	2.73	1.35	3.24	2.47	2.41	3.12	9.93	0.58	5.38	3.63	3.94	2.73	6.8	3.86	0.9	1.89	4.61	1.41551	6.04888e-05	0.00268217
novel.8673	3675	0.1	0.49	0.28	0.45	0.45	0.56	0.44	1.29	0.37	0.56	0.46	1.21	0.04	0.3	0.65	0.09	0.95	0.36	0.02	0.04	0.03	0.08	0.21	0.11	0.13	0	0.07	0.15	0	0.1	0.05	0.17	0.04	0.16	0.04	-2.78448	4.6184e-12	4.38543e-09
GeneID:107053357	795	0.55	0.6	0.12	0.89	0.23	0.63	0.87	0	0.54	0.92	0.76	0.22	0.37	0.45	1.38	0.52	0.68	1.4	0.07	0.18	0.46	0.43	0.84	0.4	0.41	0.39	0.66	0.44	0.14	0.18	0.19	0.36	0.48	0.07	0.4	-1.02158	0.00242259	0.0380045
GeneID:419812	1825	1.39	2.84	0.85	1.5	1.56	1.99	1.24	0.56	1.2	1.12	1.29	1.86	1.13	1.69	3.75	1.64	2.15	4.08	2.75	3.35	2.64	3.71	3.18	5.14	6.77	3.32	3.39	2.07	4.05	5.95	4.99	3.5	2	4.38	3.73	1.02505	2.79364e-07	3.64526e-05
GeneID:107056270	1177	4.03	4.09	2.21	1.89	5.04	2.65	1.17	8.77	1.93	0.53	0.51	2.15	2.29	2.82	1.73	3.64	2.66	3.23	1.5	1.21	0.12	0.27	2.5	4.39	3.04	1.76	1.53	1.21	0.86	1.5	1.76	2.79	2.82	1.66	0.44	-1.07943	0.00116684	0.022991
GeneID:421899	12746	0.02	0.69	0.06	0	0.02	0.01	0.15	0	0.04	0.03	1.18	0.84	0.73	0.02	0.09	0.01	1.11	0.02	0.12	0.06	0.05	0	0.01	0.01	0.01	0.03	0.22	0.05	0.03	0.07	0.01	0.08	0.01	0.01	0.01	-2.76358	9.23377e-06	0.00065907
GeneID:107055083	1006	0.28	0.66	0.33	0.7	0	0.59	0	0.98	0.74	0.41	1.09	0.88	1.02	0.21	0.77	0.72	0.1	0.18	0	0	0.26	0	0	0	0.09	0	0	0	0	0	0	0	0	0	0.09	-4.28061	1.46179e-10	8.51677e-08
GeneID:107056551	1084	8.89	60.22	26.95	16.9	30.4	84.38	19.08	5.51	22.13	39.43	36.42	15.85	16.34	34.73	31.57	30.63	122.39	67.11	43.3	72.34	66.66	64.74	81.47	237.52	256.57	13.76	262.73	59.9	96.11	48.42	61.65	54.31	88.45	62.31	27.61	1.37887	1.62931e-05	0.00103602
novel.9835	1387	0.06	0	0.05	0	0.24	0.05	0.12	0.11	0.18	0	0.19	0.06	0	0.07	0	0	0.18	0.06	0.06	0.39	0.06	0.25	0.27	0.29	0.23	0	0.18	0.11	0.27	0.11	0.4	1.77	0.57	0.29	0	1.89842	0.000848057	0.0183475
novel.24159	466	0	0	0	0	0	0	0.1	0.14	0	0.17	0	0	0	0	0	0.18	0.05	0.81	0.19	0.75	0.09	1.36	3.28	3.32	0.64	0.18	0	0.62	0.4	0.09	0.3	1.95	0	5.1	1.16	3.39586	2.68032e-05	0.00146937
GeneID:396498	1188	12.47	5.8	5.89	43.02	10.58	6.1	35.19	53.27	14.58	19.74	12.29	19.83	2.56	21.86	14.34	12.88	7.15	1.33	4.44	2.58	14.13	36.08	1.37	3.13	1.63	5.25	1.13	5.4	6.83	8.24	2.78	3.72	9.08	2.84	7.69	-1.14855	0.00180278	0.0307874
GeneID:428382	3597	1.6	3.13	6.32	2.45	4.59	1.72	6.05	3.44	6.74	4.46	2.9	3.95	5.25	6.74	3.82	2.37	2.73	3.43	1.57	1.49	1.34	1.11	0.79	2.22	2.04	1.23	2.49	1.18	1.79	1.68	1.56	1.31	1.19	1.52	0.98	-1.52077	2.79409e-16	5.83337e-13
novel.2104	584	0.52	0.64	2.3	0	2.39	2.16	0	1.64	0.54	0	0.01	0.23	1.85	0.42	0.28	0	1.52	1.31	0.3	0	0	0	0	0	0.2	0	0.26	0	0.22	0	0.88	0.64	0	0.49	0	-2.75141	0.000414734	0.0110771
novel.10303	805	0.78	2.45	5.58	1.64	0	3.64	1.36	2.16	1.27	0.74	1.24	1.12	2.51	1.49	1.23	2.64	0.29	1.75	1.21	0.76	0.39	0.36	0.65	1.08	0.64	0.39	0	0.19	0.3	0.58	0.89	0.13	0.39	0.19	0.18	-1.69286	1.42368e-05	0.00092403
novel.23753	1173	37.11	13.81	16.26	8.03	13.64	9.18	10.03	4.28	18.77	17.25	18.13	1.67	3.92	7.79	15.45	46.53	24.15	11.79	23.55	24.08	57.35	40.32	6.86	49.01	19.02	28.05	37.75	40.39	36.65	85.55	94.86	20.48	25.45	31.7	30.18	1.07666	7.11204e-07	8.24898e-05
novel.4570	475	0	0.77	0.35	0.78	0.41	0.89	0.83	0.4	1.55	0	0	0.59	0	0	0.5	0.47	2.41	1.54	1.25	4.33	1.65	0.82	2.54	4.94	8.4	2	3.93	0.51	2.16	0.73	0.39	3.65	1.09	3.26	0.42	2.16305	5.59937e-05	0.00255987
novel.13621	2362	0.72	0	1.8	0.25	0.34	1.77	0.95	1.78	0.93	0.67	11.98	0.13	0.2	0.04	0.26	0.06	1.18	4.24	0.33	0.43	0.2	7.32	7.92	32.83	0.63	0.26	8.47	1.49	3.89	0.46	12.15	15.97	0.1	9.7	3.72	2.04246	0.00259891	0.0397178
novel.20886	1930	0.32	0.51	0.03	0	0	0.69	0.15	0	0.08	0.11	0.04	0	0	0.18	0.15	0.08	0	0.65	0.73	0.26	0.07	0.46	1.03	1.14	0.54	0.04	1.09	0.38	0.5	0.32	0.56	0.58	0.45	0.57	0.35	1.64354	0.000874843	0.0187971
GeneID:107054678	3862	0.14	0.21	0.21	0	0.05	0.23	0.16	0.1	0.02	0.21	0.21	0.05	0.14	0.16	0.02	0	0.07	0.28	0.23	0.39	0.21	0.44	0.3	0.36	0.31	0.34	0.44	0.17	0.35	0.4	0.29	0.16	0.19	0.15	0.33	1.1889	3.77854e-05	0.00189707
GeneID:107049816	4614	0.16	0.02	0.18	0.12	0.39	0.12	0.07	0.06	0.14	0.1	2.19	0.03	0.11	0	0.21	0.11	0.11	0.59	0.09	0.08	0.04	1.24	0.64	2.95	0.07	0.02	0.65	0	1.16	0.29	0.36	5.22	0.07	3.76	0.51	2.94527	5.102e-06	0.000408372
GeneID:396532	3940	10.49	14.28	18.78	31.32	2.68	8.48	36.35	37.26	52.14	23.55	4.27	4.95	47.57	8.39	11.74	11.56	8.13	4.9	64.16	6.97	74.14	46.35	19.5	20.61	11.57	76.74	30.87	48.86	48.04	25.71	33.23	52.24	21.76	36.58	74.39	1.0977	0.00201228	0.0334529
GeneID:107050915	4304	0.87	1.48	0.56	0.99	1.22	0.63	1.95	0	0.27	0.51	1.81	0.31	0.53	0.94	1.06	0.8	0.37	1.54	0.28	0.28	0.3	0.18	0.3	0.38	0.37	0.23	1.07	0.46	0.33	0.29	0.66	0.67	0.29	0.45	0.19	-1.30452	2.52877e-05	0.00142188
GeneID:101750669	9919	0.01	0.05	0.01	0.02	0.02	0.04	0.03	0.03	0.06	0.03	0.01	0.01	0.05	0.03	0.05	0.1	0.03	0.02	0.07	0.06	0.09	0.09	0.11	0.09	0.12	0.05	0.08	0.07	0.01	0.07	0.06	0.06	0.09	0.04	0.1	1.15024	5.08835e-05	0.00236949
novel.2134	8148	0.05	0.16	0.02	0.03	0.23	0.23	0.35	0.14	0.08	0.09	0.13	0.3	0.47	0.13	0.11	0.07	0.21	0.3	0.38	0.41	0.32	0.32	1.4	0.26	0.3	0.22	0.27	1.32	0.2	0.21	0.08	1.1	0.12	1.09	0.46	1.4012	0.000130339	0.00485199
novel.13909	4939	0.69	0.31	1.73	1.05	1.47	1.13	1.27	1.72	2.56	1.01	0.79	0.75	0.44	1.74	2.21	1.19	1.34	6.09	0.23	0.14	0.42	0.52	0.51	1.44	0.84	0.07	0.4	0.15	1.15	0.27	0.83	0.14	1.05	2.24	0.6	-1.07416	0.00325723	0.0460613
novel.1788	1394	0.11	1.11	0.64	0.25	0.48	3.77	0.71	1.19	0.34	0.29	0.7	0.19	0.17	0.48	1.59	0.32	0.95	0.91	0.84	1.21	0.89	0.49	4.57	0.82	0.72	1.64	1.28	7.01	0.35	0.12	0.63	4.52	3.32	2.19	2.6	1.25008	0.00320887	0.0455994
GeneID:395671	10529	0.22	0.38	0.22	0.18	0.21	0.47	0.16	0.1	0.23	0.29	0.18	0.11	0.33	0.17	0.25	0.27	0.62	0.32	0.09	0.06	0.11	0.22	0.1	0.24	0.08	0.11	0.1	0.19	0.26	0.13	0.07	0.17	0.17	0.04	0.1	-1.13964	6.97076e-08	1.19615e-05
GeneID:100857860	1258	1.2	1.02	5.47	5.7	2.32	3.97	1.92	0.12	4.2	0.12	6.4	4.94	3.67	9.5	2.97	0	3.47	2.56	0.84	0.25	0.66	0.62	2	2.54	1.68	0.38	2.4	0.55	0.58	0.76	0.4	1.43	2.84	0.34	0.49	-1.8338	3.35158e-05	0.00174206
GeneID:428155	2277	0.3	0.07	0.08	0.53	0.33	0.18	0.49	0.32	0.43	0	0.49	0.33	0.2	0.07	0.28	0.13	0.31	0.21	0	0	0.2	0.07	0.17	0.06	0.06	0.36	0.07	0.11	0.06	0	0.06	0.06	0.06	0.02	0.06	-1.67365	0.000142061	0.00517304
GeneID:112531164	1861	2.54	1.35	1.65	2.04	1.66	4.08	1.48	0.59	2.07	1.42	2.28	0.98	1.86	2.56	2.02	3	3.77	4.84	0.92	6.38	3.65	5.21	3.21	9.67	5.6	2.79	4.84	3.84	3.87	10.34	15.97	2.9	4.23	4.07	2.63	1.00089	3.86651e-05	0.00192604
GeneID:396485	617	1510.16	2874.57	1150.15	3822.78	780.37	2080.21	5464.14	11464.8	6032.28	1813.71	631.68	1899.45	5563.3	740.93	879.81	1603.82	2130	667.25	14517.5	2432.49	16309.1	5870.51	7448.66	6386.1	2985.02	11254.5	9787.2	15673.3	7631.77	4265.24	7255.59	14728.5	7953.28	11980	12423.6	1.56486	3.19341e-06	0.000283704
novel.23005	226	304.86	8.56	32.98	1.9	1.85	17.34	39.66	1.63	8.35	8.02	142.27	87.57	0.49	74.46	0.49	9.8	0.68	1.54	41.11	0.16	98	2.67	0.26	0.22	0.33	0.58	39.18	3.82	0.75	26.07	0.4	5.43	4.91	445.7	74.81	-2.3895	3.73893e-08	7.55414e-06
GeneID:421735	2331	0.16	0.12	0	0	0.23	0.36	0	0.1	0.22	0.15	0.17	0.1	0.11	0	0.03	0.21	0.27	0.18	0.13	0.89	0.88	0	0.6	0.43	0.05	0.1	1.1	1.08	0.44	0.63	0.87	0.68	1.18	1.91	0.28	2.08662	2.29735e-06	0.000214759
GeneID:395337	5616	1.25	0.82	1.81	22.04	1.39	0.72	10.87	2.94	7.65	4.42	1.58	3.78	2.48	4.79	11.14	0.82	1.07	1.37	7.21	0.75	0.57	1.66	1.17	0.25	0.33	73.79	0.77	0.71	1.19	0.36	0.63	0.68	0.56	0.5	0.73	-1.24306	3.91693e-08	7.78816e-06
novel.22449	1450	0.65	1.18	0.11	0.11	0.92	1.51	0.43	0.87	0.77	0.31	1.12	2.11	0.65	0.34	0.94	0.25	0.86	0.92	0.4	0.91	3.86	0.24	0.16	2.54	4.9	2.27	6.18	1.54	1.2	4.02	4.34	0.28	1.16	0.98	0.91	1.31637	0.00146807	0.0268856
GeneID:107049264	3552	0.58	0.23	0.06	0.68	0.59	1.17	0.67	0.3	0.16	0.2	0.35	0.11	0	0.71	1.51	0.75	0.7	0.05	0.06	0.02	0.06	0.14	0.68	0.03	0	0.07	0	0.39	0	0.02	0.03	0.05	0	0.09	0.04	-2.4386	2.77824e-05	0.00150331
novel.24217	1490	0.28	1.36	0.31	0.11	0.14	1.14	0.28	0.2	0.39	0.15	0.2	0.24	0.98	1.12	0.48	0.25	0.72	0.47	0.25	0.93	1.22	0.62	2.32	0.17	0.94	1.34	0.24	2.55	0.9	0.48	0.45	1.64	0.82	3.46	2.01	1.27075	0.000799011	0.0176292
GeneID:395841	495	0	8.44	8.91	22.91	6.46	4.16	5.53	7.8	3.85	8.11	0.81	1.77	26.51	0.79	56.01	40.83	9.35	0	240.28	654.45	137.03	533.06	5.82	11.44	8.08	34.35	8.5	5.42	14.45	260.56	10.58	3.94	6.23	19.28	597.94	3.59964	4.41664e-07	5.36908e-05
novel.23999	1404	0	0.18	0.36	0	0.23	1.08	0.17	0.28	0.7	1.31	1.06	0	0	0.53	0.65	0.63	0.06	0.17	0.17	0.19	0.05	0.06	0	0.06	0.4	0.05	0.06	0	0	0.05	0.06	0	0.56	0	0	-2.09032	0.00124434	0.0239068
novel.8828	5566	0.27	0.65	0.14	0.3	2.39	0.81	0.63	0.49	0.49	0.26	0.26	0.8	0.2	0.77	0.3	0.22	0.56	0.75	1.11	0.33	0.16	0.27	0.3	0.73	0.12	0.06	0.04	0.11	0.28	0.13	0.27	0.33	0.3	0.13	0.13	-1.15703	0.00202412	0.0336053
novel.23685	1338	0.44	3.6	0.55	0.59	3.81	2.5	0.91	0.24	1.27	2.1	2.18	0.65	2.23	1.26	2.49	1.51	2.66	3.19	1.65	1.85	0.95	3.51	0.86	4.85	2.07	0.63	3.4	2.58	2.24	5.22	6.81	1.64	1.16	5.39	4.81	1.00003	0.00126998	0.0242537
GeneID:107053610	3426	1.57	5.08	0.96	2.91	1.4	0.38	5.23	0.02	0.44	1.08	2.02	0.17	0.64	1.71	2.16	0.94	0.26	4.48	0.86	0.35	0.35	0.21	0.23	0.55	1.03	0.31	1.87	0.51	0.08	0.18	0.35	0.46	0.27	0.33	0.28	-1.93504	4.06944e-06	0.000346774
GeneID:107049941	980	3.53	1.16	4.51	0.69	2.44	2.05	2.05	2.91	0.12	1.83	0.74	2.97	1.89	2.8	3.28	2.29	4.84	7	6.8	5.84	7.33	4.6	6.3	5.33	14.04	4.59	11.13	4.46	3.76	6.01	4.99	6.67	7.17	3.24	4.01	1.04615	7.66577e-06	0.000569883
GeneID:112530855	1638	4.12	3.91	4.05	0.37	1.68	2	1.44	2.18	1.06	1.4	1.95	3.2	2.89	4.08	2.29	0.4	2.02	0.56	1.98	5.31	6.96	2.06	3.84	8.07	5.61	4.17	10.54	5.17	3.07	3.94	5.64	0.4	5.62	5.8	4.06	1.03602	0.00253469	0.0391244
GeneID:395383	2230	0.23	1.2	1.7	2.45	0.17	0.34	0.39	0.32	1.68	0.92	0.35	0.06	3.07	0.49	2.28	0.81	1.67	0.45	3.58	1.84	3.87	3.26	0.57	2.53	3.46	2.68	0.75	0.73	2.3	2.32	2.46	0.65	1.26	2.08	3.71	1.07756	0.00253399	0.0391244
GeneID:374222	3536	2.31	7.79	1.43	0.57	7.09	8.45	2.47	1.34	6.47	4.59	6.92	3.46	3.55	3.78	3.28	4.65	5.02	13.61	6.22	11.47	7.4	4.97	14.89	23.04	20.87	0.53	20.77	8.47	9.14	7.74	11.14	12.59	13.22	11.04	3.92	1.11177	0.000300545	0.00897445
GeneID:395716	4435	0.75	1.62	1.06	0.36	0.45	1.92	0.64	0.22	0.65	1	0.97	0.29	0.99	1.65	0.4	0.58	1.72	2.57	0.25	1.69	1.66	0.21	1.09	1.93	1.75	1.07	0.97	5.55	1.09	1.87	2.78	6.13	3.78	4.49	3.38	1.13674	0.000384163	0.0105531
GeneID:107053853	11086	0.02	0.02	0.01	0.02	0.05	0.03	0.02	0.02	0.03	0.02	0.01	0.02	0.01	0.01	0.01	0.02	0.06	0.02	0.02	0.06	0.02	0.04	0.19	0.11	0.1	0.01	0.07	0.07	0.07	0.05	0.03	0.02	0.03	0.08	0.06	1.35834	7.68241e-05	0.00321315
GeneID:107052718	3796	10.1	758.49	526.93	71.8	39.6	524.49	722.71	56.15	29.22	1053.13	17.03	470.39	16.58	12.64	651.2	25.5	604.84	1570.1	10.42	7.97	11.37	13.5	3.8	4.93	7.32	49.54	8.52	0.53	11.57	276.97	6.92	16.93	20.27	1.61	35.67	-3.20976	4.61953e-07	5.56409e-05
GeneID:112530265	1135	0.76	0.87	0.74	1.22	0.78	3.6	0	0.29	1.6	0	2.51	1.43	1.02	1.14	2.16	0.74	0.85	0.37	7.09	0.71	0.95	0.08	0.59	0	25.78	1.54	10.11	6.77	1.43	0.44	1.77	3.59	0.47	13.59	7.91	2.12062	0.000275531	0.00841814
novel.19242	964	4.71	9.5	5.54	6.7	7.59	6.96	5.39	4.43	4.04	9.55	6.82	7.32	5.81	10.67	6.43	7.99	6.34	5.81	4.86	0.56	3.95	1.64	2.52	2.7	0.55	7.37	4.47	3.71	3.88	0.53	0.44	3.76	5.27	0.86	4.17	-1.29993	1.13175e-05	0.000770482
GeneID:418548	1436	2.14	2.13	1.84	4.24	1.12	2.23	2.99	2.76	3.17	2.19	2.71	1.48	2.2	2.58	1.95	1.97	1.73	2.2	7.33	5.62	5.19	2.48	3.98	4.91	3.56	7.76	6.69	7.44	4.22	3.69	3.95	5.67	3.09	8.96	4.27	1.1444	8.45564e-11	5.43177e-08
novel.11058	4016	0.39	0.68	0.63	1.15	0.23	0.77	0.27	0.3	0.9	0.41	0.63	0.29	0.61	0.51	0.45	0.45	0.38	0.82	0.49	1.04	1.55	0.75	5.2	1.66	1.44	0.38	1.35	1.36	1.27	0.16	1.85	0.36	0.81	0.81	0.79	1.12796	0.00010247	0.0040175
GeneID:107052157	5772	0.08	0.08	0.05	0.1	0.01	0.03	0.01	0	0.08	0.06	0.04	0.01	0.08	0.16	0.05	0.03	0.11	0.2	0.02	0.04	0.2	0.09	0.17	0.22	0.52	0.24	0.13	0.07	0.08	0.15	0.21	0.15	0.11	0.08	0.11	1.16784	0.00108219	0.0217747
novel.10569	2712	0.37	1.52	0.4	0.11	0.55	0.74	0.28	0.06	0.57	0.19	0.34	0.34	0.61	0.77	0.41	0.38	1.59	1.99	0.49	3.79	2.31	1.05	2.41	6.21	6.45	0.5	3.67	3.44	2.92	2.3	3.46	4.38	2.68	5.48	0.79	2.25805	3.96627e-11	2.74529e-08
novel.182	1964	0.12	0.35	0.54	1.21	0.35	0.14	0.42	0.15	0.11	0.07	0.29	0.18	0.38	0	0.14	0.08	0.36	0.59	0.34	0.17	0.04	0.21	0	0.07	0.08	0	0.08	0	0.24	0.07	0.26	0	0.15	0.04	0.04	-1.63212	0.000685567	0.0158609
GeneID:423072	4552	13.99	25.96	6.04	1.59	23.87	57.64	2.66	6.22	4.83	23.71	23.17	9.8	6.99	5.38	4.02	22.82	62.77	28.99	4.65	46.73	22.84	6.12	115.6	40.25	27.93	9.53	72.3	197.14	14.9	64.5	27.77	116.61	79.39	172.66	30.63	1.68633	0.000143308	0.00519981
GeneID:415791	1809	0.13	0.17	0.08	0	0.43	0.27	0.17	0	0.08	0.15	0.12	0.16	0.06	0.38	0.08	0.12	0.61	0.16	0.38	1.45	0.43	0.36	0.73	1.35	1.62	0.08	0.64	1.24	0.81	0.42	1.98	1.03	0.16	0.99	0.04	2.23401	6.2538e-08	1.10336e-05
GeneID:414891	9148	0.12	0.14	0.12	0.07	0.07	0.2	0.1	0.13	0.1	0.22	0.1	0.1	0.07	0.07	0.12	0.16	0.29	0.2	0.29	0.42	0.23	0.19	0.13	0.42	0.35	0.22	0.21	0.22	0.26	0.32	0.22	0.56	0.64	0.3	0.15	1.14726	4.47575e-08	8.55962e-06
GeneID:112531222	690	0	0	0.99	0	0.04	0.07	0.14	0	0	0.07	0	0	0	0	0.26	0.09	0.47	0	0.18	0.83	1.04	1.73	1.65	0.44	1.11	0.27	2.37	0	0.23	0.08	0.29	0.81	1.87	0	0.41	3.02512	0.000143824	0.00520698
GeneID:417787	9834	0.16	0.3	0.04	0.01	0.13	0.57	0.09	0.05	0.16	0.32	0.23	0.11	0.09	0.12	0.02	0.22	0.53	0.63	0.11	0.76	0.32	0.09	0.49	0.78	1	0.09	0.57	0.58	0.38	0.41	0.72	1.15	0.76	1.41	0.21	1.39227	0.000239435	0.00765122
GeneID:429272	5085	0.59	0.44	0.8	0.48	0.53	0.91	0.99	0.37	0.68	0.9	2.42	0.2	2.18	0.95	1.39	0.62	1.29	0.64	0.21	0.25	0.63	0.81	0.48	0.25	0.62	0.22	0.27	0.21	0.14	0.1	0.29	0.65	0.69	0.62	0.24	-1.26707	3.92079e-06	0.00033704
novel.23538	656	0	0	0	2.51	0.47	1.46	0	0	2.5	0	1.71	0.85	1.8	2.56	0	0	0	0.85	0	0	0	0	0	0	1.05	0	0	0	0	0	0	0	0	0	0	-3.71583	0.0024222	0.0380045
GeneID:415530	1752	7.58	13.34	8.24	3.86	34.52	14.41	8.3	18.43	10.74	5.37	7.85	7.53	19.19	15.68	10.95	6.25	12.74	6.46	0.99	8.97	4.61	2.65	5.21	8.43	6.97	0.44	9.2	10.8	5.3	3.03	5.06	9.12	10.25	6.95	7.42	-1.05802	0.00020598	0.00684405
GeneID:101750229	4230	0.62	0.21	0.01	0	0	0	0	0	0	0.01	0	0	0	0	0	0	0.02	0	0	0.12	0.03	0.02	0.39	0.03	0.02	0.01	0.08	0.51	0	0	0.05	0.06	0	0.03	0.74	3.0896	0.00170238	0.0295485
novel.5463	2255	1.52	1.01	1.11	0.6	0.91	1.58	2.36	1.33	2.29	1.24	1.24	0.67	1.75	0.51	0.62	1.07	1.63	0.39	0.32	0.38	1.07	0.3	0.49	0.97	0.28	0.44	0.49	1.16	0.18	0.43	0.34	1.14	0.95	0.39	0.64	-1.07999	1.97999e-05	0.00117921
GeneID:395805	2165	0.29	0.5	0.41	0.67	0.61	0.7	0.3	0.2	0.18	0.61	0.95	0.7	0.21	0.28	0.24	0.69	0.58	0.81	1.39	1.47	0.98	1.65	0.89	0.69	0.83	0.95	0.84	0.88	1.1	1.05	0.54	1.65	1.22	0.8	1.07	1.06128	9.11031e-08	1.43269e-05
GeneID:107049724	5753	0	0	0.02	0	0.02	0.04	0.05	0	0.02	0	0	0	0.02	0.01	0	0.01	0.06	0.01	0.14	0.04	0.05	0.03	0.12	0	0.05	0.01	0.03	0.03	0	0.05	0.08	0	0.04	0.06	0.17	1.87227	0.00250936	0.0388547
GeneID:112531392	2581	0	0.03	0	0	0.06	0.08	0	0	0.03	0	0.04	0	0	0.22	0.03	0	0.03	0.15	0.21	0.55	0.03	0.03	0.1	1.57	0.03	0.03	0.14	0.06	0.46	0.75	0.08	0.82	0.11	0.64	0.06	3.14994	2.84711e-06	0.000261277
GeneID:107049189	1227	0	0	0.03	0	0	0	0	0	0	0	0.34	0	0	0	0	0	0	0.03	0.09	0.5	1.28	0.08	0.75	1.39	0	0.75	0.08	0.2	1.16	0.31	0	3.88	0	2.02	0.4	4.48761	3.04809e-06	0.00027449
GeneID:107051747	963	0.2	0.17	0.22	0.3	0.15	0.21	1.48	0.14	0.37	0.09	0.29	0.05	0.32	1.81	0.72	0.05	0	0	0.14	0.11	0.02	0.18	0.03	0.14	0.12	0.05	0.07	0.09	0.11	0	0.02	0.29	0.19	0.17	0.19	-1.87507	0.000323759	0.00939402
novel.16637	238	0	69.64	0	224.62	70.7	0	313.15	89.91	88.19	142.35	121.29	116.73	0	46.7	127.48	19.58	39.05	74.3	0	0	0	0	0	0	34.63	0	0	6.82	0	43.39	30.56	63.56	0	0	0	-3.47499	1.01225e-05	0.00070444
GeneID:768614	1391	1.02	0.6	0.1	0.57	0.3	0.22	0.29	0.35	0.3	0.27	0.19	0.23	0.59	0	0.28	0.41	0.18	0.06	0.12	0	0.06	0.57	0	0.12	0.12	0	0.06	0	0	0	0.23	0.06	0	0	0.23	-1.95104	0.000226889	0.00737243
GeneID:424799	5831	0.15	0.37	0.22	0.02	0.08	0.2	0.01	0.11	0.14	0.18	0.02	0	0.17	0	0	0.08	0.41	0.17	0.06	0.39	0.38	0.02	0.18	0.88	0.25	0.02	0.18	1.06	0.18	0.29	0.24	0.8	0.65	0.69	0.16	1.48106	0.00191297	0.0322949
novel.10278	548	2.04	9.61	19.75	8.62	0	8.7	6.75	7.33	4.79	6.3	4.02	0.81	6.62	5.83	2.08	6.33	3.55	6.43	4.84	0.31	4.33	3.73	0.96	2.3	2.43	1.86	1.46	2.31	2.19	1.82	1.99	2.37	2.5	2.67	4.25	-1.37954	2.4823e-05	0.00140382
GeneID:769222	4861	5.53	10.16	3.53	3.4	13.97	6.11	32.67	17.93	8.74	10.78	8.93	5.71	3.42	17.8	8.77	8.1	12.76	9.91	1.83	6.42	4.63	2.8	4.07	8.26	5.89	0.8	4.75	15.12	3.77	3.11	5.45	4.26	4.61	5.19	4.55	-1.125	2.88449e-05	0.00154744
GeneID:100859032	4937	0.21	0.28	0.04	0.34	0.29	0.18	0.3	0.11	0.33	0.18	0.04	0.15	0.18	0.36	0.29	0.44	0.26	0.09	0.35	0.31	0.19	1.03	0.47	1.18	0.39	0.1	0.6	0.47	1.3	1.67	0.89	0.41	0.14	0.16	0.33	1.32196	7.60885e-05	0.0031984
GeneID:420597	2074	0.31	0.44	0.22	0.4	0.4	1.3	0.62	0.11	0.22	0.28	0.56	0.03	0.54	0.69	0.58	0.46	1.26	0.31	0.51	1.15	2.63	0.65	0.95	0.84	0.71	0.2	0.61	1.02	1.38	0.65	1.43	0.93	1.96	1.32	0.74	1.06644	0.000133612	0.00492261
GeneID:107050233	2135	0	0	0	0	0	0	0	0	0	0	0	0	0	0.53	0	0	0.04	0.19	1.35	1.3	0	0	0	4.27	0	0.25	0.21	0.5	0.18	0.19	0	2.01	0	2.99	0.16	4.67634	2.09874e-05	0.00121962
novel.8653	2876	0.38	0.2	0.28	0.16	0.25	0.09	0.12	0.05	0.2	0.31	0.29	0.05	0.47	0.5	0.12	0.12	0.51	0.24	0.34	1.37	0.73	0.27	0.76	0.64	0.39	0.27	0.49	0.83	1.12	0.51	0.78	0.73	1.03	0.86	0.51	1.44589	8.04822e-09	2.13678e-06
novel.97	1093	0.68	0.99	1.4	1.02	1.61	0.85	1.18	1.35	2.56	1.05	0.8	1.03	0.77	1.01	1.86	0.22	0.69	0.96	0	0	0.36	0.19	0.18	0	0	0	0	0	0	0.15	0.08	0.64	0	0	0.71	-3.3782	1.28738e-12	1.53584e-09
GeneID:112531693	2695	16.66	2.23	16.43	2.24	0	0.42	0	1.87	9.22	0.85	3.04	0.65	2.29	1.25	6.32	2.84	0	0.42	11.2	4.44	16.81	4.47	19.94	12.84	16.18	24.8	27.56	20.21	19.34	21.09	18.89	16.59	12.59	3.16	29.38	2.43717	3.84721e-05	0.00192604
novel.23443	754	1.12	5.56	1.13	0.5	1.37	0.73	1.72	2.06	0	1.75	1.03	3.65	3.12	2.62	2.83	0	1.54	0.8	1.49	0	2.1	13.6	2.88	10.17	21.13	4.79	9.6	10.84	0.89	2.2	22.39	8.37	0	11.48	2.35	1.94629	0.000173734	0.00596995
GeneID:427644	3345	0.02	0	0.02	0.05	0.02	0.09	0.09	0.11	0	0.03	0.08	0	0.09	0	0.11	0.02	0.02	0.02	0.11	0.06	0.14	0.1	0.06	0.2	0.21	0.02	0.13	0.06	0.1	0.14	0.12	0	0.18	0.11	0.16	1.25916	0.00204731	0.0339227
novel.2659	4269	0.6	0	0	0	0.03	1.65	0	1.85	0.02	0.26	0	3.12	0.3	0.65	0	0.37	2.27	0.03	0	0	0	0	0.04	0.03	0	0.03	0	0.03	0	0	0.02	0	0	0.02	0	-6.29942	1.04717e-08	2.5975e-06
novel.324	514	13.26	29.67	4.12	7.34	74.83	15.45	6.38	14.61	1.89	1.56	2.84	49.7	6.74	1.17	2.58	2.62	13.52	6.98	3.21	7.95	7.68	2.97	12.46	7.87	4.67	5.07	5.57	3.53	3.04	2.58	4.76	11.43	8.88	12.13	7.61	-1.43233	0.00140743	0.0261188
GeneID:429054	2973	1.11	0.77	1.21	0.62	2.96	1.72	1.76	2.03	1.25	0.41	1.29	0.1	1.01	1.49	0.99	2.37	1.4	10.23	4.54	5.04	2	2.97	5.05	6.89	5.88	1.49	5.86	3.21	6.32	5.3	4.28	3.56	3.79	3.56	3.66	1.19572	0.000114542	0.00437443
GeneID:107052242	17564	0.01	0.02	0.02	0.01	0.01	0.01	0	0	0	0.03	0	0.02	0	0	0.01	0.02	0.02	0.04	0.01	0.02	0.04	0.01	0.03	0.12	0.08	0.02	0.05	0.05	0.06	0.01	0.09	0.03	0.05	0.04	0.04	1.70323	8.96557e-06	0.000647304
GeneID:100858999	2289	8.82	2.59	22.28	122.79	6.58	4.14	81.76	30.04	25.88	10.58	5.26	15.57	9.93	12.61	117.67	3.47	5.43	5.54	60.5	2.56	3.98	19.18	5.72	3.87	6.08	160.27	5.68	3.25	4.32	3.79	4.97	5.3	2.42	4.22	10.75	-1.66876	0.00120146	0.0234243
GeneID:112531109	3192	2.9	0.98	0.19	0.24	0.93	2.47	2.27	0.18	0.97	0.63	1.73	0.12	0.51	0.95	2.98	0.67	0.78	1.6	0.47	1.91	5.4	4.81	0.17	6.97	1.08	1.46	4.06	1.56	0.6	2.57	6.54	1.34	3.23	4.16	3.71	1.62268	1.75535e-06	0.000176123
GeneID:418041	3847	0.37	0.63	0.3	0.39	0.49	0.63	0.43	0.51	0.53	0.71	0.37	0.33	0.48	0.47	0.24	0.71	0.83	0.4	0.68	1.08	1.23	0.54	0.5	1.48	0.96	0.5	1.18	1.23	0.86	1.19	1.14	0.93	1.69	1.21	0.84	1.03186	3.75946e-12	3.9244e-09
GeneID:396291	2829	0.21	0.5	0.41	0.34	0.1	0.05	0.17	0	0.18	0.11	0.33	0.05	2	0.24	0.17	0.43	0.69	0.15	4.54	0.25	3.54	1.38	0.53	0.7	0.2	0.66	0.49	0.5	0.59	0.26	0.32	0.7	0.24	0.43	1.96	1.57577	0.000690899	0.0159091
GeneID:417849	2171	0.27	0.34	0.13	0	0	0.38	0.15	0.07	0	0.17	0.32	0	0.19	0.04	0.03	0.18	0.39	0.22	0.04	0	0	0	0	0.04	0.11	0	0	0	0	0	0	0	0.04	0	0	-3.70341	4.97483e-07	5.93497e-05
novel.19813	3218	0	0	0	13.12	1.66	0	4.12	0	0	0	0	0	0	7.5	13.75	0	0	0	0	0	0	0	0	0	0	0	0	0	0	0	0	0	0	0.04	0	-9.96117	0.000209706	0.00694944
GeneID:430071	2385	0.08	0.28	0.22	0.21	0.17	0.21	0.23	0	0.08	0.11	0.07	0	0.19	0.34	0.58	0.35	0.26	0.23	0.59	0.43	1.16	0.61	0.42	0.56	0.6	0.34	0.93	1.07	0.3	1.23	1.48	1.63	0.24	1.78	1.04	2.07147	2.12965e-10	1.15041e-07
GeneID:418130	3739	0.22	0.11	0.07	0.07	0.15	0.26	0.07	0.16	0.2	0.2	0.04	0.05	0.07	0.15	0.12	0.09	0	0.29	0.11	0.08	0.27	0.18	0.61	0.39	0.16	0.1	0.56	0.42	0.1	0.03	0.25	0.45	0.58	1.57	0.38	1.40833	0.00019348	0.0065064
GeneID:771008	2208	0.62	0.2	0.54	0	0	0.29	0.08	0.68	0	0.15	0.17	0.51	0.13	0.09	0.25	0.15	0.4	0.13	0.23	0.15	0.43	0.25	2.12	0.45	0.33	0.36	0.23	0.77	0.98	0.84	0.15	0.49	0	1.68	0.88	1.43361	0.003127	0.0449704
GeneID:112531470	2757	0.52	0	1.06	0.78	3.34	0.87	1.19	1.38	0.36	1.11	8.34	0.14	0.04	0.09	1.14	0.59	0.12	6.83	0.64	1.28	0.03	9.62	7.25	33.31	0.39	0.44	7.66	0.37	5.13	0.47	11.78	14.14	0.18	30.47	2.94	2.44773	0.000304823	0.00903754
GeneID:430700	1178	0	0.3	0	0	0.3	0	0	3.21	0.15	3.56	0.16	0.07	0	0.25	0.21	0	0.08	0.5	0.07	0.16	0.28	0.16	0.42	4.97	0.22	0.34	3.39	0.46	0.07	0	2.84	0.07	5.73	0	0	2.53356	0.000648356	0.0152806
GeneID:396307	2889	0	0	2.09	0	0	2.96	0.44	0	0.09	0	0	0	0.11	0	7.11	2.27	0.35	11.47	0	0	0	0	0	0.03	0	0	0.75	0.06	0.08	0.56	0.07	8	0.05	0.13	0	-3.89602	0.0022246	0.0358411
novel.18219	1470	6.29	6.31	6.28	12.75	2.18	14.15	6.83	2.26	9.1	6.23	11.42	2.49	10.2	13.38	8.42	7.7	9.58	8.76	5.41	0	3.71	3.13	0	3.92	0.74	0	0.22	0.12	1.03	2.43	0	0	2.04	4.22	2.91	-2.24684	5.90996e-05	0.0026487
novel.23252	2804	0.6	1.74	0.46	1.1	0.34	0.63	1.23	0.2	0.61	0.72	1.22	0.28	1.11	1.24	0.9	0.3	1.11	1.24	1.7	1.42	3.55	3.49	0.89	6.41	3.09	2.4	1.57	3.56	1.6	3.33	4.38	0.09	2.4	4.57	3.88	1.72082	5.89803e-09	1.71818e-06
GeneID:107057280	1169	0.53	0	1.36	0.26	0.57	0.38	0.55	2.37	0.44	1.28	4.37	0	0.16	0	0.11	0.15	0	4.2	0.84	0.49	0.1	5.34	3.38	19.1	0.11	0.05	5.47	1.21	3.77	0.13	6.66	8.52	0.1	8.58	3.18	2.27981	0.000767259	0.0171473
GeneID:112531351	2396	0.98	0.38	1.21	0.07	0	2.09	1.37	1.5	0	0.25	0	1.33	0	0	0	0	0.78	0	0	0.13	0	0.06	0	0	0	0.07	0	0	0	0.17	0	0.09	0	0.42	0.09	-3.33286	0.000635793	0.0150411
GeneID:107054017	1851	0	0.06	0	0	0	0	0	0	0	0	0	0	0.13	0	0	0	0	0	0.06	0.21	0.07	0	0.07	0.24	0.12	0	0.13	0.19	0.22	0.07	0.16	0.28	0.07	0.12	0.28	3.53245	6.76682e-08	1.17797e-05
GeneID:426412	2531	0.65	1.43	0.24	0.35	0.28	1.73	0.31	0.61	0.12	0.32	0.88	0.38	0.35	0.44	0.05	0.31	0.67	0.57	0.42	1.54	0.87	0.26	1.75	2.39	1.2	0.29	1.33	1.87	0.53	1.84	0.65	1.52	1.6	1.7	0.89	1.22624	5.82226e-05	0.00263233
novel.2669	3352	0	0.11	0.17	0.07	0.06	0	0	0.12	0.25	0.15	0.08	0	0.04	0	0	0.03	0.23	0.06	0.83	0.55	0.32	0.08	0.12	0.62	0.34	0.21	0.31	0.09	0.09	0.29	0.51	0.53	0.44	0.35	0	2.13968	1.37028e-05	0.000891678
GeneID:420873	1232	5.84	6.95	1.17	5.88	2.28	7.88	12.71	1.76	8.89	6.71	8.27	2.17	2.34	2.98	9.09	1.03	7.1	4.93	7.3	18.39	26.91	3.54	40.99	17.97	6.31	6.85	26	22.16	17.6	12.45	16.36	23.87	81.25	17.95	9.12	1.84538	7.56517e-09	2.08275e-06
GeneID:112532618	2253	4.83	13.26	4.66	2.03	3.4	14.11	3.04	0.46	4.02	1.92	3.52	1.65	4.88	6.09	1.01	4.7	11.9	15	8.91	35.75	18.83	10.26	20.75	34.82	33.25	2.83	29.1	35.97	20.99	16.91	21.21	27.98	25.6	46.95	5.31	2.05865	2.79933e-10	1.40263e-07
GeneID:101747873	5050	0.06	0.04	0.05	0.07	0.54	0.04	0.12	0.27	0.08	0.06	0.05	0.54	0.13	0.09	0.02	0.06	0.04	0.13	0.04	0.12	0.03	0.04	0.12	0.02	0.08	0.06	0.04	0.05	0.07	0.07	0.04	0	0.02	0.08	0	-1.70649	0.000479591	0.0122736
GeneID:107057021	3236	0.41	0.28	1.15	1.05	0.69	2.09	0.4	0.76	0.13	0.37	0.34	0.81	0.38	0.29	0.44	0.31	0.48	0.43	1.05	1.3	0.55	1.54	3.86	1.1	1.02	0.94	1.27	0.51	2.39	1.33	0.8	3.96	0.81	1.95	2.78	1.28169	2.57778e-05	0.00143514
GeneID:769634	5466	0.06	0	0.02	0	0.03	0.1	0.01	0.61	0.33	0.26	0.16	0	0.03	0	0.34	0.11	0.05	0.07	0.02	0.06	0.06	0.07	0.83	4.86	0.88	0.05	0.75	0.02	0	0.03	0.08	0.1	0.83	0.07	0.05	2.15608	0.00269442	0.0407875
GeneID:428571	5734	0	0.02	0.02	0	0.01	0.01	0	0.02	0	0	0	0	0.02	0	0.02	0	0.02	0.01	0.02	0	0.03	0.03	0.01	0.03	0.11	0.02	0.01	0.06	0.02	0.01	0.02	0.05	0.04	0.02	0.03	1.65464	0.00223539	0.0359226
GeneID:107057578	2092	2.61	0.66	0.67	0.49	0.47	6.33	0.41	0.1	1.18	0.67	0.3	0.73	0.48	1.27	0.14	0.64	4.59	0.36	0.62	2.1	0.31	0.14	1.02	0.05	0.29	0.12	1.82	0.19	0.49	0.59	0.17	0.3	0.43	0.1	0.73	-1.27133	0.000886152	0.0189104
novel.11752	1685	9.19	13.48	2.6	6.75	9.2	15	10.27	4.92	5.72	7.98	6.9	9.78	7.91	14.34	11.26	6.56	11.57	12.12	15.75	4	67.12	17.27	13.03	38.75	28.25	16.25	26.65	28.24	7.15	33.46	38.67	6.49	12.34	65.36	47.31	1.29215	2.0321e-06	0.000196564
GeneID:107050658	1857	0.54	0.13	0.21	0.18	0.08	0.49	0.16	0	0	0	0.12	0	0	0.11	0.18	0.24	0.18	0	1.28	0.11	2.04	0	0	0.3	0.81	0.35	0.95	0.91	0.5	0.66	0.12	0.33	0.73	1.36	1.58	2.36254	1.93008e-05	0.00116236
novel.22566	694	1.4	0.87	3.14	2.6	1.02	2	0.68	0.16	0.35	3.59	0.56	2.11	2.41	4.16	1.42	1.65	2.31	1.14	0.84	0.37	0.81	1.24	0.97	2.89	0.99	0.64	1.04	0.46	1.2	0.15	0.5	0.17	0.66	0.68	0.34	-1.20048	0.000574218	0.0140624
GeneID:424061	6919	0.01	0.03	0.05	0.06	0.01	0.05	0.02	0.01	0	0.02	0.14	0	0.05	0.05	0.06	0.03	0.1	0.04	0.18	0.09	0.08	0.02	0.11	0.25	0.07	0.17	0.06	0.17	0.1	0.09	0.1	0.06	0.15	0.13	0.05	1.39418	5.64377e-05	0.00257079
GeneID:112530127	5362	0.01	0.1	0.06	0.04	0.03	0.09	0.06	0.05	0.11	0.02	0.07	0.06	0.09	0.08	0.08	0.05	0.05	0.1	0.21	0	0.1	0.14	0.12	0.16	0.24	0.45	0.23	0.04	0.17	0.03	0.13	0	0.03	0.29	0.19	1.18293	0.00282291	0.0421192
novel.6667	3462	1.85	1.97	1.06	1.41	1.23	1.25	1.28	0.96	2.45	2	1.88	0.2	1.7	1.38	0.94	1.72	1.89	1.43	0.14	0.12	1.27	0.09	0.17	0.82	0.14	0.04	0.09	0.13	1.27	0.15	0.89	0.25	2.06	0.25	0.33	-1.65244	6.80945e-06	0.000520114
GeneID:101752332	8925	0.15	0.07	0.09	0.05	0	0.06	0.12	0.05	0.01	0.07	0.09	0.02	0.08	0	0.1	0.04	0.06	0.03	0.01	0.02	0.03	0.06	0.07	0.02	0.02	0.01	0.02	0.02	0.03	0.01	0.01	0.01	0.01	0.11	0	-1.24151	0.00288026	0.0426977
GeneID:422782	3218	0.05	0.05	0.04	0.08	0.06	0.04	0.07	0	0.16	0.09	0	0.05	0.02	0.05	0.06	0.02	0.05	0.09	0.09	0.08	0.09	0	0.11	1.57	0.38	0.02	0.34	0.1	0	0.02	0.17	0.07	0.35	0.02	0.07	1.92847	0.000675273	0.0157373
GeneID:107050833	1758	132.99	31.05	105.9	46.87	61.05	20.37	49.4	40.86	34.74	46.99	32.45	80.33	136.48	84.48	46.77	136.69	26.34	42.08	5.89	12.26	4.48	6.98	16.95	9.49	11.46	12.9	13.38	39.85	29.5	24.61	21.07	32.32	6.02	3.23	9.58	-1.79018	1.15949e-10	7.08504e-08
novel.7726	2141	0.07	0.14	0.03	0.03	0.03	0.26	0.14	0.03	0.17	0.03	0	0	0	0.04	0.03	0	0	0.13	0	0	0	0	0	0	0	0	0	0	0	0	0	0	0	0	0	-3.41637	0.000125137	0.00468619
GeneID:428697	1842	0	0.29	0.04	0.36	0.29	0.12	0.16	0.4	0.58	0	0.22	0.28	0.29	0.28	0.19	0.08	0.34	0.28	0	0.05	0.08	0.04	0.09	0.12	0.28	0.08	0.21	0.22	0	0	0.04	0	0.12	0.08	0.08	-1.52992	0.000793598	0.0175896
GeneID:107049939	1601	0.19	0	0.09	0.06	1.65	0.38	0.03	0.1	0.07	0.08	0.74	0.02	0.03	0	0.18	0.06	0.47	0.99	1.62	0.98	0	2.13	3.66	8.73	1.24	0.06	1.04	0.62	1.94	0.07	2.06	8.99	0.02	7.37	3.18	2.94755	1.00727e-05	0.000702929
GeneID:100858066	1378	50.05	25.1	47.3	38.44	91.92	19.7	41.47	44.81	19.91	41.07	35.14	95.24	43.74	23.32	34.47	58.48	19.55	12.71	29.13	15.38	20.98	29.1	16.08	5.85	12.3	18.53	11.13	6.39	17.28	17.58	18.13	14.24	11.44	5.03	27.7	-1.51877	1.2135e-08	2.90583e-06
GeneID:107052553	2207	1.78	0.7	1.5	7.81	0.51	0.85	4.41	0.61	2.56	2.35	0.62	0.86	0.98	1.61	3.96	0.39	0.38	1.19	1.52	0.51	0.26	0.73	0.48	0.3	0.63	18.67	0.32	0.09	0.59	0.63	0.2	0	0.07	0.59	0.23	-2.18127	7.91204e-08	1.30155e-05
GeneID:772096	2029	0.23	0.06	0.37	0.84	0.44	0.2	0.74	0.42	0.74	0.15	0	0.03	0.22	0.62	0.96	0.05	0.03	0.39	0.15	0.67	0	6.67	3.63	0	0.16	2.63	0	0.03	3.17	4.15	4.29	0.03	0.6	0.09	3.29	2.1838	0.00123812	0.0238604
GeneID:107057093	1442	0.06	0.11	0	0.26	0.06	0.1	0.1	0.42	0.06	0.25	0.07	0.05	0.11	0.06	0	0.06	0.06	0.06	0.22	0.24	0.11	0.72	0.88	0.35	0.42	0.67	0.54	0.61	0.37	0.7	0.56	0.11	0.28	0.17	0.35	1.96042	6.22266e-07	7.28487e-05
GeneID:430443	3176	0	0	0	0	0.02	0.02	0.04	0.02	0.02	0	0.02	0	0.05	0	0.02	0.02	0.07	0.02	3.26	0	0	0.02	0	1.36	0	0	0	1.25	0.02	0.74	0	0	1.15	0	0.02	4.70243	4.07818e-05	0.00201123
GeneID:107049014	2664	5.62	0.25	1.47	0.59	1.54	0.59	1.1	1.2	0.51	0.91	1.3	0.89	1.02	2.05	1.75	2.56	0.5	2.18	1.6	2.14	8.7	1.81	2.61	3.72	0.77	1.03	0.84	0.81	1.13	4.67	6.61	1.97	2.02	1.35	1.47	1.10804	0.000457035	0.01189
GeneID:395551	385	44.62	6.71	31.04	250.72	16.05	6.59	296.99	36.95	107.38	55.56	24.52	29.92	44.29	29.38	179.15	29.97	9.73	9.14	164.73	10.09	14.63	41.99	15.06	8.85	5.03	498	9.89	7.7	21.13	7.87	19.41	5.24	13.02	11.12	18.74	-1.60208	0.00114354	0.0226475
GeneID:112531958	1857	0	0.29	0.11	0.23	0.33	0.53	0.16	0.08	0.16	0.07	0.18	0.08	0.25	0.23	0.23	0.4	0.04	0.12	0.2	0	0	0	0	0.04	0	0	0	0	0	0.04	0	0.04	0	0.04	0.04	-3.12081	2.71032e-07	3.58196e-05
GeneID:425137	1561	2.55	2.28	7.45	1.43	5.65	2.46	2.12	5.62	2.88	1.96	3.6	3.9	3.14	2.18	1.67	1.98	3.97	2.61	7.71	12.75	13.65	2.36	3.09	13.43	7.31	9.15	7.56	8.2	9.51	12.06	20.97	4.85	19.86	8.42	8.51	1.52738	1.99258e-10	1.12013e-07
novel.15556	779	4.23	2.97	0	4.02	0.95	2.58	0.92	3.74	2.59	2.33	5.23	9.67	3.62	3.14	1.84	2.36	2.16	3.2	0.52	0.19	0	0	0	0	0.66	0.27	0.39	0	0	0	0	0	0.01	0.46	0	-5.23234	5.14448e-21	4.29616e-17
GeneID:107055074	2790	0.4	0.54	0.35	0.27	0.65	0.63	0.33	0.46	0.42	0.23	0.73	0.7	0.54	0.67	0.4	0.41	0.61	0.77	0.58	0.43	0.52	0.97	1.74	1.04	0.79	0.55	0.73	1.1	0.92	1.48	0.69	2.04	2.24	0.77	1.52	1.00215	5.84073e-07	6.86985e-05
GeneID:395912	674	1276.97	2416.92	7517.87	18225.6	13641.5	2826.07	40489.2	10883.4	8577.89	2262.45	3081.18	4719.39	8896.95	20826.7	16613.2	3192.5	2654.34	2531.43	12086.3	3700.89	1475.22	8481.59	1345.88	1776.09	2450.09	5047.04	2384.82	1593.23	2189.27	966.89	2187.44	1462.26	2695.87	1286.57	2663.67	-1.67344	2.59182e-05	0.00143975
GeneID:100859369	1204	0	0	0	0.69	0	0	0	0	0.27	0	0.16	0.54	0.52	0.31	0	0	0.45	0.82	0.48	2.11	1.23	1.34	0	0.25	0.28	0.24	0	1.46	0.63	0.07	2.18	2.69	1.55	4.44	2.79	2.52297	0.000356065	0.00998936
GeneID:112533563	2656	3.57	7.59	2.12	5.11	6.25	3.43	5.31	11.52	5.19	3.51	4.25	12.73	3.32	5.05	8.16	6.34	7.4	5.38	3.44	3.99	2.73	3.83	2.33	4.92	2.99	2.44	6.56	1.73	1.67	4.45	2.94	5.75	1.74	1.66	2.64	-1.00494	2.89909e-05	0.00154962
GeneID:107049972	1194	0.15	0	0.15	0	0.15	0	1.83	0.07	0.07	0.6	0.38	0	0	0.16	0.11	0.47	0.15	0.38	1.18	0.59	3.48	0.25	0.08	4.85	0.14	0.27	1.54	0.32	1.71	4.38	2.08	0	5.65	3.68	2.55	2.52291	1.98722e-05	0.00117921
novel.12648	1519	0.16	0.48	0.14	0.05	0.11	0.05	0.1	0	0	0.09	0.73	0.1	0.11	0	0.05	0.05	0.33	0.36	0.31	0.75	1.18	0.17	0.6	1.13	0.62	0	0.52	1.03	0.38	0.19	0.4	0.26	0.4	0.15	0.31	1.55029	0.000449905	0.0117411
GeneID:419528	2099	1.15	2.75	0.88	0.68	2.57	4.35	0.84	1.23	1.7	2.46	2.36	0.98	1.42	1.01	0.76	2.25	3.91	5.98	2.06	8.32	5.87	3.54	8.22	9.07	7.44	1.83	6.68	6.01	4.77	6.17	6.61	7.15	6.49	9.17	3.88	1.47852	1.59726e-09	5.78185e-07
novel.12946	4276	0.15	0.08	0	0	0.14	0.18	0.05	0.03	0.05	0.17	0.32	0.09	0.08	0.09	0.04	0.2	0.38	0.09	0.02	0.49	0.22	0.14	0.49	0.48	0.25	0.04	0.47	0.41	0.13	0.19	0.18	0.47	0.29	0.46	0.08	1.16446	0.00249351	0.0386862
novel.9838	1931	0.48	0.51	0.38	0.04	0.16	0.44	0.15	0.04	0.08	0.78	0.29	0	0.16	0.58	0.18	0.23	0.65	0.53	0.04	0.94	0.84	0.34	0.98	1.18	0.65	0.14	0.74	0.97	0.78	0.64	1.05	0.46	0.97	1.1	0.46	1.14389	0.000540278	0.0134415
GeneID:395799	3827	0.92	2.24	1.01	0.72	1.77	0.69	0.9	1.53	2.67	1.7	1.29	0.78	5.06	0.74	0.55	3.19	2	1.43	3.73	3.82	5.28	3.8	1.04	5.11	3.33	1.63	3.37	5.78	3.95	5.04	5.03	2.65	4.1	7.37	2.89	1.27574	2.76887e-07	3.63186e-05
novel.14152	935	0.16	0.12	0.45	0	2.27	4.24	2.66	0	0.28	0.25	0.32	2.65	0	0	0.14	0	0.14	0.12	0	0.61	0	0	0.12	0	0.19	0	0	0	0.21	0	0	0.26	0	0	0	-3.66966	0.00016577	0.00578418
GeneID:107054484	1861	0.08	0.25	0.16	0.26	0.21	0.15	0.4	0.39	0.33	0.55	0.26	0	0.34	0.16	0.55	0.24	0.61	0.41	0.04	0.15	0.08	0.26	0.19	0.17	0.08	0.07	0.28	0.22	0.09	0.17	0.15	0.05	0	0.2	0.4	-1.14771	0.000934254	0.0196688
GeneID:770600	2365	0.06	0.03	0.12	0	0.38	0.4	0.12	0.12	0.19	0.11	0.07	0.06	0.09	0.39	0.03	0.86	0.71	0.27	0.19	0.79	0.32	0	0.43	0.18	0.18	0.29	0.4	0.72	0.31	0.57	0.37	1.17	0.67	0.43	1.08	1.19854	0.00329842	0.0465027
GeneID:112532337	1410	0.05	0	0	0.8	0.05	0.24	0.83	0.32	0.21	0.29	0.34	0.15	0.21	1.15	0.05	0.51	0.3	0.11	0.32	0.59	0.64	0.69	1.8	0.7	0.63	0.27	0.64	0.94	0.53	0.38	1.18	1.02	1.35	0.44	1.96	1.70326	1.24585e-06	0.000132818
GeneID:112530693	1926	2.63	0	2.47	0.15	0	4.33	0.19	0.08	1.37	0.14	0.04	0.04	0.12	0.4	0.99	0.31	0.28	1.1	0.08	0.04	0.22	0.13	0.13	0.23	0.19	0.15	0.08	0.03	0.11	0.21	0.08	0.08	0	0	0.08	-2.9339	9.91823e-07	0.000110436
GeneID:426202	3657	0	0	0.02	0	0.02	0.02	0	0	0	0.02	0	0	0.02	0	0	0.02	0.14	0.02	0.04	0	0.09	0	0.04	0.09	0.11	0.02	0.09	0.25	0.02	0.03	0.09	0.02	0.07	0.22	0.09	2.30859	0.000315793	0.00925329
GeneID:423347	2378	0.08	0.06	0.14	0.24	0.03	0.26	0.24	0.21	0.4	0.13	0	0	0.26	0.04	0.2	0.12	0.11	0.09	0.91	0	0.92	0.47	0.18	0.21	0.04	0.41	0.26	0.88	0.29	0.33	0.26	0.36	0.29	0.24	0.63	1.4023	0.000622414	0.0148791
GeneID:100858127	3465	0.41	1.86	0.61	0.52	0.79	2.28	0.61	0.33	0.78	0.34	0.6	0.42	0.68	0.69	1.18	0.39	0.93	0.91	1.42	1.84	3.52	0.39	1.51	1.61	0.87	0.72	1.29	6.51	0.51	0.34	0.69	4.62	4.6	1.86	0.96	1.20827	0.000219008	0.00717228
GeneID:428119	2542	0.23	0.09	0.63	0.35	0.26	0.34	0.25	0.52	0.37	0.13	0.33	0.3	1.13	0.81	0.45	0.14	0.09	0.5	0.06	0.09	0.53	0.31	0	0.14	0.22	0.08	0.11	0.18	0.33	0.2	0.11	0.14	0.38	0.03	0.39	-1.07952	0.00244127	0.0381067
GeneID:101751848	3718	0	0.05	0	0	0.03	0.02	0	0	0	0	0	0	0.02	0	0	0	0.02	0	0.03	0	0.12	0	0	0.03	0.02	0.01	0	0.03	0.06	0.06	0.04	0.14	0.03	0.36	0	3.14482	0.000255898	0.00799378
GeneID:107053039	3185	0.13	0.14	0.08	0.09	0.02	0.1	0.15	0.03	0.27	0.24	0.02	0	0.04	0.33	0.14	0.18	0.16	0.24	0.11	0.18	0.54	0.08	0.34	0.19	0.11	0.34	0.45	0.38	0.11	0.26	0.32	0.24	1.25	0.41	0.39	1.29327	0.000138738	0.00507418
GeneID:107050189	1480	0.73	0.76	1.86	0.73	1.09	0.71	1.07	0.21	0.54	0.24	0.35	0.24	0.97	1.37	2.07	0.62	0.66	1.24	2.07	2.79	2.74	1.85	2.19	2.96	6.6	1.98	6.09	1.82	1.05	0.63	2.36	1.47	1.99	2.87	2.76	1.60444	2.01196e-10	1.12013e-07
GeneID:421815	5064	0.16	0.15	0.07	0.05	0.08	0.02	0.04	0.17	0.03	0.15	0.06	0.06	0.08	0.06	0.14	0.05	0.12	0.14	0.24	0.07	0.6	0.03	0.35	0.17	0.33	0.13	0.26	1.53	0.11	0.1	0.11	0.68	1.01	0.48	0.47	2.00974	1.25995e-07	1.8568e-05
GeneID:112530950	1810	0.09	0.21	0.31	1.29	0	0.1	0.49	0.08	0.47	0.36	0.07	0	0.06	0.73	0.05	0.2	0.37	0.08	0	0.05	0	0.05	0	0	0	0.08	0	0.04	0.04	0	0.1	0	0	0.15	0.09	-3.11333	4.19392e-06	0.000352585
GeneID:427956	1904	2.31	2.29	0.28	1.06	0.36	1.37	0.47	0.15	0.4	1.86	0.68	0.45	1.31	1.31	0.56	2.18	2.22	1.58	0.16	0.48	0.52	0.13	0.32	0.19	0.35	0.51	0.99	1.27	0.54	0.57	0.72	0.51	0.65	0.54	1.13	-1.08051	0.000427705	0.0113389
novel.21498	1487	0	0.05	0.19	0	0.38	0.1	0.8	0.05	0.32	0.15	0.23	0.1	0.22	0.18	0.25	0.11	0.39	0.37	0.32	0.89	0.66	0.87	0.93	1.32	1.91	0	0.75	0.05	0.73	0.44	0.88	0.43	0.21	0.05	0.64	1.4859	0.000708423	0.0161788
GeneID:770710	9386	0.01	0.01	0.02	0.03	0.01	0.01	0.01	0.01	0.03	0.04	0.04	0.02	0.03	0.04	0.02	0.04	0.04	0	0.05	0.09	0.07	0.1	0.02	0.08	0.1	0.01	0.08	0.02	0.01	0.04	0.02	0.01	0.11	0.06	0.05	1.10586	0.00138705	0.0258363
GeneID:422468	3116	0.76	0.72	0.59	0.42	1.07	2.01	0.87	0.91	0.77	1.16	1.42	0.39	1.74	1.51	0.77	0.84	1.94	1.5	0.95	2.1	2	1.34	2.02	3.75	3.72	0.43	2.29	4.99	2.13	1.75	1.9	2.48	3.07	2.09	2.46	1.02329	3.0296e-07	3.89234e-05
GeneID:112532064	675	0.18	0.74	0	0.17	0	1.62	0.18	0.87	0.18	0.31	0	0	1.82	0.8	3.84	0	2.06	0.69	0.36	0.2	0	0.37	0	0.36	0.35	0	0.18	0	0	0	0	0.18	0.35	0	0.36	-2.3221	0.00129326	0.0245365
novel.6902	663	0.19	0.95	0.16	0	0.18	2.34	0	0.54	0.95	0.81	0.61	0.36	0.57	0.41	0	0	1.36	0.18	0.18	0	0	0	0.21	0.37	0	0.17	0.19	0.17	0	0.17	0	0.19	0.18	0	0	-2.39396	0.00041923	0.0111833
GeneID:768462	3814	0.11	0.34	0.59	1.27	0.68	3.07	2.65	0.14	0.35	0	0.71	0.14	1.11	0.69	1.07	1.09	1.6	3.26	10.39	0.88	2.58	1.56	1.08	27.23	1.92	1.36	3.23	2.68	0.32	1	1.48	5.31	0.59	5.12	0.19	1.46133	0.0022269	0.0358552
GeneID:107049633	1362	3.88	6.35	3.89	3.46	2.7	5.01	4.25	0.78	2.87	4.5	2.87	1.17	5.53	7.47	6.61	5.11	6.11	8.48	3	15.22	5.03	4.56	5.92	20.69	14.31	4.99	15.25	12.09	8.97	9.51	8.44	9.34	12.07	13.23	8.56	1.00768	1.5676e-06	0.000160298
GeneID:430126	4693	8.53	28.82	9.11	2.69	8.82	20.32	4.8	4.24	5.63	12.43	7.39	12.33	14.34	6.36	4.57	8.5	13.54	33.1	10.45	18.24	18.48	19.82	31.88	43.57	45.35	2.81	31.57	23.17	32.65	68.3	46.92	18.5	19.96	46.08	30.28	1.37295	3.433e-06	0.000299676
GeneID:112531306	2160	0.3	0.31	7.98	3.72	3.29	4.23	0.9	2.36	7.1	1.96	0.87	1.02	1.76	0.32	0.97	1.76	2.69	1.41	0.3	0.37	3.39	3.18	10.7	0.91	0.34	0.04	0.6	1.96	1.92	0.59	0.48	0.9	0.85	2.74	1.05	1.34888	0.000479839	0.0122736
GeneID:417058	1135	34.78	37.68	25.97	67.83	89.42	23.4	98.6	57.23	61.32	78.67	48.88	66.93	32.34	34.95	43.46	51.03	44.21	88.89	1.03	5.39	2.1	7.06	2.31	8.89	17.34	2.47	1.72	14.41	15.09	12.21	41.27	69.26	1.22	2.19	39.32	-2.17797	1.11142e-07	1.66733e-05
GeneID:107055422	1630	1.73	1.11	2	3.48	1.47	0.71	4.79	5.3	1.95	0.92	1.03	1.67	1.85	2.77	2.74	1.27	0.88	0.73	0.7	0.1	0.18	0.2	0.44	0.51	0.19	1.29	0.38	0.17	0.3	0.39	0.34	0.38	0.09	0.23	0.71	-2.44454	1.06402e-13	1.66605e-10
GeneID:107054637	1131	0.03	0.09	0.03	0.03	0.08	0.58	0	0	0.14	0.14	0.73	0.07	0.45	0	0	0	0.59	0.03	0	0.76	0.42	0.65	0	1.12	0.46	0.15	0.57	0.43	1.57	0.21	0.55	0.65	1.59	0.55	0.16	1.64166	0.000599952	0.0144943
novel.2019	2123	0.18	0.18	0.28	0.27	0.18	0.13	0.45	0.88	0.17	0.47	0.04	0.37	0.77	0.2	4.99	0.14	0.11	0.1	0.24	0	0	0.41	0	0	0.1	0	0.07	0	0.09	0	0	0	0	0	0.1	-2.32247	0.000109046	0.00422246
GeneID:395085	2681	0.59	0.59	1.31	1.26	3.73	1.2	0.52	2.07	0.96	0.27	0.45	2.5	0.6	0.97	0.76	1.15	0.65	1.51	0.75	1.03	0.69	0.48	0.51	0.9	0.69	0.6	1.03	0.41	1.08	0.62	0.55	1.19	0.54	0.51	0.36	-1.45856	0.000335455	0.00961573
GeneID:428763	2587	0.41	0.92	0.79	1.2	0.14	0.53	0.65	0.33	0.45	0.21	0.52	0.14	0.57	0.45	0.59	0.42	0.58	0.39	1.07	0.75	0.4	0.74	1.09	0.99	0.48	6.39	0.51	1.04	0.67	0.59	0.79	0.96	0.54	0.77	2.91	1.11268	0.000376732	0.0104406
GeneID:101749597	3703	0.27	0.61	0.68	0.29	0.39	0.65	0.01	0.27	0.16	0.46	0.71	0.36	0.42	0.58	0.16	0.43	0.67	0.63	0	0.77	1.05	0.36	1.53	0.81	0.94	0.41	1.05	1.39	0.81	0.85	1.44	1.9	1.16	1.11	1	1.12466	0.000169677	0.00588768
novel.22833	1370	0.24	0.37	0.69	0	0.18	0.56	0.3	0.17	0.24	0.37	0.19	0	0.59	0.34	0.39	0.33	0.36	0.54	0.3	0	0.22	11.78	0.52	0.06	0.7	7.12	0.19	9.27	0.71	0.11	0.19	0.66	0.23	13.72	8.32	3.32402	9.20699e-08	1.43269e-05
novel.13076	617	0.45	2.02	2.87	2.34	0	2.53	1.71	2.7	1.47	0.77	1.41	0.82	2.41	0.71	0	2.51	0.8	0.62	0.55	0	0	0	0	0.22	0	0	0.69	0	0	0.19	0	0	0	0.22	0.22	-3.77025	1.95165e-09	6.79425e-07
GeneID:107050412	1287	20.07	10.01	13.86	8.85	26.91	23.41	12.31	23.79	13.21	13.87	17.44	74.08	7.73	17.35	7.19	17.67	6.66	5.95	4.63	5.79	17.11	2.96	18.41	16.58	12.65	3.5	15.89	4.89	7.29	8.47	7.42	14.84	13.72	6.61	7.95	-1.05719	0.000469891	0.0121388
GeneID:407777	513	0	3.43	11.45	8.85	4.84	3.17	3.63	1.27	1.03	4.79	0	0.95	19.64	0	33.22	12.97	2.79	0.31	119.26	461.27	168.4	685.91	4.13	1.7	2.21	13.63	2.76	0.91	9.63	196.33	4.37	2.87	3.27	7.83	611.35	4.37067	5.74964e-08	1.0216e-05
GeneID:420407	502	4.79	8.36	21.79	10.17	8.04	3.25	2.03	0.68	1.11	2.52	1.17	2.38	60.41	1.52	33.49	57.95	14.06	1.34	336.69	1064.83	293.51	609.83	3.45	10.07	8.65	27.61	6.86	4.05	25.88	320.14	16.4	3.15	16	8.02	607.38	3.88414	5.45603e-08	9.8338e-06
GeneID:373926	1839	0.44	0.38	2.96	0.36	0.09	5.75	1.64	0.05	0.37	0.07	0.27	0.16	0.21	0.28	12.75	4.06	1.02	22.76	0.16	0.45	0.22	0.58	0.47	0.44	0.39	0.15	2.12	0.35	0.64	1.22	0.48	14.63	0.4	0.6	0.28	-2.44289	2.71738e-05	0.00148643
novel.21834	594	0	0	0	0	0	0	0	0	0	0	0	4.47	0	0	0	0.9	0	0	0.93	2.83	0	0.24	0	4.97	5.86	0	4.08	0	0.61	0.42	0.23	0	0	0	0	4.03429	0.00135026	0.0253203
GeneID:428963	2342	0.63	0.09	0.17	0.3	0.39	0.32	0.03	0.08	0.13	0.17	0.28	0.04	0.31	0.2	0.44	0.06	0.62	0.42	0.31	0.14	0.09	0.09	0.25	0.08	0.09	0.12	0.09	0.06	0	0.16	0.06	0.04	0.09	0	0.03	-1.53732	0.000173485	0.00596995
GeneID:107052067	2094	0.39	0.07	0.22	0.02	1.29	0.33	0.21	0.21	0.07	0.74	0.34	0.4	0.82	0.32	0.07	0.1	1.06	0.58	0.21	0.08	0.3	0	0.21	0.17	0.03	0.07	0	0.19	0.07	0.07	0.03	0.18	0.15	0.1	0.17	-1.79441	4.32344e-05	0.00208699
novel.22502	721	0.18	0.27	0.93	0	0	0	0	0.09	0	0.28	0.09	0	0.09	0.29	0.1	0.28	0	0.28	0.16	1.32	1.53	0.28	0.06	0.77	2.76	0	1.76	0.54	0.29	0.67	2	0.18	0.5	0.42	1.63	2.21583	3.73324e-05	0.00187809
GeneID:101751456	1688	15.9	25.42	17.48	28.31	32.75	10.28	15.2	20.41	19.73	29.82	4.51	20.49	4.91	17.12	28.65	40.21	3.72	22.79	4.46	16.02	23.23	16.66	2.47	14.44	16.51	6.46	3.84	1.82	4.78	15.95	5.23	6.16	13.09	10.73	2.85	-1.04307	0.00350404	0.0485546
GeneID:107054944	2495	0.09	0.12	0.03	0.08	0	0.03	0.09	0	0.09	0.05	0	0	0.09	0.2	0.32	0.06	0.15	0.03	0.17	0.06	0.24	0.12	0.36	0.45	0.4	0.11	0.32	0.26	0.29	0.16	0.19	0.11	0	0.39	0.08	1.42081	0.000660677	0.0154571
novel.6613	3444	2.21	1.55	1.95	1.25	0.65	1.39	0.58	1.62	1.12	1.02	1.75	1.17	1.77	1.42	1.31	1.22	4.29	1.03	0.5	2.03	8.27	2.65	2.99	2.13	1.73	3.51	6.54	4.67	4.92	0.39	1.26	3.05	2.47	5.84	2.51	1.03362	0.000184141	0.00623434
novel.1250	888	0.88	0.32	0	0	0	0	0	0	0.45	0	0	0	0	0	0	0	0	0	1.8	0.96	0	1.86	0.21	0.7	0.57	0	0.96	0	0.48	0.74	1.99	0.13	0.93	0	0	3.04674	0.00113665	0.0225599
novel.22697	1497	0.59	1.55	1.25	1.2	1.91	0.8	0.77	2.17	1.35	1.97	1.47	1.43	1.84	0.67	1.01	2.07	2.21	1.24	0.26	0.35	0.53	0.34	1.35	0.6	0.65	0.68	0.59	0.8	0.57	0.87	0.47	0.84	1.18	0.27	0.91	-1.24649	3.3282e-08	6.83453e-06
GeneID:100858997	1612	0.1	0.25	0.22	0.19	0.15	0.18	0.14	0.71	0.2	0.09	0.21	0.6	0.1	0.22	0.46	0.48	0.2	0.43	0.1	0.16	0	0	0.11	0.09	0.29	0.18	0.1	0.04	0.09	0.22	0.09	0.15	0	0.1	0.05	-1.52651	0.000154709	0.00549778
GeneID:112531453	2393	0.3	0.02	0.06	0.04	0.21	0.1	0.1	0.04	0	0.04	0.61	0.08	0.04	0	0.04	0.06	0.02	0.18	0.1	0	0	0.72	0.37	0.82	0.26	0.02	0.25	0.04	0.25	0.04	0.3	1.52	0.04	1.55	0.29	1.68903	0.00356733	0.0490963
GeneID:112532717	1561	0	0.16	0.14	0	0	0	0	0.05	0.11	0	0	0	0	0	0	0	0	0.1	0.11	0	0	0.06	0.31	1.43	0.58	0	0.54	0	0.34	0.24	0.26	0.16	0.88	0	0	3.12009	0.000519957	0.0130526
GeneID:427878	6628	0.4	0.05	0.62	0.03	0.08	0.77	0.18	0.08	0.16	0.13	0.21	0.02	0.11	0.27	0.04	0.65	1.02	1.18	0.28	0.87	0.45	0.89	1.09	0.86	0.6	0.05	1	1.12	0.76	1.33	0.51	1.06	0.55	1.2	0.72	1.19774	0.00275147	0.0413264
novel.4195	4127	0.22	0.62	0	0.03	0.05	0.91	0.1	0.02	0	0.46	0.39	0.09	0.43	0.21	0.2	0.21	0.41	1.57	0.1	0.04	0	0	0	0.38	0	0	0.25	0.03	0.01	0	0.02	0	0.06	0	0	-2.69836	0.00023516	0.0075435
GeneID:107054265	2206	0.12	0.08	0.37	0.04	0	0.15	0	0.55	0	0.14	0	0.07	0	0	0.04	0.04	0.13	0	0	0.08	0	0	0.04	0.04	0.04	0.04	0	0	0	0	0	0	0	0	0	-3.05132	0.000724063	0.0163863
GeneID:107049156	1867	0.11	0	0.07	0	0.05	0.29	0.51	0	0.08	0.29	0.3	0	0	0.29	1.68	0	0	0.07	0	0	0	0	0	0.07	0.07	0.07	0	0.05	0	0.03	0	0	0.14	0	0	-2.71183	0.00297329	0.0435527
novel.23524	1515	0.5	1.08	1.61	0.25	1.07	0.98	0	0.51	0.24	1.05	0	0.87	0.07	0.18	0.48	0.53	0.13	1.24	0.38	0.79	0.95	1.05	3.24	5.53	2.51	0.34	1.07	0.16	0.5	4.25	5.63	2.03	1.65	0.68	0.75	1.50784	0.001168	0.022991
GeneID:396144	4303	0.14	0.27	0.05	0.08	0.27	0.27	0.09	0.05	0.11	0.23	0.2	0.07	0.11	0.23	0.09	0.26	0.37	0.36	0.2	0.78	0.23	0.34	0.45	0.23	0.3	0.2	0.2	1.7	0.19	0.69	0.28	0.47	0.24	0.47	0.19	1.08509	0.00026426	0.00817347
GeneID:421296	3807	0.56	1.07	0.19	0.82	0.35	0.43	0.31	0.3	0.5	0.54	0.36	0.17	0.43	0.63	1.46	0.77	0.45	0.82	1.18	1.67	1	1.53	1.43	2.85	0.83	0.73	1.14	1.28	0.62	0.91	2.16	1.96	1.51	0.66	1.2	1.24962	5.71624e-08	1.0216e-05
novel.22744	425	0	1.51	0	0	0	0	5.53	0	1.09	0.29	1.61	0	1.05	0	0	5.23	1.08	1.82	11.28	5.71	0	16.14	2.74	19.25	12.21	20.95	17.41	5.16	10.7	9.57	25.43	18.81	0	12.08	8.86	3.0647	1.82429e-06	0.000182088
GeneID:107052166	7617	0.02	0.08	0.06	0.01	0.02	0.05	0.03	0	0.02	0.03	0.03	0.01	0.06	0.01	0.01	0.01	0.02	0.08	0.03	0.04	0.05	0.02	0.14	0.22	0.09	0	0.08	0.02	0.09	0.15	0.07	0.08	0.11	0.09	0.05	1.36552	0.000590572	0.0143368
GeneID:100857134	3786	0.44	1.14	0.51	0.49	0.41	1.1	0.28	0.77	0.51	0.96	0.44	0.12	0.92	0.73	0.36	0.31	1.45	0.79	1.16	2.21	1.64	1.27	1.7	2.49	1.33	0.5	1.01	2.39	0.81	1.11	1.12	0.83	3.21	0.45	0.43	1.10486	9.22958e-06	0.00065907
GeneID:107052493	1099	5.77	4.62	10.86	15.08	7.18	11.53	16.6	13.55	6.34	9.12	11.07	31.17	9.63	8.02	2.8	2.68	11.56	7.36	7.13	6.89	8.91	4.56	3.5	4.5	5.89	5.44	2.76	3.77	6.29	4.75	7.98	3.38	6.82	8.08	7.69	-1.00965	8.24448e-05	0.00339161
GeneID:107049082	3668	0.25	1.14	0.57	0.52	2.12	1.85	1.12	0.73	0.26	0.57	0.52	0.45	0.19	0.77	0.46	0.43	0.49	1.95	1.31	1.85	1.72	0.7	1.26	2.7	2.57	1.02	2.91	2.15	1.23	1.43	1.4	2.16	1.82	1.6	2	1.01756	0.000107294	0.00417399
GeneID:417547	3856	1.01	4.62	0.74	0.37	0.82	4.69	0.55	0.58	4.06	0.79	4.2	2.02	3.62	1.12	0.7	3.93	0.93	0.99	0.68	1.01	0.71	0.72	0.77	0.87	0.93	0.72	0.82	0.82	0.74	0.91	0.93	0.85	0.85	1.07	1.19	-1.27991	7.98895e-06	0.000589509
novel.4315	4521	0.14	2.41	0.11	1.1	0.2	0.18	1.91	0.84	1.47	0.11	2.04	0.11	1	0.02	0.27	0.07	2.42	0.23	0.12	5.69	1.46	3.77	2.95	5.58	5.33	1.92	4.04	2.58	3.61	1.1	1.54	1.95	3.44	2.79	1.51	1.77317	7.10202e-05	0.00304149
novel.23241	4016	0.09	0.09	1.13	0.13	0	0	0.12	0	0.02	0.12	0.02	0	0.14	0.1	0.05	0.12	0.04	0	1.52	0.11	0.44	0.2	0.06	0.13	0.42	0.19	0.2	0.15	1.5	0.35	0.23	0	0.13	0.31	0.47	1.922	9.59146e-06	0.000676887
novel.3230	5193	0.24	0.21	0.11	0.04	0.23	0.39	0.13	0.06	0.17	0.27	0.12	0.11	0.14	0.21	0.16	0.43	0.29	0.33	0.06	0.45	0.56	0.25	0.41	0.46	0.25	0.26	0.54	0.46	0.18	0.51	0.64	0.99	0.31	0.42	0.78	1.06485	3.24488e-05	0.00169362
GeneID:427633	4473	0	0.05	0	0	0	0.03	0	0	0	0	0	0	0	0.02	0	0	0.02	0.01	0	0.13	0.03	0.13	0.06	0.09	0.06	0.01	0.11	0.1	0.05	0.03	0.11	0.06	0.04	0.07	0.06	2.63781	1.26162e-05	0.00083839
novel.6493	977	0.48	2.4	0.84	0.09	1.53	2.99	0.19	2.23	1.04	1.17	1.73	0.88	2	0.32	0.62	2.03	4.59	5.57	0.27	7.04	7.16	0.7	5.6	3.91	2.49	0.79	2.28	11.85	1.35	2.48	3.48	13.32	5.55	6.34	9.01	1.47181	0.000358046	0.01003
GeneID:374105	7829	0.21	0.59	0.42	0.23	0.13	0.35	0.32	0.06	0.4	0.61	0.28	0.24	0.27	0.58	0.58	0.2	0.47	0.71	0.78	0.65	0.52	0.69	2.57	1.61	0.75	1.06	0.74	2.79	0.25	0.53	0.85	2.51	0.89	1.92	1.24	1.30786	1.75931e-08	3.93535e-06
novel.23541	1520	0.22	0.22	0.29	1.49	0.1	2.33	0.26	0	1.61	0.38	4.34	0.54	2.6	3.54	0.53	0.1	0.67	2.64	0.16	0.66	0.29	0.39	0.07	0.1	1.17	0.16	0.18	0.55	0.22	0.07	0.22	0	0.42	0.7	0.93	-1.83334	0.000511422	0.01289
GeneID:112531449	1963	0	0.08	0.07	0.04	0	0.07	0.28	0	0.22	0.07	3.48	0	0.04	0	0.07	0	0	0.43	0.14	0.04	0.04	0.49	0.13	0.66	0.15	0.04	0.15	0	0.31	0.07	0.29	1.74	0.11	1.18	0.11	1.94112	0.00224583	0.036021
GeneID:112531202	819	0.18	0.7	1.58	0	1.14	0.41	0.59	0	0.23	0.27	0.49	0	0.28	0.51	0.7	0.09	1.56	0.22	0.18	3.97	1.32	2.58	5.55	2.7	5.47	0.27	10.68	0.3	0.23	0.19	0.52	5.32	2.69	0.93	1.01	2.31001	2.99155e-05	0.00159462
novel.1590	1784	1.44	1.77	2.05	1.73	0	1.43	0.6	0.19	0.77	2.15	1.46	0.19	1.61	2.97	2.19	0.79	2.49	0.94	0.52	1.24	7.27	6.87	2.18	2.53	2.27	3.64	3.38	4.46	4.52	1.34	4.09	2.17	2.02	3.89	2.45	1.21449	0.000202256	0.00674717
GeneID:421534	1480	15.06	21.89	11.71	25.72	61.93	22.42	94.04	120.01	81.19	39.27	22.72	28.43	11.17	37.02	48.77	25.29	23.77	29.26	32.25	23.79	17	9.66	16.52	21.43	17.47	9.05	15.91	14.62	27.92	12.31	28.43	14.37	23.11	25.48	8.22	-1.24543	8.00037e-06	0.000589509
novel.4846	206	577.62	2996.18	197.97	468.82	3843.17	840.7	613.88	1070.81	147.46	50.03	172.16	4672.98	417.63	25.13	110.38	158.12	939.66	371.53	264.09	620.68	546.14	90.88	344.02	485.54	207.96	477.01	258.02	187.36	284.4	194.55	356.72	855.49	484.1	1461.87	521.33	-1.46794	0.00315427	0.0451565
novel.12900	1784	0	0	0	0	0	0.04	0	0	0	0.04	0.05	0	0	0.05	0	0	0.18	0.04	0.04	0	0.2	0	0.1	0.04	0.97	0	0.09	0.15	0.04	0	0.12	0.13	0.12	0.08	0.08	2.499	0.00176691	0.030278
GeneID:107049114	1873	0	0	0.05	0	0.66	0.81	0	0.18	0	0.39	0.12	9.16	27.65	0	0.03	0.13	0	0	1.15	98.93	1.77	0	0.93	0	0.28	0.26	0	2.32	8.48	60.12	27.6	56.36	0	4.76	5.09	4.09047	1.81554e-05	0.00111756
GeneID:107053636	6536	0.12	0.1	0.04	0.12	0.07	0.19	0.07	0.14	0.16	0.1	0.17	0.12	0.15	0.09	0.11	0.09	0.07	0.05	0.05	0.07	0.07	0.07	0.1	0.02	0.02	0.09	0.02	0.09	0.08	0.05	0.07	0	0.03	0	0.02	-1.21906	3.86699e-05	0.00192604
novel.19861	653	0.36	0	1.28	0	0.62	0	0	0	0	0.38	0	0	0	0	0	1.48	0.68	0.34	0.44	0	1.04	6.74	1.92	0	0.33	0.84	0.84	0.4	0.76	1.11	2.35	2.78	0.35	2.4	2.84	2.38089	0.000716553	0.0162902
GeneID:107054242	2208	1.75	2.66	3.02	1.79	2.71	3.25	2.76	1.56	2.36	1.22	3.22	1.96	1.51	2.03	2.36	2.36	1.88	3.09	5.36	5.68	2.97	8.69	6.5	3.94	3.86	5.24	8.61	3.02	7.39	6.32	5.76	4.72	2.57	3.42	6.27	1.14179	5.80005e-13	8.07271e-10
GeneID:428832	1737	28.53	8.59	63.65	71.52	8.64	10.54	41.46	60.7	49.61	14.46	19.49	48.13	39.66	21.92	37.23	10.05	7.95	13.5	29.55	5.55	4.77	31.89	7.22	4.5	9.86	77.49	6.15	1.5	9	7.79	6.02	4.63	9.96	2.94	17.75	-1.2087	0.00356861	0.0490963
GeneID:414847	4231	0.04	0.01	0.02	0.02	0.01	0	0.01	0.03	0.01	0	0.01	0	0	0	0.02	0	0.05	0	0.13	0.1	0.04	0.03	0.05	0.05	0.02	0.07	0.11	0.03	0.02	0.08	0.06	0.05	0.15	0.08	0.2	2.51559	4.95268e-08	9.05689e-06
GeneID:420046	2471	0.19	0.27	0.13	1.01	2.98	0.39	1.45	0.53	0.18	0.29	0.46	0.46	0.03	2.89	3.07	0.26	0.31	0.28	0.26	0.1	0.05	0.26	0.34	0.14	0.2	0.14	0.15	0.26	0.16	0.11	0.23	0.09	0.22	0.29	0.32	-2.2581	7.16452e-07	8.27156e-05
GeneID:419914	1892	2.96	8.87	5.98	10.68	1.18	2.12	8.76	12.76	8.52	5.52	1.28	1.74	24.03	1.86	2.27	7.7	4.04	0.59	76.66	6.28	59.15	24.71	9.43	11.86	4.35	32.27	11.86	17.97	21.35	7.81	10.92	16.72	5.87	14.23	47.72	1.7978	6.63433e-06	0.000512993
novel.4328	446	0	0.53	0	0	0	0	0	0	0	0	0	0	0	0.54	0	0	0	0	0.51	1.7	1	0	1.72	1.08	3.91	0.49	3.41	0.46	0	0.02	0	0.56	1.54	0	0.52	2.90513	0.00143713	0.0264933
GeneID:107053233	6945	0.07	0.27	0.22	0.24	0.35	0.29	0.17	0.17	0.36	0.04	0.15	0.15	0.21	0.08	0.26	0.01	0.26	0.02	0.01	0.06	0.18	0.08	0	0.01	0.03	0.01	0	0	0	0	0.02	0	0	0.02	0.18	-2.56767	6.74089e-06	0.000516451
novel.7487	4953	0.36	1.36	0.35	0.23	0.94	2.13	0.41	0.96	0.25	0.32	0.7	0.07	0.54	0.52	0.28	0.68	1.13	1.79	0.28	1.87	1.32	1.48	4.35	3.99	3.68	0.03	1.97	2.43	1.87	2.7	2.14	1.89	2.28	1.92	1.39	1.05588	0.00220041	0.035704
GeneID:112532627	818	40.76	141.62	45.87	30.56	8.6	74.58	14.58	9.49	28.87	45.73	44.3	13.66	32.71	59.92	8.49	50.3	84.77	153.12	31.16	115.95	153.83	74.25	143.39	28.03	133.06	35.25	78.43	202.34	137.42	75.64	112.3	174.63	143.35	245.99	40.54	1.1133	0.000369968	0.0102987
GeneID:768786	1490	0.12	0.18	0.8	1.71	0.53	0.79	0.83	0.96	0.57	0.6	0.88	1.08	0.24	1.09	0.66	0.22	0.27	0.11	0.21	0.2	0.27	0.12	0.36	0.11	0.14	0.5	0.47	0.33	0.3	0	0.55	0.31	0.4	0.12	1.2	-1.15251	0.002976	0.0435527
novel.6209	6209	0.16	0.12	0.24	0.79	0.17	0.14	0.22	0.26	0.14	0.15	0.23	0.09	0.09	0.21	0.48	0.15	0.18	0.03	1.55	0.23	0.32	0.83	0.65	0.52	0.44	0.42	0.26	0.86	0.14	0.13	0.11	0.49	0.2	0.43	0.49	1.07338	0.0012957	0.0245546
GeneID:427746	1871	107.38	17.64	84.96	44.45	37.17	10.62	39.55	33.47	36.96	47.38	38.47	133.61	81.71	87.2	30.87	129.94	18.06	45.18	41.1	82.1	5.58	19.59	5.44	24.96	11.1	9.85	26.79	20.37	16.31	41.17	37.77	56.66	2.66	2.3	32.81	-1.2256	0.000258536	0.00805608
GeneID:107049918	1580	0	0.15	0	0	0	0.04	0	0	0	0	0.09	0.16	0	0.04	0.06	0	0.04	0.04	0.11	0.09	0.13	0	0.32	0.51	0	0.1	0.29	0.24	0.27	0.62	0.02	1.32	0.1	2.52	0.38	4.06633	5.2696e-08	9.56661e-06
novel.23011	296	0	0	0	22.17	15.11	0	3.48	6.76	0	2.65	0	0	0	53.39	5.9	5.98	3.79	3.1	0	0	3.78	2.93	0	0	0	3.42	0	0	0	0	0	0	0	0	0	-3.18039	0.00200667	0.0334234
novel.13207	7848	0.28	0.17	0.25	0.29	0.26	0.47	0.31	0.04	0.27	0.3	0.6	0.11	0.29	0.32	0.28	0.38	0.5	0.31	0.63	1.13	0.82	0.7	0.51	1.06	1.08	0.33	1.31	0.92	0.74	0.91	0.31	1.54	1.03	0.95	0.92	1.47006	7.14638e-14	1.19359e-10
GeneID:416086	3884	0.04	0.12	0.2	0.15	0.06	0.08	0.05	0.05	0.11	0.16	0.04	0.04	0.05	0.1	0.11	0.25	0.16	0.14	0.11	0.26	0.38	0.11	0.22	0.41	0.3	0.12	0.6	0.45	0.51	0.17	0.46	0.49	0.05	0.24	0.19	1.30811	2.29728e-06	0.000214759
GeneID:396292	4217	89.7	50.92	177.49	126.93	58.63	34.9	216.13	117.52	256.57	70.95	81.87	49.51	73.14	117.64	170.21	59.76	53.6	56.75	26.95	38.37	49.79	26.16	35.92	29.8	42.55	90.91	30.27	37.81	33.84	23.14	35.8	34.62	35.08	35.56	91.98	-1.41076	4.8957e-09	1.51422e-06
GeneID:107051372	1209	0	0	0	0	0	0	0	0	0	0	0.12	0	0	0	0	0	0.04	0	0.07	0.06	0	0	0	0.93	0	0.07	0	0.09	0.15	0.49	0	1.63	0.17	1.76	0.33	4.48528	1.8607e-05	0.00113976
GeneID:396149	4640	0.18	0.82	0.18	0.26	1.2	0.34	0.19	0.1	0.16	0.9	0.26	0.18	0.82	0.22	0.36	0.59	1.38	1.19	0.27	0.35	0.07	0	0.3	0.16	0.44	0.05	0.01	0.4	0.08	0.12	0.61	0.4	0.53	0.17	0.09	-1.19366	0.00312985	0.0449704
GeneID:416340	4803	0.22	0.24	0.47	0.23	5.02	0.54	0.82	3.11	0.74	0.45	0	8.29	0	0	0	0.66	0	0.57	0	0	0	0	3.27	0	0	0.11	0	0	0	0	0	0	0	0	0	-5.88391	1.40161e-06	0.00014517
GeneID:100858258	554	2.22	7.29	3.1	4.2	14.71	7.33	7.02	8.3	7.97	0.75	3.85	22.49	6.56	5.95	4.48	4.59	4.44	4.85	0.18	0.61	2.61	1.02	5.09	1.97	2.46	1.84	3.16	7.7	2.56	0.96	1.38	7.86	1.61	2.17	0.83	-1.55143	4.96765e-05	0.00232191
novel.24271	2614	0.57	0.5	0.32	0.13	0.11	0.52	1.41	0.05	0.27	0.2	0.24	0.03	0.74	2.19	2.21	0.08	0.28	0.11	0.16	0.18	0.1	0.06	0.19	0.42	0.38	0.13	0.19	0.12	0.12	0.27	0.05	0.22	0.1	0.21	0.3	-1.63385	0.000154513	0.00549778
GeneID:420386	7262	0.06	0.31	0.25	0.05	0.44	0.24	0.22	0.13	0.94	0.28	0.41	0.04	0.07	0.09	0.38	0.11	0.41	0.44	0.23	0.46	0.28	0.05	1.43	2.13	0.87	0.9	1.11	0.92	0.25	0.52	0.55	0.87	0.73	0.45	0.52	1.45368	4.15635e-05	0.00202586
novel.16647	2307	0.6	0.46	0.64	0.06	0.35	0.28	0	0.18	0.32	0.18	0.48	0	0.73	0.58	0.39	0.28	0.56	1.05	1.43	0.17	1.45	0.51	0.59	1.23	0.62	1.05	0.09	1.44	0.63	0.81	0.98	0.91	0.91	0.52	0.71	1.03662	0.00189666	0.0320628
novel.24123	505	3.26	0.36	1.81	0	0	5.16	4.53	2.01	0	2.07	0	2.01	0	0.38	0	0	1.84	0	0	0	0	0.35	0	0	0	0	0	0	0.6	0	0	0	0	0.36	0	-3.83441	0.000147434	0.00529936
novel.1468	1918	1.63	0.96	1.68	8.44	1.17	0.44	2.16	4.5	2.25	1.48	3.44	2.06	2.35	1.45	1.83	3.59	0.91	0.68	1.77	0.94	0	1.38	1.44	1.59	0.77	0.64	1.3	0.85	0.87	0.37	0.25	1.48	0.26	0	0.5	-1.62335	3.88476e-05	0.00193105
GeneID:395737	2115	1	0.4	0.62	3.07	8.96	1.17	2.35	0.33	0.77	1.24	0.85	0.34	0.37	6.09	4.18	0.56	1.39	1.37	0.83	2.07	0.46	0.92	0.54	0.62	0.85	1.6	1.18	0.83	0.28	0.44	0.57	1.26	1.26	1.55	0.76	-1.12341	0.00310948	0.04486
GeneID:415515	6523	0.33	0.61	0.14	0.01	0.3	1.02	0.1	0.1	0.3	0.37	0.24	0.2	0.08	0.22	0.29	0.17	1.16	1.05	0.04	1.34	0.77	0.16	1.85	2.04	0.88	0.19	1.23	2.81	0.58	0.75	0.47	2.67	1.5	1.52	0.22	1.55344	0.000172314	0.00595446
GeneID:769410	8028	2.15	2.57	2.89	4.82	0.58	1.79	5.46	9.16	9.34	4.63	0.77	1	8.8	1.45	1.54	2.61	2.11	0.96	11.88	2.44	15.25	8.72	4.1	4.26	2.61	14.34	7.27	11.88	9.03	5.35	7.73	11.04	5.18	6.61	13.26	1.1758	0.000307347	0.00905877
GeneID:417738	3637	0	0.08	0.02	0.04	0	0.06	0.04	0	0.07	0.08	0	0.02	0.09	0.03	0.06	0	0.17	0	0.15	0.1	0.16	0.03	0.07	0.32	0.13	0.06	0.2	0.02	0.22	0.06	0.31	0.19	0.21	0.06	0.13	1.85004	5.05563e-05	0.00235864
GeneID:112532646	879	0.15	1.18	0.46	0.88	0.07	2.26	0.12	0.07	0.91	0.72	0.66	0	0.72	0.38	0.8	0.61	2.43	0.19	0.7	0.87	1.23	0.75	2	6.81	6.53	0.43	5.96	1.38	1.73	0.9	1.53	2.26	1.93	4.12	1.39	1.44151	0.000389076	0.0106298
novel.5249	1606	1.98	3.32	1.3	3.64	9.3	3.86	5.56	8.26	3.11	0.57	1.12	2.26	1.91	6.75	4.44	0	4.34	5.17	1.68	1.98	1.15	1.43	1.84	0.38	0.83	3.55	0	2.08	0	1.54	2.47	0.74	1.2	1.73	0.69	-1.56232	0.000411418	0.011046
GeneID:395947	8003	0.12	0.42	0.12	0.05	0.13	1.21	0.07	0.06	0.12	0.48	0.7	0.16	0.28	0.07	0.27	0.09	0.39	1	0.16	1.12	0.99	0.39	1.37	1.24	1.83	0.23	0.79	1.43	0.74	0.86	0.53	1.84	2.52	1.94	0.46	1.72443	2.42757e-06	0.000225252
GeneID:395953	2002	0.11	0.57	1.03	1.32	0.26	0.7	3.81	0.36	4.75	0.98	1.85	0.43	1.27	0.55	0.8	2.31	2.51	0.94	5.06	3.36	5.37	6.12	4.11	3.67	3.68	5.85	3.87	4.26	3.62	4.97	4.88	4.52	4.72	4.58	4.84	1.69012	3.83403e-09	1.24746e-06
GeneID:112533463	949	0.49	0.44	0.59	7.15	0	11.25	0.38	0.09	0.38	0.9	8.47	0.05	0	0.43	0.09	12.05	0.69	0.28	0	0	0.4	5.8	0.05	0.05	0	0	0	0.04	0.13	0	0	9.88	0	0	0	-2.58585	4.52482e-05	0.00216225
GeneID:422771	9785	0	0	0.05	0	0.12	0.02	0.01	0	0.05	0.22	0.01	0	0.03	0.06	0	0	0.03	0.83	0.17	1.15	0.09	0.08	0.05	0.66	0.43	0.02	0.56	0.45	0.53	0.32	0.12	0.08	0.14	0.41	0.17	2.06259	0.00251347	0.0388944
GeneID:424184	10229	0.02	0.01	0	0	0	0.03	0.01	0	0.03	0	0	0	0	0	0	0	0.01	0.01	0.01	0.06	0.02	0.01	0.02	0.14	0.04	0	0.03	0.07	0.02	0.02	0.01	0.11	0.04	0	0	2.57143	0.000262141	0.00813808
GeneID:417965	17576	0.08	0.3	0.03	0.01	0.24	0.12	0.01	0.02	0.1	0.49	0.16	0.03	0.04	0.05	0.04	0.23	0.15	0.13	0.02	0.68	0.57	0.02	0.1	0.48	0.54	0	0.5	0.3	0.19	0.59	0.43	0.34	0.47	0.37	0.28	1.40496	0.00164018	0.0287554
GeneID:112532537	20518	0.07	0.05	0.02	0.02	0.02	0.1	0.03	0.01	0.03	0.06	0.06	0.03	0.02	0.03	0.04	0.06	0.04	0.15	0.05	0.08	0.04	0.17	0.08	0.17	0.19	0.04	0.15	0.04	0.12	0.17	0.23	0.08	0.04	0.03	0.11	1.12514	0.00021803	0.00716837
GeneID:107050186	1240	0.34	2.04	0	0	0	0.27	0.54	0.09	0.68	0.28	0.57	0	0.22	0.1	0	0	0.48	0.22	0.1	0	0.36	0.11	0	2.72	0.58	2.26	1.34	2.43	0.3	0.42	0.81	3.52	0.91	1.47	3.86	1.9884	0.00192611	0.0324293
GeneID:112530115	2380	1.1	1.6	0.69	0.88	11.1	1.68	2.44	2.5	1.53	0.23	1.78	4.51	1.44	0.49	1.22	1.15	3.24	0.98	0.82	1.87	1.42	0.29	1.29	1.52	0.64	0.34	0.61	1.61	0.35	1.04	1.04	1.72	1	1.55	1.1	-1.22883	0.000756474	0.0169516
GeneID:414340	604	0	0.23	0.59	0.22	0	0	0	0.22	0	0.2	0	0.65	0.46	0	0.42	0.87	0.71	0	3.13	3.73	3.66	6.5	0	0.68	0.43	0.64	0	0	0	2.63	0.22	0	0.22	0	4.51	2.52319	0.00149921	0.0272171
GeneID:112531246	1172	0	4.93	4.11	3.82	0.07	4.13	2.25	4.39	1.54	0	2.09	1.87	1.83	1.7	0	1.92	0.08	3.12	0	0	0	0	1.07	0	0.07	0	0	0.07	0	0	0	0	0	0	0	-5.08765	3.40326e-09	1.13682e-06
GeneID:107053714	3943	0.13	0.06	0.1	0.12	0	0	0.08	0.54	0.16	0.02	0.06	0	0.04	0.15	0.45	0	0.02	0.13	0.36	0.06	0.02	0.34	1.15	4.66	2.35	0.02	0.21	0.07	0.13	0.42	0.21	0.09	0.18	0.08	0	2.25077	0.000888329	0.0189407
GeneID:107052350	822	0.91	0.92	0.22	0.6	0.5	0	0.63	0.98	0.38	0.11	0.27	0.6	0.64	0.14	0.24	0.49	0.26	0.24	0.25	0.28	0.6	0.13	0	0.12	0.49	0.35	0	0.35	0	0.23	0.12	0	0.12	0.13	0	-1.3752	0.00312483	0.0449704
GeneID:112532346	7410	0.06	0.01	0.15	0	0	0.14	0.14	0.1	0.05	0.03	0	0.01	0.1	0.08	0.05	0.03	0.11	0.16	0.11	0.12	0.12	0.91	0.05	0.26	0.33	0.03	0.19	0.3	0.31	0.2	0.41	0.26	0.07	0.13	0.37	1.82456	1.76169e-05	0.00109726
GeneID:395118	2251	1.4	2.36	4.4	4.11	1.26	1.5	3.96	4.35	9.57	4.69	0.94	0.88	8.71	1.73	1.13	1.74	1	1.01	11.75	1.44	15.25	13.92	2.08	3.59	2.79	14.3	6.51	10.31	10.09	4.3	8.26	8.54	2.87	6.21	13.7	1.19449	0.000136749	0.00500872
GeneID:396013	5098	0.05	0.16	0.02	0	0.04	0.23	0.01	0.04	0.12	0.05	0.04	0	0.09	0.12	0.09	0.1	0.08	0.13	0.01	0.2	0.16	0.09	0.38	0.38	0.31	0.05	0.17	0.3	0.18	0.21	0.15	0.37	0.17	0.43	0.06	1.4186	8.53379e-05	0.00349341
GeneID:396471	1037	0.63	2.49	6.21	6.38	2.4	1.61	2.05	0.32	0.77	5.09	0.28	0.84	12.79	0.49	22.11	17.67	2.15	0.51	87.6	345.12	157.42	519.63	0.6	2.92	1.54	9.47	2.27	1.37	4.87	129.75	4.72	2.64	2.62	2.33	305.82	4.26734	1.07675e-08	2.64469e-06
GeneID:107049638	3945	0	0	0.02	0	0	0	0.02	0	0	0	0.08	0	0	0	0.02	0	0.02	0.05	0.02	0.19	0.13	0	0.05	0.42	0	0.05	0.12	0.16	0.23	0.19	0.02	1.69	0.07	1.72	0.18	4.86363	6.44106e-09	1.81312e-06
novel.15560	1558	1.09	1.03	0.27	0.97	0.2	0.76	0.15	0.05	0.15	0.64	0.16	0.1	0.87	0.46	0.33	0.65	0.79	0.79	0	0	0.62	0	0.17	0	0.1	0.28	0	0.05	0.14	0.55	0	0	0.05	0.5	0.1	-1.83278	0.000378581	0.0104802
GeneID:112532884	3138	0.07	0.07	0.14	0	0	0.27	0.07	0	0.09	0.1	0.12	0.06	0.13	0.15	0.06	0.09	0.32	0.15	0.07	0.32	0.37	0.39	0.54	0.6	0.37	0.14	0.53	0.52	0.3	0.46	0.3	0.24	0.34	0.5	0.31	1.75039	1.60029e-09	5.78185e-07
GeneID:107053185	1540	4.58	6.31	7.8	9.61	18.17	5.78	17.97	20.94	12.7	7.94	5.66	17.19	17.8	17.44	12.92	5.5	10.42	4.22	7.33	7.25	2.53	4.61	5.79	7.3	6.83	2.98	2.41	1.32	4.27	3.05	2.84	4.19	2.78	3.02	2.17	-1.75055	4.9658e-13	7.31814e-10
GeneID:416699	3153	0.45	0.31	0.23	0.09	0.37	0.47	0.16	0.33	0.31	0.28	0.33	0.12	0.3	0.3	0.21	0.25	0.94	0.45	0.63	0.68	0.91	0.38	0.36	2.37	1.35	0.12	0.75	0.53	0.8	0.46	0.85	0.44	1.12	0.17	0.2	1.07155	0.00024817	0.0078602
GeneID:396491	498	330.96	327.96	356.62	519.84	521.62	345.82	1176	597.95	551.15	205.32	276.07	661	338.31	281.68	553.53	153.01	225.97	250.03	199.27	128.4	124.47	175.72	127.16	98.07	111.54	356.43	136.17	92.15	143.6	177.74	102.88	159.37	168.61	86.32	188.33	-1.63912	5.79925e-12	5.18887e-09
GeneID:423134	644	0	0.4	0	0.19	0	0.18	0.2	0	0	0	0	0	0	0	0.37	0	0.21	0.19	1.17	6.08	2.62	1.23	0	1.18	0.38	0	0	0	0	1.59	0	0	0	0.2	0.98	3.12273	0.00101336	0.0208437
GeneID:107049353	2662	0.67	4.21	2.58	0.07	0.15	8.08	0.18	0.71	1.5	4.05	1.94	1.85	0.04	3.11	0.49	0.47	0.68	1	0.94	4.72	0.38	6.57	6.93	5.99	6.12	0.48	3.49	4.05	4.5	8.21	4.88	5.15	1.19	5.22	2.68	1.22186	0.00319469	0.0454753
GeneID:100858840	1704	0.12	0.5	0.04	0.08	0	0.16	0.12	0.12	0.2	0.31	0.76	0.36	0.08	0.4	0.35	0.12	0.04	0.18	0.74	0.75	0.4	0.3	1.77	0.83	0.77	1.19	0.58	1.02	1.18	1.08	1.37	0.68	0.63	0.28	0.67	2.12061	6.51163e-10	2.76501e-07
novel.10567	287	0	0	0	0	0	0	0	3.87	0	0	0	4.27	4.2	0	3.33	0	22.7	3.72	8.47	23.51	41.09	9.73	18.29	82.96	80.81	4.1	77.53	4.02	22.23	19.63	14	10.89	35.21	39.29	4.22	3.62627	7.08424e-08	1.1992e-05
GeneID:112531512	3044	0.02	0.1	0.08	0.18	0.09	0.05	0.1	0.11	0.15	0	0.03	0.08	0.06	0.04	0.27	0.03	0	0.06	0.47	0.2	0.22	0.06	0.18	0.18	0.31	0.37	0.27	0.14	0.12	0.16	0.3	0.14	0.37	0.04	0.11	1.20286	0.000625011	0.0149128
GeneID:107050925	1668	1.89	10.54	7.59	3.69	3.11	4.62	2.69	2.47	4.09	7.04	4.24	2.38	4.36	5.43	4.49	3.83	9.41	4.43	5.68	8.26	5.95	9.74	12.24	10.1	26.03	4.21	18.48	12.02	5.93	9.04	10.44	17.17	13.59	10.03	7.38	1.27222	2.16642e-07	2.96587e-05
GeneID:112532626	1790	1.6	0	0	0.07	0	0.96	0	0.02	0	0.27	0.83	0	0.03	0	0.31	3.84	3.6	0.96	0.53	0.9	3.1	0	0.61	21.55	1.03	0	9.03	1.92	0	1.54	0.77	7.47	0	6.09	0	3.36031	0.000657088	0.0153998
novel.2034	3727	0.04	0.81	0.03	0.83	0.07	5.14	0.93	2.4	0.83	0	0.89	1.33	1.03	0.84	1.87	0.04	1.33	0.04	0.6	0.08	0	0.04	0.07	0.07	0	0	0	0.02	0.8	0.46	0.12	0	0.02	0.09	0.05	-2.80812	6.54526e-05	0.00284305
GeneID:770867	4542	1.5	1.55	2.15	1.46	1.06	1.46	1.2	1.17	3.09	1.74	1.17	0.6	1.87	2.13	2.05	1.07	1.55	4.62	0.56	1.39	0.92	6.4	5.17	18.73	1.34	0.49	5.85	2.26	2.45	1.71	7.21	11.48	0.79	11.31	2.02	1.74567	5.48226e-06	0.000433272
GeneID:427029	914	59.43	16.1	64.38	65.01	42.88	25.74	58.25	76.19	41.37	17.47	29.66	60.31	62.21	29.52	73.93	12.57	7.87	12.88	32.29	11.62	38.84	27.72	4.74	7.12	5.07	51.21	10.41	9.86	14.92	6.5	24.08	7.29	12.48	9.34	19	-1.5747	1.60276e-06	0.000163228
novel.11376	2059	0.11	0.11	0	0.17	0	0.51	0.11	0	0.07	0	0.04	0.03	0.18	0	0.1	0.43	0.67	0.56	0.11	0.12	0.13	0.16	0.87	1.27	0.96	0.1	0.32	0.8	0.26	0.79	0.45	1	0.21	0.84	0.18	1.50226	0.00271402	0.0409358
GeneID:112533567	888	2.64	1.74	1.69	2.18	0.05	1.42	1.55	0.39	0.98	2.18	0.43	0.09	0.95	0.78	0.38	1.04	0.46	0.36	3.64	2.59	0.92	12.06	5.07	16.73	1.95	7.02	0.59	10.48	1.87	1.13	9.98	23.3	3.13	3.22	13.77	1.47262	3.97019e-05	0.00196961
GeneID:112532704	5115	0.08	0.15	0.26	0.13	0.11	0.09	0.38	0.11	0.22	0.26	0.17	0.02	0.24	0.33	0.26	0.14	0.11	0.01	0.43	0.83	0.33	0.27	0.15	0.53	0.12	0.3	0.56	0.86	0.21	0.31	0.41	0.63	0.44	0.32	0.33	1.20826	1.18197e-05	0.000792449
GeneID:396119	2461	0.48	1.07	0.73	8.2	0.52	0.24	3.76	0.78	1.25	0.82	0.42	1.12	0.45	0.73	3.95	0.35	0.86	0.43	1.73	0.71	0.23	0.34	0.48	0.28	0.67	7.23	0.16	0.63	0.32	0.13	0.26	0.28	0.63	0.17	0.09	-1.75705	4.35055e-05	0.00209605
novel.27	962	0.71	0.3	1.48	1.88	0.39	1.09	1.56	0	0.99	0.18	0.64	0.09	2.48	1.66	1.56	0.96	0.72	0.86	0	0	0.09	0.31	0.11	0.19	0	0.64	0	0.09	0.35	0.18	1.44	0	0	0.29	0.1	-2.16894	3.39401e-05	0.0017532
novel.20590	1486	0.3	0.54	4.18	0.6	3.82	0.54	1.38	4.57	1.28	1.29	0.81	0.7	0.48	0.63	3.32	1.75	4.74	7.22	1.08	0.81	1.05	0.13	1.49	8.4	1.35	0.43	0.29	0.31	2.09	0.03	1.02	0.23	2.45	5.47	2	-1.29845	0.0015693	0.0279827
GeneID:415851	2284	1.63	1.62	1.99	9.6	1.65	2.3	5.29	3.13	4.51	0.9	1.75	4.39	3.21	2.52	3.75	1.95	1.32	1.37	2.31	0.84	1.19	1.93	1.91	0.75	0.76	4.38	0.8	0.63	1.13	1.22	1.2	1.05	1.9	0.75	1.51	-1.13767	0.000116525	0.00440318
GeneID:417057	1502	0	0	0	0	0	0	1.27	0	0.22	0	0.02	0	0.98	0.44	0.07	0.3	0	0.45	0.43	2.3	0.1	0.99	2.46	0	0.29	1.68	1.22	4	0.21	3.95	3.25	1.49	0.07	1.72	2.62	3.97511	4.67535e-08	8.73099e-06
GeneID:418228	7349	1.36	3.97	0.86	0.53	1.49	3.45	0.55	0.46	0.92	3.15	2.9	1.25	0.97	1.61	1	1.7	4.43	3.72	0.63	5.83	4.41	1.18	5.61	6.54	6.47	0.48	4.79	5.72	3.71	2.89	3.56	4.73	6.81	6.64	1.69	1.0331	0.000429515	0.0113509
GeneID:428114	560	9.41	50.92	8.53	18.29	9.47	18.61	49.91	64.6	44.54	18.08	3.82	11.79	26.27	3.76	4	19.96	64.86	8.62	61.22	44.83	513.35	27.05	438.23	172.42	35.98	118.19	206.29	487.21	192.31	121.26	116.95	457.96	191.88	585.61	422.75	3.20862	3.34421e-16	6.44481e-13
novel.7674	871	0.12	0	0.1	0.44	0	0.21	0.46	0	0.23	0.41	0.5	0.11	0.12	0.26	0.32	0.34	0.6	0.11	0	0.13	0	0.12	1.18	1.25	0.45	0.64	0.69	0.93	0.41	0.1	2.47	1.39	0.89	0.57	0.45	1.42773	0.00265252	0.0403704
GeneID:100857227	4681	6.09	9.07	5.06	6.59	6.43	10.24	7.23	2.66	10.76	9.54	10.6	3.15	7.69	8.9	9.86	9.27	12.1	12.86	11.29	21.14	16.53	9.17	20.7	22.28	27.5	10.27	20.02	22.19	14.78	12.96	16.51	25.38	23.8	29.29	12.02	1.05975	9.61155e-12	8.02661e-09
GeneID:107057317	2495	0	0	0.34	0.02	0.06	0.12	0.07	0	0.05	0	0	0.07	0	0	0	0	0	0.15	0.08	0.32	0.22	2.61	2.15	7.44	0.15	0.14	0.76	0.13	1.41	0	1.04	5.82	0	6.77	0.36	5.28575	1.13892e-10	7.08504e-08
novel.9698	3580	0.16	0.21	0.19	0.09	0.1	0.07	0.13	0.06	0.35	0.72	0.5	0	0.25	0.53	0.09	0.19	0.06	0.09	0.27	0.48	0.18	0.29	0.18	0.19	0.49	0.3	0.65	1.18	0.47	0.37	0.24	1.9	0.22	0.58	0.68	1.23155	0.000794068	0.0175896
GeneID:107054134	3498	0	0	0	0	0	0.04	0	0	0	0	0.02	0	0	0.02	0.02	0.1	0	0.13	0	0.24	0.02	0.09	0.09	0.16	0.14	0	0.08	0.17	0	0.11	0.12	0.1	0.09	0.15	0.06	2.27402	0.000605037	0.014575
GeneID:101748132	1230	2.41	4.43	27.18	14.88	0.26	7.48	19.04	4.25	19.47	6.6	1.39	0.4	9.26	3.87	4.49	6.85	2.26	15.98	24.43	4.42	26.95	42.74	9.46	20.5	12.22	126.96	21.4	60.3	32.68	5.94	41.09	45.91	25.33	24.48	50.93	1.76317	1.35036e-06	0.000142146
GeneID:107057481	1182	0	0	0.2	0	0	0.54	0	0	0	0	0	0	0	0	0	0	0	0	0.22	0.1	0	0.24	0.08	0	0.65	0	2.73	0	2.04	1.48	0.28	1.33	0.28	2.97	0	4.01585	0.000131586	0.00486991
GeneID:107049333	739	4.06	0.38	0.22	0.33	0.23	2.44	1.64	0	0.47	0	0.25	0.33	0.45	0	1.75	0.11	0.48	0.56	0	1.29	3.39	15.92	0.13	0.57	2.78	5.23	14.37	7.61	0.1	1.59	3.88	0.7	1.22	11.42	6.9	2.96833	2.04687e-06	0.000196632
GeneID:112531421	1934	0	0	0.05	0	0	0	0	0	0	0.04	0.37	0	0.56	0.27	0.08	0	0.1	0.38	0.08	0.35	0.22	0	1.39	6.93	0	1.15	0.04	0.33	1.42	3.14	0.01	2.44	0.13	4.34	0.3	3.50135	1.79637e-05	0.00111122
GeneID:416806	4161	0.21	0.35	0.08	0.05	0.32	0.35	0.3	0.18	0.41	0.27	0.06	0.07	0.47	0.13	0.13	0.42	0.27	0.13	0.41	0.59	0.52	0.22	0.35	0.64	0.44	0.22	0.6	0.57	0.7	0.73	0.63	1.02	0.72	1.09	0.5	1.21178	4.82362e-07	5.78211e-05
GeneID:107053444	6603	0.06	0.07	0.19	0.13	0.09	0.13	0.14	0.04	0.07	0.14	0.18	0.06	0.12	0.12	0.17	0.04	0.16	0.08	0.18	0.19	0.27	0.16	0.3	0.22	0.41	0.1	0.25	0.35	0.1	0.27	0.17	0.27	0.35	0.23	0.19	1.07245	1.45699e-07	2.1222e-05
GeneID:427247	3049	1.45	4.53	0.66	0.96	2.81	4.94	0.77	1.36	0.57	1.77	3.39	1.13	0.94	0.65	0.83	3.4	7.65	9.52	2.05	13.75	3.14	4.04	8.54	18.04	15.14	0.48	14.53	7.94	4.18	8.23	7.48	7.26	5.08	7.71	1.47	1.44713	7.14387e-05	0.00305419
GeneID:422853	11102	0.15	0.16	0.09	0.07	0.05	0.18	0.05	0.01	0.06	0.18	0.16	0.02	0.15	0.23	0.05	0.19	0.16	0.12	0.04	0.35	0.54	0.17	0.11	0.38	0.28	0.08	0.18	0.54	0.25	0.17	0.36	0.48	0.53	0.34	0.06	1.26503	5.94105e-05	0.00265314
GeneID:776398	1461	15.45	1.06	12.48	17.96	16.22	16.28	9.77	6.95	17.76	10.39	13.99	7.68	10.92	8.88	13.05	15.58	18.73	18.26	14.76	9.25	4.62	2.35	8.38	0.7	0	2.27	3.15	10.98	21.11	17.46	1.09	1.79	4.42	2.54	2.86	-1.04168	0.00280771	0.0420452
GeneID:100859531	1442	2.29	7.17	3.03	7.03	0.06	0.82	8.04	0.27	3.3	5.01	2.6	0.43	8.8	2.99	0.42	7.36	4.53	0.76	20.82	4.79	23.34	13.34	10.41	6.78	7.65	54.82	13.05	18.47	18.12	7.31	8.27	21.52	8.93	29.05	18.48	2.20762	2.60601e-08	5.53292e-06
GeneID:768774	4205	3.43	1.48	1.59	0.02	1.4	0.03	0.29	0.43	0.08	0.75	0.54	1.25	1.14	0.19	0.17	0.83	0.52	1.4	0.06	0.35	0.36	0	1.74	0.71	0.51	0.35	0.02	0.4	0.04	0.73	0.05	1.67	1.41	0.55	0.06	-1.45141	0.000683328	0.0158367
GeneID:422097	3248	0.04	0.09	0.02	0.06	0.02	0.12	0.06	0.06	0.04	0.1	0.09	0	0.06	0.12	0.08	0	0.07	0.1	0.23	0.07	0.16	0.35	0.02	0.08	0.21	0.16	0.06	0.15	0.16	0.06	0.1	0.19	0.16	0.17	0.44	1.30625	0.000139221	0.00508439
GeneID:395612	941	2.12	3.08	3.96	4.87	0.92	0.77	6.97	10.43	5.86	2.72	0.44	0.7	12.53	0.92	1.58	3.58	2.33	1.4	33.3	3.69	21.47	9.19	5.82	14.54	5.18	16.78	8.09	5.75	6.74	3.31	5.35	6.97	4.71	6.63	13.69	1.41532	0.000182558	0.00620572
novel.6945	626	0.22	0.49	0	0.4	0.21	1.59	0	0.29	0.09	0.33	0.23	0	1.11	0	0.19	0	0.2	0.8	2.21	0.57	1.04	0.28	2.4	0.83	2.01	2.76	1.41	0.59	0.39	0.14	0.4	1.67	2.5	0.92	0.75	1.81499	0.000813377	0.0178165
novel.6867	922	0	0	0	0	0	0	0	0	0	0	0	0	0	0	0	0	0	0	0	0	2.96	0	0.21	0.96	0.78	1.24	0	0	0	1.09	0.43	0.21	0.16	0.62	0	4.53126	9.52138e-05	0.00382274
GeneID:100857302	3073	0.77	1.81	11.34	0.37	0.55	0.75	0.23	0.84	0.52	1.25	0.8	1.13	0.41	0.18	0	0.12	0.53	1.89	0.95	2.89	0.96	1.49	56.36	10.02	0.67	0.22	0.67	0.29	1.6	4.73	6.79	22.88	25.03	1.71	0.58	2.55465	0.000106006	0.0041367
GeneID:112532378	10021	0.01	0	0	0	0	0.01	0.01	0.01	0.01	0.03	0.01	0	0	0	0.01	0	0.02	0.01	0.01	0	0.05	0.02	0.03	0.02	0.01	0.01	0.03	0.04	0.01	0.02	0.01	0.03	0.03	0.04	0.03	1.60528	0.00154684	0.0277761
GeneID:112531151	1159	0.97	1.3	0.41	0.71	0.35	2.27	0.19	0.31	1.28	0.97	1.55	1.68	0.33	1.26	1.16	0.52	0.33	2.09	0.47	2.62	4.54	1.85	2.7	8.15	6.77	0.91	0.91	2.93	1.33	11.75	2.47	2.09	2.17	1.42	1.54	1.23976	0.000246057	0.00783288
GeneID:424939	2855	0	0.03	0	0	0	0	0.05	0	0.05	0	0.05	0.02	0.05	0.08	0.02	0	0.03	0	0.02	0.11	0.05	0.11	0.06	0.17	0.22	0	0.12	0.09	0.07	0.04	0.07	0.05	0.02	0.14	0.07	1.9178	0.00028464	0.00859166
novel.13307	258	115.62	225.29	45.44	95.76	335.48	62.83	49.29	78.52	52.44	6.04	47.39	466.8	53.84	0	21.56	17.25	101.57	38.28	55.27	10.65	50.97	6.44	51.26	117.59	25.71	13.76	0	36	28.57	16.8	22.01	58.63	69.01	97.97	51.29	-1.76611	0.000400399	0.010868
novel.4985	2002	0	0	0	0	0	0.1	0	0	0	0.03	0.04	0	0	0	0	0.15	0.62	0.44	0	0.66	0.1	0.08	0.39	0.84	1.84	0	0.45	0.4	0.1	0.2	0.11	0.74	0.14	0.87	0.29	2.4477	0.00122691	0.0237173
GeneID:415761	6325	0.03	0.05	0	0	0.02	0.05	0.01	0.01	0	0.03	0	0	0	0	0	0.02	0.05	0.03	0.01	0.02	0.1	0	0.04	0.06	0.07	0.02	0.07	0.05	0.02	0.03	0.02	0.11	0.06	0.15	0.03	1.49106	0.00317293	0.0453298
GeneID:426437	2915	0.06	0.08	0	0.03	0.03	0	0.03	0.09	0	0	0.03	0	0	0	0	0	0	0	0.03	0.1	0.03	0.05	0.25	0.27	0.34	0.11	0.27	0.03	0.14	0.1	0.25	0.03	0.08	0	0	2.66774	6.56316e-05	0.00284476
GeneID:100859870	885	17.73	22.22	28.33	33.98	15.14	17.56	27.43	19.25	18.26	12.04	25.41	25.74	24.8	26.59	25.11	12.65	17.17	20.72	51.89	41.81	36.93	67.71	63.53	30.76	66.86	26.76	77.83	21	25.38	21.9	67.27	33.47	65.3	64.37	55.96	1.22761	4.3177e-10	2.05711e-07
GeneID:424797	8135	0.07	0.11	0.05	0.02	0	0.02	0.02	0	0.13	0.14	0.03	0.02	0.03	0	0.02	0.04	0.06	0.01	0.44	0.11	0.08	0.12	0.02	0.18	0.1	0.03	0.01	0.28	0.06	0.09	0.18	0.11	0.03	0.11	0.1	1.48325	0.00137456	0.0256608
GeneID:408035	8247	0.02	0.05	0	0	0.01	0.02	0	0	0.02	0.01	0.01	0	0	0	0	0	0.05	0.01	0	0.02	0.04	0	0.24	0.06	0.09	0.01	0.02	0.02	0	0.05	0.05	0.02	0.03	0.07	0.02	2.08535	0.00281347	0.0420759
GeneID:420721	3529	0.08	0.1	0.07	0.07	0.04	0.07	0.12	0.02	0.18	0.11	0.13	0.04	0.02	0.11	0.05	0.06	0.04	0.13	0.08	0.43	0.11	0.06	0.31	0.11	0.17	0.05	0.21	0.09	0.12	0.11	0.22	0.25	0.07	0.38	0.27	1.09146	0.000439159	0.0115207
GeneID:770996	1781	0.09	0.04	0.04	0.04	0.3	0	0.21	0.04	0.04	0.04	0.09	0.12	0.09	0.1	0	0.04	0.27	0.13	0.21	0.42	0.2	0.23	0.05	0.46	0.38	0	0.09	0.27	0.58	0.12	0.29	0.17	0.58	0.63	0.25	1.53022	0.000280527	0.00850653
GeneID:430993	4034	0.96	0.29	0.41	1.53	0.77	0.85	0.65	0.56	0.84	0.89	0.44	0.39	1.84	2.03	1.28	1.74	0.52	0.3	0.25	0.37	0.69	0.16	0.6	0.61	0.13	0.28	0.59	0.48	0.2	0.52	0.36	0.27	0.55	0.49	0.17	-1.28017	1.02782e-06	0.000112485
GeneID:112531519	1959	0.61	0.61	0.64	0.19	0	0.61	0.29	0	0.4	0.27	0	0.11	0.96	0.2	0.8	0.25	0.92	0.48	4.59	0.35	0.73	1.65	0.48	0.24	0.58	0.27	0.23	1.96	0.04	2.75	4	1.22	0.71	0.55	2.07	1.69546	0.000402632	0.010905
GeneID:112531039	2231	0.4	2.83	0.85	0.63	2.09	1.26	3.84	1.4	0.69	1.1	1.31	0.41	1.15	0.67	0.8	3.53	2.85	0.7	0.52	0.5	4.63	3.05	0.53	6	1.65	5.48	2.71	5.62	1.37	1.25	2.71	9	4.75	3	8.97	1.21589	0.000560041	0.013837
GeneID:107049469	824	201.15	83.1	162.56	177.66	280.42	133.53	145.41	199.1	163.13	68.2	107	198.68	160.97	117.1	124.06	51.38	73.52	129.5	45.77	98.71	139.22	36.37	78.85	83.55	49.03	113.31	93.55	87.3	49.86	49.26	53.98	89.37	69.69	51.9	96.04	-1.07327	2.54842e-07	3.4142e-05
GeneID:107054281	11441	0.03	0.01	0.01	0.01	0.01	0.01	0	0.02	0.02	0.02	0.02	0	0	0	0.01	0.08	0	0.06	0	0.01	0.01	0	0.01	0.01	0.01	0	0	0.01	0	0.01	0.01	0	0	0.01	0.01	-2.03764	0.00246558	0.0383666
GeneID:419487	719	0.16	0.82	0	0	2.22	1.59	0.48	1.69	0.65	0.28	0.52	1.83	0	0.18	0.15	1.08	1.66	11.33	1.74	2.28	3.02	3	9.26	9.04	4.95	0	8.74	8.19	4.37	5.03	4.24	3.9	3.72	2.55	3.01	1.59488	0.00221667	0.0358055
GeneID:107054418	6144	0.23	0.08	0.27	0.09	0.79	0.2	0.62	0.03	0.01	0.06	0.02	0.03	0.01	0.04	0.1	0.03	0.08	0.18	0.07	0.04	0.05	0.08	0.14	0.05	0.07	0	0.02	0.11	0.03	0.04	0.02	0.01	0.06	0.01	0.08	-1.54739	0.00163554	0.0286942
GeneID:101748207	1443	0.05	3.89	0.3	0.14	1.23	1.18	0.68	0.49	0.2	1.15	1.43	1.39	0.45	1.69	0.93	1.22	2.59	4.21	1.54	4.52	1.05	2.01	8.63	2.56	8.06	0.53	10.92	10.53	2.39	3.19	13.22	4.59	4.11	10.39	1.87	1.86622	1.7575e-06	0.000176123
GeneID:112530660	2674	0	0	0.03	0	0	0	0	0.03	0	0	0	0	0	0	0	0	0	0	0	0	0.05	0.06	0.03	0	0.1	0.07	0.07	0	0.12	0	0.03	0.11	0.05	0.11	0	2.84149	0.00164577	0.0288131
novel.6201	1368	0.31	1.04	0.75	0.17	0.73	1.06	0.3	0.7	0.36	1.14	0.58	1.15	0.85	0.34	0	0.41	0.81	1.28	0.18	2.24	1.01	0.84	2.41	2.35	1.77	0.28	2.16	1.72	1.79	1.96	1.8	1.14	1.5	1.59	1.3	1.07985	0.000231952	0.00747888
GeneID:101750153	451	0	0	0.46	0.52	0	0	0	0	0.68	0	0	0	0	0	0.5	0	0	0	4.68	0.6	0	0.99	0.37	1.73	0	0.31	0.58	0	1.4	1.55	1.14	0	0	0	2	2.57141	0.00279039	0.0418609
GeneID:770271	7247	0.02	0.03	0.04	0.05	0.04	0.02	0.05	0.06	0.01	0.01	0.05	0.06	0.03	0.01	0.02	0.01	0.06	0.03	0.13	0.13	0.06	0.03	0.13	0.07	0.12	0.08	0.02	0.01	0.06	0.07	0.05	0.05	0.1	0.06	0.02	1.03345	0.00288527	0.0427214
novel.24196	1168	1.43	0.68	2.31	1.07	1.13	3.67	0.86	1.08	1.42	1.6	1.19	0.21	0.75	0.91	1.25	2.33	3.12	4.44	1.17	5.37	11.58	6.87	1.8	3.75	0.15	0.69	1.34	2.74	4.52	5.81	8.23	3	4.86	4.93	2.67	1.27	0.000242882	0.00774164
novel.7526	3526	0.32	1.92	0.79	0.11	1.76	2.38	0.31	1.46	0.33	0.8	0.78	0.32	1.51	0.81	0.26	0.48	2.33	2.29	0.33	3.45	1.92	1.06	1.05	4.84	3.2	0.27	4.37	1.76	2.72	2.18	2.28	2.36	2.64	4.42	1.71	1.08786	0.00148225	0.027086
GeneID:427906	9345	0.01	0.03	0.04	0.15	0.01	0.07	0.02	0.01	0.02	0.04	0.04	0.01	0.05	0.05	0.07	0.06	0	0.01	0.05	0.02	0.19	0.05	0.07	0.12	0.1	0.1	0.12	0.14	0.12	0.02	0.12	0.09	0.09	0.13	0.07	1.21957	0.000308411	0.00907946
novel.2002	1869	0.17	0.33	0.04	0.27	0.33	0.26	0.28	0.16	0.16	0.29	0.26	0.15	0.12	0.18	0.19	0.28	0.17	0.39	0.08	0.27	0.27	0.13	0.09	0	0.04	0.15	0.12	0	0.04	0.15	0.12	0.08	0.08	0.12	0	-1.23859	0.000258978	0.00805985
novel.23472	1053	1.04	0.09	0.51	0.34	0.26	0.47	0.52	0.16	0.26	0.15	0.17	0.08	0.17	0.38	0.56	0.76	1.05	0.58	1.19	0.85	0.57	1.78	0.4	1.7	0.2	1.28	1.65	2.56	1.19	1.09	1.03	0.09	1.16	3.07	1.83	1.61315	4.66429e-06	0.000381878
GeneID:395840	478	1.78	5.08	11.94	16.17	5.08	3.3	6	3.81	6.05	7.18	0	1.43	33.43	0	72.54	26.24	3.43	0	189.14	692.27	284.66	570.86	5.31	6.94	5.66	30.04	2.26	0.39	7.34	239.22	5.31	5.55	3.79	3.62	696.12	3.82204	2.07829e-06	0.00019873
novel.5473	664	7.38	9.25	19.66	19.13	19.5	18.48	9.65	18.84	18.07	4.95	21.31	34.65	11.47	8.96	31.14	4.9	15.04	19.02	14.52	35.31	40.59	23.74	35.93	45.79	16.65	39.3	26.75	90.72	24.2	37.78	16.04	9.42	13.72	36.98	10.53	1.15814	0.000327632	0.00946733
GeneID:107049368	296	17.95	6.23	0.39	0.15	0.35	3.87	0.37	0.32	0.19	35.47	0.08	0.36	0.29	10.02	12.79	8.91	0.24	0.1	24.33	11.7	1.38	4.88	0.26	2.82	2.01	0.93	1.47	5.35	0.36	8.09	4.16	0.12	6.04	0.44	44.29	1.99764	5.82609e-07	6.86985e-05
GeneID:107051353	2993	0.08	0	0.66	0.03	0.31	0.06	0.24	0.15	0.35	0.02	4.28	0	0	0	0.07	0.23	0.02	0.74	0.09	0.06	0.05	2.22	0.92	2.53	0.23	0.05	0.75	0.19	1.72	0.16	1.15	5.67	0.07	3.68	0.63	2.62094	0.000522976	0.0131152
GeneID:112533208	1109	0.08	0	0	0	0	0.07	0	0	0	0	0	0	0	0.09	0	0	0.08	0	0.16	0	0.08	0.17	0	0.08	0.24	0	0.08	0.21	0.22	0	0.08	0.08	0.08	0.39	0.24	2.3509	0.00125925	0.0241008
GeneID:107053777	3614	0	0.04	0.05	0	0.06	0.02	0	0.04	0	0.05	0.04	0	0	0.04	0.02	0	0	0.04	0.11	0	0.05	0.08	0.22	0.04	0.02	0.07	0.06	0.02	0.05	0.05	0.04	0.04	0.09	0.09	0.06	1.45938	0.00337712	0.047273
GeneID:107052464	6360	0.03	0.1	0.11	0.2	0.03	0.1	0.01	0.04	0.01	0.13	0.06	0.07	0.2	0.06	0.13	0.11	0.04	0.07	0.07	0	0.03	0.01	0	0.02	0	0.04	0.02	0.02	0	0.02	0.05	0.01	0.04	0.02	0.01	-2.04067	1.21538e-06	0.000130682
GeneID:396490	1259	112.73	147.25	53.12	149.25	274	135.32	465.62	596.12	341.28	145.59	151.81	420.76	71.86	204.04	230.04	89.75	136.14	164.96	160.96	99.94	95.27	51.29	200.49	117.14	98.55	80.55	99.38	104.86	75.33	53.93	86.56	143.25	113.74	156.46	78.34	-1.18889	8.27965e-06	0.00060652
novel.4185	7599	0.04	0	0.06	0.02	0	0.04	0	0.03	0.02	0.04	0	0	0.02	0	0	0	0.07	0	5.06	6.32	4.89	4.07	0.1	5.13	0.02	0.05	3.83	6.12	0.01	3.53	3.7	6.51	4.78	6.42	0.06	5.35305	3.46836e-19	1.24133e-15
GeneID:424238	6903	0.05	0.43	0.19	0.4	0.14	0.1	0.21	0.08	0.15	0.34	0.17	0.15	0.07	0.17	1.45	0.2	0.19	0.09	0.29	0.04	0.05	0.22	0.09	0.07	0.07	0.11	0.15	0.27	0.07	0.15	0.1	0.11	0.04	0.15	0.12	-1.12777	0.00189594	0.0320628
GeneID:107052434	583	0.72	24.85	1.19	2.85	0.18	1.42	10.74	0	4.76	1.37	15.11	1.3	0.59	3.43	5.74	2.57	0.67	6.69	1.01	0.75	0.11	1.68	0.6	1.22	0.99	0.43	4.51	0.79	0.56	1.5	4.57	0.41	0.06	0.25	1.46	-1.48989	0.000382264	0.0105489
GeneID:430746	3453	0.38	0.92	0.46	0.15	1.3	1.38	0.56	0.19	0.24	0.72	0.6	0.22	0.82	0.7	0.49	0.88	1.36	1.16	1.04	0.54	2.9	2.79	0.62	0.34	5.67	0.31	7.68	2.32	3.76	1.69	2.8	1.54	0.65	1.97	1.33	1.62609	3.08949e-06	0.000275449
GeneID:112531381	1498	0	0	0	0	0	0	0	0	0	0	0.07	0	0	0	0	0	0	0	0.05	0.31	0	0	0.11	0.63	0	0	0.03	0	0.67	0.07	0	0.65	0	0.91	0.11	4.05863	0.000699175	0.0160407
GeneID:107055027	2895	0.23	0.22	0.19	0	3.29	0.28	0.49	3.66	0.13	0.12	0.19	3.78	0.62	0.23	0.23	0.09	0	0.31	0	0.32	0	0.18	0.65	0.12	0.16	0.26	0.32	0	0.08	0.23	0	0.14	0.26	0	0	-2.66165	0.000225636	0.00734138
novel.18991	359	6.54	5.75	6.04	0	8.49	5.94	0	1.18	0	0	0	2.45	1.3	17.47	2.41	1.13	0	1.14	18.67	4.09	12.17	7.91	2.76	42.61	68.02	21.89	10.01	55.94	4.06	4.46	13.17	3.01	5.18	71.15	70.47	2.62745	4.89938e-06	0.00039723
GeneID:101751260	4074	0.42	0.61	0.18	0.15	0.27	0.07	0.23	1.2	1.32	0.78	0.33	0.03	0.1	0.87	0.45	0.15	0.02	1.9	0.18	0.69	2.66	0.17	0.77	1.91	0.64	0.22	2.7	0.37	0.63	0.53	1.87	0.99	4.52	4.14	1.08	1.40022	0.00216803	0.0352698
novel.11799	1616	0.35	0.44	0.43	0.05	0	1.26	2.07	0.24	1.12	0.39	0	0.32	0.24	1.05	0.05	0.29	0	0.05	0.1	0	0	0	0	0	0	0	0	0	0	0.04	0	0.05	0.05	0	0.05	-4.7923	8.85266e-10	3.54186e-07
GeneID:417020	2924	21.03	4.83	21.42	1.61	12.78	6.92	5.23	51.7	12.12	12.98	5.35	6.13	10.04	8.83	27.75	11.87	12.25	2.49	2.02	3.93	6.38	4.15	4.99	3.41	3.8	0.1	2.88	13.92	1.3	3.28	3.91	10.12	5.76	3.77	11.63	-1.50313	6.13093e-05	0.00270419
GeneID:423824	8062	0.07	0.07	0.02	0.05	0.06	0.09	0.06	0.08	0.06	0.15	0.07	0.01	0.1	0.11	0.08	0.03	0.12	0.05	0.05	0.53	0.08	0.23	0.13	0.21	0.26	0.02	0.24	0.16	0.12	0.04	0.17	0.12	0.4	0.04	0.06	1.16789	0.000385074	0.010555
GeneID:100857191	1728	1497.41	756.47	1173.42	2291.34	1461.14	794.19	2012.76	1582.97	992.27	1150.38	1932.94	2179.93	1090.86	2147.32	2251.23	1124.38	573.95	829.61	1444.29	453.89	716.9	1511.71	484.05	632.89	609.18	1052.22	830	208.57	853.66	608.39	628.19	367.51	716.73	478.64	1379.54	-1.01694	1.81399e-05	0.00111756
GeneID:424381	1761	0.36	0.44	0.85	0.63	0.79	1.14	0.82	1.4	0.79	0.47	0.23	0.79	0.26	0.4	1.31	0.81	0.59	2.76	0.47	1.87	0.41	0.47	4.25	1.23	2.15	2.79	7.13	2.84	0.47	1.86	1.3	4.42	2.59	0.55	0.47	1.2171	0.00072649	0.0164026
novel.11802	1943	0.12	0.78	0.38	0	0	1.66	0.65	0	0.93	0.49	0	0.07	0.7	0.84	0.07	0.49	0.2	0.15	0	0	0.04	0.04	0	0	0.11	0	0	0	0	0	0.04	0	0.04	0.04	0	-4.58154	4.21519e-09	1.33675e-06
GeneID:424324	2428	1.21	2.34	1.58	1.62	3.58	2.1	2.56	3.41	3.14	1.55	2.35	2.99	1.41	2.43	1.9	0.95	2.36	1.68	0.56	0.89	1.25	0.58	1.5	1.49	0.86	0.82	1.3	1.89	0.81	0.57	0.95	1.3	1.27	1.05	1.58	-1.12062	9.58132e-10	3.75064e-07
GeneID:396000	4597	90.75	68.36	181.09	134.5	81.61	46.04	189.44	120.58	272.12	84.46	93.15	47.39	81.06	130.71	163.94	76.54	66.52	66.33	30.39	50.28	80.16	34.83	56.54	42.22	60.11	105.43	50.05	55.05	49.81	48.15	55.39	56.65	70.18	46.45	98.3	-1.00811	7.29504e-07	8.38361e-05
novel.6019	6532	1.07	0.19	0.52	0.54	0.26	0.63	1.03	0.48	0.76	0.25	0.9	0.5	0.48	0.52	0.71	0.67	0.24	0.77	0.52	0.16	0.27	0.09	0.28	0.14	0.52	0.62	0.36	0.16	0.1	0.37	0.17	0.49	0.11	0.29	0.32	-1.07823	4.64713e-05	0.00219669
GeneID:396427	3073	4.63	7.5	8.71	8.61	2.63	5.34	12.4	11.54	21.46	9.79	4.54	1.49	15.37	6.59	6.95	6.13	6.13	5.77	24.48	6.22	29.03	26.47	9.07	11.9	7.72	22.83	16.51	19.15	19.14	10.73	20.13	23.91	10.55	13.12	23.31	1.04395	1.85681e-05	0.00113976
GeneID:423884	9877	0.13	0.2	0.02	0.12	0.05	1.21	0.04	0.03	0.03	0.16	0.32	0.08	0.09	0.18	0.07	0.17	0.41	0.77	0.14	0.49	0.27	0.45	0.8	1	0.82	0.04	0.44	0.7	0.35	0.5	0.41	0.44	1.37	1.45	0.24	1.31763	0.00167642	0.0291663
novel.256	1066	0	0	0.3	0.08	0	0.08	0.92	0.16	0.77	0	0.18	0	0.51	0.38	1.34	0	0.09	0	0.17	0	0	0.09	0	0.08	0	0	0.08	0.08	0.08	0	0	0.17	0	0	0.08	-2.54193	0.00223059	0.0358914
GeneID:101748004	1124	0.4	0.64	0.14	0	0	0.29	0.08	0	0.08	0.28	0.34	0.07	0.08	0.18	0.15	0.08	0.15	0.23	0	0.51	1.06	0.69	2.05	0.62	0.31	0.07	0.25	0.96	0.28	0.07	0.15	1	0.15	1.44	0.15	1.86867	0.000234622	0.00753589
GeneID:776874	926	0.67	0	1.2	1.77	0.42	4.72	0	0.65	0.15	0	0.16	0	0.46	0.17	0.26	0.15	14.95	0.12	0.3	0.17	0.65	0.95	7.18	0.9	0	0	0.61	0.23	7.12	0.41	1.04	1.27	0.05	1.35	6.14	2.07279	0.00124256	0.0239068
novel.12619	4565	4.54	3.97	3.56	6.7	1.18	2.77	2.41	1.29	2.25	5.65	4.19	1.91	3.37	4.29	2.37	6	3.59	2.4	1.64	0.97	1.64	2.03	2	1.49	1.3	1.5	1.3	1.48	1.87	1.79	1.55	1.18	1.52	1.16	2.23	-1.1964	1.47278e-12	1.67716e-09
novel.22524	1605	0	0.45	0.52	0.56	0.05	0.05	0.49	0.14	0.88	0.35	0.11	0	0.25	1	0.78	0.14	0.56	0.48	0.39	1.18	0.73	0.42	0.84	2	2.17	0.59	1.71	1.18	0.75	0.58	0.38	0.05	1.27	2.39	0.14	1.31157	0.00148585	0.0271083
GeneID:107055411	1061	0	0.78	0.91	0.24	0.43	0.31	0.17	0.5	0.26	0.38	0.37	0.08	0.34	0.38	0	0.08	0.53	0.33	0.08	0	0.08	0	0.1	0.67	0.08	0.24	0	0.08	0.23	0.08	0.17	0	0.25	0	0.08	-1.50409	0.00240026	0.03782
GeneID:101751049	894	0	0	0	0	0	0	0	0	0	0	0	0	0	0	0	0	0	0	0.55	0.73	0	0.71	0.5	0	0	0	0.78	2.08	0.89	0.3	0	1.22	0.32	0.11	0	4.46658	3.45962e-05	0.00178341
GeneID:107050315	393	6.11	6.75	2.04	0	2.1	5.89	3.61	1.48	1.24	0.94	1.32	5.9	1.65	2.34	0.16	0.51	3.87	3.87	9.01	1.94	0	3.52	2.95	6.66	11.81	5.76	4.24	16.44	2.93	1.17	4.98	22.83	1.22	24.6	17.35	1.33181	0.000253987	0.00797385
novel.4419	3308	0	0	0	0	0	0	0	0	0	0	0	0	0	0	0	0	0	0	0	0	0.63	0	0	0	0	0.08	0.77	0.99	0	0	0	1.27	0	1.77	0.45	6.39498	0.000898909	0.019085
GeneID:107057476	1426	0	0	0	0	0	0.31	0	0	0	0.08	0	0	0	0	0	0	0	0	0.3	0.23	0	0.44	0	0	0.56	0	1.18	0	1.55	0.95	0.2	0.46	0	1.58	0	4.33325	0.000125922	0.00470856
GeneID:417972	3707	5.48	1.72	9.9	13.77	0.02	1.09	7.65	2.12	5.63	12.22	5.99	3.99	11.04	8.92	5.92	3.51	0.9	1.21	3.92	1.48	2.67	2.41	2.38	0.79	0.67	9.36	1.57	0.4	0.35	3.49	1.53	0.31	0.26	0.15	1.94	-1.56825	0.00162847	0.0286302
GeneID:107052781	2684	0.08	0.08	0.38	0.05	0	0.02	0.05	0.05	0.05	0.07	0.03	0.1	0.27	0.06	0.1	0.03	0.05	0.05	0.21	0.52	0.35	0.72	0.3	0.49	0.13	0.02	0.34	0.14	0.31	0.75	0.51	0.21	0.1	0.15	0.26	1.83149	2.87356e-06	0.000262742
GeneID:112532619	1668	26.86	90.86	33.7	23.1	14.4	67.65	11.65	0.71	20.74	15.21	18.57	10.85	27.39	41.15	9.35	44.29	84.57	130.72	38.08	80.16	86.93	75.38	122.86	58.65	115.81	24.05	110.33	136.37	119.45	49.46	88.91	84.69	120.18	176.64	37.31	1.30312	7.40459e-05	0.00312828
GeneID:395468	772	27.2	5.09	17.68	113.37	11.08	4.45	131.88	51.57	80.54	26.18	6.31	27.92	11.86	11.28	38.91	9.23	6.77	7.76	45.54	2.08	7.15	5.72	7.47	1.79	1.28	271.66	15.49	2.18	7.14	5.98	7.77	3.02	7.87	4.11	7.23	-2.04443	5.6633e-06	0.000444773
GeneID:100857858	1376	447.93	398.28	259.28	133.71	568.29	314.78	316.04	576	300.5	271.98	435.66	992.58	385.09	210.62	288.44	417.9	324.85	290.62	491.57	89.69	129.23	221.59	293.45	75.03	45.46	95.72	98.8	230.18	71.86	554.96	83.99	293.52	98.02	259.45	119.4	-1.13936	0.000131765	0.00486991
novel.11234	764	0.15	0.29	0.38	0.14	0	0.65	0	0	0.15	0	0	0	0.72	0	0	0.56	0.15	0.41	0	0.94	0.41	0.3	1.79	1.7	0.83	0.27	0.87	1.54	0.13	0.39	0.56	0.44	0.55	1.99	0.57	1.85917	0.000287905	0.00867976
GeneID:417883	1454	0.06	0.06	0	0.11	0	0.11	0.06	0.05	0.29	0.15	0.12	0	0	0	0	0	0.29	0.22	0.38	0.24	0.16	0.02	0.13	0.38	0.34	0.36	0.17	0.55	0.15	0.05	0	0.79	0.28	0.11	0.38	1.68608	0.000839817	0.0182322
novel.22177	1318	0	1.89	0	0	0	0.01	0.65	0	0.43	0	0.18	0	0.11	0.16	0.22	0	0	0	4.13	3.13	1.71	2.47	3.43	3.56	4.94	2.12	3.6	0.61	4.67	2.3	4.84	4.99	1.02	1.27	5.31	4.04267	2.52005e-12	2.745e-09
GeneID:415818	5200	3.88	7.09	4.86	13.51	7.35	5.73	27.71	8.66	17.43	7.59	6.88	5.14	3.74	11.23	17.44	4.54	8.59	11.79	5.68	5.18	4.12	8.37	2.89	3.91	7.26	4.58	2.84	4.68	4.54	3.15	3.85	5.31	4.64	3.93	8.8	-1.05248	4.62838e-06	0.00038018
GeneID:101749515	3260	0	0	0	0	0	0.02	0	0	0	0	0	0	0.02	0	0	0	0.02	0.08	0.04	0.02	1.33	0.05	0.61	0.08	0.02	0.43	0	0.8	0.04	0.1	0.04	0.32	0	0.12	0.31	4.82508	8.90201e-09	2.25275e-06
GeneID:107053429	3391	0.71	0.54	0.42	0.25	0.25	0.27	0.49	0.06	0.16	0.34	0.3	0.23	0.29	0.54	0.42	0.32	0.45	0.58	0.08	0.13	0.23	0.07	0.09	0.16	0.2	0.02	0.19	0.18	0.15	0.15	0.31	0.15	0.21	0.16	0.16	-1.31013	1.91186e-08	4.23874e-06
GeneID:112531299	1549	0	0	0.05	0	0.26	0	0.05	0	0.1	0.09	0	0	0.05	0	0.05	0	0	0.05	0	0	1.03	0.05	0.89	0.1	0.06	0.21	0.1	0.23	0.16	0	0	0.37	0.6	0.05	0	2.54311	0.00351206	0.0486292
novel.17730	6772	0.96	1.1	0.16	0.21	0.71	0.8	0.62	1.11	0.46	1.52	0.48	0.39	0.42	1.33	0.2	0.17	1.85	0.75	0.36	0.36	0.19	0.52	0.29	0.33	0.4	0.08	0.06	0.15	0.24	0.25	0.19	0.09	0.09	0.07	0.21	-1.77625	2.59087e-08	5.53292e-06
GeneID:101748375	1334	0.8	0.48	0.93	0.37	0.13	0.9	0	1.92	0.49	0.19	1.19	1.37	1.04	0.3	0.39	0.93	0.52	0.23	0.9	3	0.05	10.35	28.17	5.75	9.45	28.74	9.22	26	7.13	11	9.04	2.49	6.26	2.49	4.17	4.00065	3.10826e-19	1.24133e-15
GeneID:428729	5835	0.27	0.61	0.45	0.47	1.2	1.17	0.51	0.16	0.33	0.29	0.48	0.31	0.26	0.32	0.21	0.32	1.49	2.19	0.47	1.37	0.23	1.33	0.73	3.72	2.96	0.48	2.97	0.63	1.03	2.43	2.29	0.44	1.72	1.35	0.26	1.15025	0.00103806	0.0211608
GeneID:427725	1121	2.32	3.06	4.11	4.94	0.27	2.85	15.84	1.77	12.3	4.97	1.04	0.14	8.71	2.66	1.36	6.08	0.85	0.91	14.11	2.25	18.43	8.92	12.82	6.88	4.4	31.62	10.11	18.46	12.75	6.3	10.59	14.3	7.34	10.02	40.14	1.70061	2.66569e-05	0.00146777
novel.21150	7190	0.07	0.18	0.01	0.02	0.03	0.07	0.05	0.03	0.04	0.03	0.09	0.02	0.03	0.04	0.04	0.04	0.08	0.16	0.17	0.18	0.08	0.23	0.08	0.38	0.24	0.06	0.1	0.09	0.12	0.07	0.13	0.05	0.2	0.19	0.11	1.32334	1.99131e-05	0.00117921
GeneID:420947	4082	0.04	0.24	0.16	0.27	0.05	0.16	0.41	0.32	1.2	0.29	0.04	0.13	0.59	0.27	0.2	0.33	0.19	0.11	1.47	0.24	1.3	0.77	0.44	0.52	0.25	0.63	0.98	0.82	0.55	0.58	1.05	0.69	0.8	0.31	0.65	1.28743	5.84192e-05	0.00263233
novel.8857	825	3.92	4.27	1.27	0.13	0.72	16.25	2.63	0.13	2.15	8.49	4.73	1.39	0.67	3.23	0.86	1.98	9.08	3.56	0.39	0.44	1.24	0.42	0	0	0	0.11	0	1.18	0.71	0	0.78	0	1.39	3.44	0	-2.65903	9.63718e-06	0.000678203
GeneID:101750070	1026	0	0.5	0.15	0	0	0.62	0.85	0.69	1.31	0.4	0	0.6	1.03	0.3	0.29	0.12	0.39	0.36	3.57	1.37	0.86	1.92	0.6	0.18	0.96	1.18	0	1.16	0.95	1.07	0.1	1.52	1.03	1.64	1.87	1.45149	0.00207432	0.0343249
GeneID:427879	2958	0	0.05	0	0	0	0.07	0.05	0.09	0.07	0.04	0.03	0	0.12	0.05	0.04	0	0	0.12	0.07	0.26	0.11	0.1	0.14	0.07	0.08	0.13	0.05	0.19	0	0.19	0.18	0.04	0.11	0.05	0.12	1.5134	0.00133043	0.0250799
GeneID:112530026	2283	0.17	0.12	0.07	0.09	0.15	0.13	0	0.11	0	0	0.35	0.4	0.01	0.14	0.01	0.45	0.43	0.35	0.2	0.34	0.48	0	0.8	0.43	0.66	0.38	0.18	0.23	0.1	0.45	0.12	1.07	0.57	0.26	0.74	1.38361	0.0022243	0.0358411
GeneID:112532662	1225	0.53	2.92	3.71	3.17	0	0.77	1.23	0.88	2.34	0.89	0.74	0	1.55	0	1.04	0.73	0.39	0.96	0	0.14	0.03	1.02	0.68	0.14	0.28	0	0.43	0.6	0.26	0.26	0	0	0	0.25	0	-2.31183	0.000173954	0.00596995
GeneID:415651	2667	17.53	12.51	45.62	97.8	19	8.45	70.01	36.01	65.91	40.46	19.13	17.61	26.46	30.9	61.79	16.56	17.37	12.88	46.22	6.88	11.05	15.27	8.54	9.23	8.4	47.11	13.81	6.41	10.83	7.16	14.62	15.58	13.67	9.28	15.88	-1.14148	0.000278291	0.00846773
GeneID:112531491	2552	0	0.12	0.06	0	0	0.14	0	0	0.06	0.03	0.02	0	0	0.03	0.03	0	0	0.04	0	0.07	0	0.1	0.2	0.06	0.15	0.03	0.11	0.11	0.23	0.23	0.14	0.15	0	0.15	0.19	1.91668	0.000808904	0.0177688
GeneID:771428	12218	0	0.1	0.03	0.04	0.04	0.03	0.03	0.16	0.03	0.08	0	0.05	0.01	0.04	0.07	0.03	0.01	0.04	0.7	0.05	0.03	0.22	0.07	0.32	0.11	0.02	0.12	0.05	0.14	0.03	0.26	0.07	0.14	0.06	0.02	1.17057	0.00178432	0.0305136
novel.7618	3489	1.24	0.73	0.82	0.47	0.21	1.33	0.11	0.74	0.15	0.58	0.56	0.47	0.08	0.26	0.36	1.24	1.26	0.62	1.15	1.52	2.08	0.87	1.44	1.42	1.13	0.73	1.66	1.24	1.24	1.6	0.98	0.93	1.78	1.19	0.7	1.27609	1.9921e-05	0.00117921
GeneID:112531452	1672	0	0	0	0.26	0	0.17	0	0.07	0	0	0.04	0	0	0	0	0	0	0.37	0	0.07	0	1.67	0.64	2.23	0	0.06	0.8	0	2.06	0	0.15	2.98	0	2.66	0.33	3.65047	0.000190343	0.00642677
GeneID:112533583	1718	0.39	0.19	2.27	0.35	0.21	0.08	0	0.04	0.2	0.45	0.28	0.04	0.4	0.14	0.19	0	0.08	1.15	0.58	0.4	0.72	2.58	0.45	1.24	0.29	1.54	0.74	0.64	0.5	0.41	1.3	0.14	0.49	1.07	0.83	1.50401	0.000513578	0.0129313
novel.15692	752	0	3.02	0	0	2.62	4.43	0.4	2.06	1.54	0	1.2	3.34	5.65	3	0.44	0.77	3.35	0.7	21.62	19.55	0	15.17	6.84	19.11	15.03	5.08	14.54	6.08	0	0.22	13.32	2.91	2.29	11.82	0	2.23098	0.0006509	0.0153117
GeneID:419400	5105	0.03	0.05	0.04	0.15	0.04	0.07	0.03	0.03	0.01	0.1	0.03	0	0	0.03	0.1	0.01	0.05	0.04	0.14	0.07	0.04	0.09	0.26	0.41	0.09	0.14	0.09	0.17	0.02	0.07	0.08	0.09	0.26	0.04	0.05	1.39381	0.000476331	0.0122395
novel.18662	524	4.26	2.94	7.94	2.41	0.93	2.21	1.26	0	0.33	1.62	1.39	0	3.88	0	0	7.26	1.33	0.9	0.31	0	0.91	0.32	0.36	0.97	0	0.9	0	1.15	0	0.57	0.32	0.67	0.31	0	0.64	-2.3751	5.25932e-05	0.00243552
GeneID:425470	2022	0	0.04	0.03	0.14	0	0.03	0.07	0.07	0.07	0.1	0	0.07	0.11	0	0.24	0.04	0	0	0	0	0	0	0	0	0	0	0	0.03	0	0	0	0	0	0	0	-3.05464	0.000529507	0.0132393
novel.7764	3078	0.16	0.07	0.39	0.02	0.07	0.15	0.25	0.22	0.05	0.02	0.07	0	0.32	0.18	0.04	0.11	0.09	0.27	0.31	0.25	0.45	1.03	0.31	0.42	0.76	0.17	0.34	0.69	0.6	0.37	0.37	0.52	0.04	0.29	0.54	1.59833	3.50168e-06	0.000303556
GeneID:770209	984	29.62	18.02	70.69	34.5	39.12	21.81	90.38	204.12	45.78	20.06	16.97	28.7	27.05	71.86	100.53	27.78	22.74	23.1	24.8	12.75	9.04	60.09	20.55	10.3	15.83	53.76	6.69	14.67	12.45	8	13.59	18.57	9.27	9.95	25.85	-1.48002	1.88283e-05	0.00114347
GeneID:112531459	837	0.08	0	0.45	0.33	0.08	0.58	0	0.15	0	0.18	0	0	0.04	0.34	0.27	0.15	0	1.33	0.26	2.18	0.02	3.08	0.15	13.35	0.15	0.05	3.72	0.4	1.55	0.03	5.01	18.72	0	18.03	3.23	3.61837	2.90574e-07	3.77189e-05
GeneID:396522	1251	8.55	6.19	3.15	12.32	12.19	5	24.26	24.68	19.81	11.14	10.95	26.03	5.82	5.02	10.76	7.36	5.55	6.81	13.74	5.11	5.72	2.18	9.42	7.6	8.99	7.36	7.7	4.35	6.58	2.05	6.8	3.14	4.28	5.59	2.47	-1.04799	0.000211465	0.0069981
GeneID:423053	3304	0.04	0.06	0.06	0.08	0	0.14	0.15	0.1	0.08	0.06	0.04	0.04	0.06	0.1	0.13	0.06	0.12	0.06	0.34	0.23	0.13	0.1	0.19	0.52	0.18	0.12	0.11	0.24	0.1	0.07	0.05	0.12	0.07	0.19	0.06	1.02365	0.000893287	0.0189979
GeneID:396426	1390	0.12	0.06	0.05	0	0	0	0	0	0.18	0.05	0.06	0	0.12	0.07	0	0.23	0.12	0.23	0.17	0.13	0.33	0.44	0.61	0.11	0	0.11	0.35	0.37	0.11	0.21	0.34	0.18	0.4	0.06	0	1.63359	0.00144378	0.026587
novel.20178	1636	0.42	0.83	0.93	0.49	0.15	0.49	0.61	0.17	0.4	0.31	0.49	0.06	0.45	0.62	0.26	1.09	0.45	0.63	0.8	0.98	1.4	1.95	2.59	0.52	0.95	0.66	0.19	1.16	0.99	0.69	0.86	0.9	2.89	1.77	1.66	1.31389	3.9283e-06	0.00033704
GeneID:107052009	5163	0.42	0.38	0.15	0.09	0.21	1.03	0.23	0.11	0.45	0.45	0.82	0.07	0.21	0.42	0.28	0.59	0.96	1.09	0.28	1.01	1.17	0.79	1.02	1.93	1.44	0.08	0.96	1.6	0.66	0.63	1.08	0.77	1.27	1.23	0.9	1.1149	0.000183574	0.00623182
GeneID:107050509	1079	10.69	7.43	7.31	10.45	14.84	22.42	11.96	2.23	5.76	9.88	10.82	3.88	6.65	16.28	13.89	10.67	18.14	22.2	17.92	24.85	49.39	13.1	7.57	36.98	63.54	30.38	44.89	17.44	12.47	30.29	29.84	11.57	12.36	35.95	31.04	1.25396	2.82312e-05	0.00152102
GeneID:418107	1293	23.08	27.98	30.74	59.09	69.52	34.14	128.32	81.98	50.64	37.09	41.27	33.02	21.9	34.6	68.75	31.87	31.16	34.14	24.01	16.53	11.36	15.54	32.97	16.71	13.12	24.77	16.83	14.95	29.41	8.87	12.67	16.83	25.31	18.5	42.06	-1.34047	8.26794e-09	2.13678e-06
GeneID:107049909	3564	0.51	1.2	8.4	1.27	0.35	1.64	1.1	0.71	1.64	1.07	1.74	1.1	1.05	1.03	0.63	0.39	1.73	3.49	1.4	11.59	1.45	8.17	0.85	3.02	1.95	1.5	1.09	2.14	9.55	6.01	7.18	1.61	5.67	5.53	9.62	1.35113	7.91648e-05	0.00328111
GeneID:112530980	1983	0.4	0.27	0.43	0	0.01	0.07	0	0	0.26	0	0.11	0.08	0	0.46	0.23	0	0.1	0.22	0.06	0	0	0	0	0	0.2	0	0	0	0.03	0	0	0	0	0	0	-3.27744	0.00111536	0.0221948
GeneID:112531337	1160	0	0	0	0	0	0.34	0.18	0	0	0	0.1	0	0.12	0.34	0.28	0	0	0	0.15	1.01	0.67	0	0	0	1.03	0.52	0.34	2.12	0.49	0	0	2.98	0.17	2.53	2.52	3.64377	1.75967e-05	0.00109726
GeneID:107049387	1115	0.67	0.2	0.99	0.54	0.09	0.58	1.62	0.35	0.31	0.3	0.1	0	0.09	0.65	0.28	0	0.5	0.32	8.42	0	0.37	0	0.42	142.78	0	1.17	0.1	78.62	0.6	0	0.3	1.64	7.48	2.99	0.94	2.42978	0.000628215	0.0149465
GeneID:112531416	756	0.07	0.04	0.03	0	0	0	0	0	0	0	0.28	0.07	0	0.16	0	0	0.03	0	0.2	0.19	0	0	0.57	0.58	0	0.07	0.13	0.31	0.84	0.39	0	0.48	0	3.84	0.17	3.16779	0.000393797	0.0107471
GeneID:395093	7192	2.48	2.94	1.51	1.38	3.7	5.44	1.53	0.86	1.86	1.81	2.59	1.08	1.15	1.7	1.23	3.56	3.57	2.41	1.34	4.48	5.3	1.62	5.35	4	6.24	4.09	5.84	5.65	3.43	4.15	4.52	8.81	6.17	7.91	4.78	1.06052	1.91624e-07	2.66708e-05
GeneID:395096	1689	1.5	0.73	3.32	33.74	0.96	0.34	24.87	8.92	8.59	1.45	1.45	2.49	3.05	2.31	49.32	1.15	0.2	1.53	42.55	0.64	0.53	3.29	1.18	0.06	0.17	45.66	0.95	0.1	1.26	0.61	1.61	0.17	0.13	0.06	4.57	-3.01888	1.98788e-06	0.000193033
novel.10816	3254	0.05	0.14	0	0.39	0.72	0	0.2	0	0	0.12	0.17	0	0.38	0	0.2	0.08	0.33	0	1.21	1.35	0.11	0.98	2.16	0.87	0.7	0	0.28	0.3	0.71	0.18	0.74	1.72	1.9	2.56	0.16	2.50472	4.2566e-05	0.0020587
novel.23307	387	4.43	20.73	6.75	1.14	0	7.28	1.78	0.63	9.35	18	0.48	2.58	15.02	0	0	12.64	0	4.88	22.03	18.02	1.61	14.01	0.5	31.06	10.12	11.17	29.32	0.6	11.45	21.79	19.84	2.53	15.37	20.05	0.92	1.61089	0.00317034	0.0453298
GeneID:422924	1332	0.08	0.31	0.13	0.02	0.02	0.28	0.11	0.03	0.07	0.12	0.18	0.05	0.05	2.5	0.02	0.28	0.38	0.02	0.48	17.02	0.35	0.97	5.85	3.62	3.27	0.59	1.13	8.73	2.31	3.35	1.05	0.52	1.37	6.59	2.91	3.02055	8.3828e-18	2.33349e-14
GeneID:100858777	3468	0.45	0.65	0.43	0.11	0.02	0.26	0.36	0.29	0.14	0.33	0.71	0.19	0.3	0.21	0.43	0.74	0.12	0.31	0.33	0.04	0.11	0.13	0.27	0.21	0.16	0.11	0.18	0.21	0.13	0.14	0.1	0.06	0.11	0.14	0.33	-1.10045	0.000160594	0.00563494
novel.19969	810	0.13	0.79	0.23	0.74	0.13	0.95	0.64	1.13	1.18	1.26	0.56	0.74	0.26	1.01	0.12	0.13	0.67	0.12	0	0	0	0.14	0.3	0	0.13	0.12	0.26	0.23	0	0.47	0.13	0	0.25	0	0.13	-2.35118	4.97859e-06	0.000401057
novel.19860	255	8.53	0	140.36	0	12.8	13.12	0	0	8.98	21.67	27.9	0	0	0	0	7.13	9.33	0	17.27	9.73	9.76	8.22	224.62	27.93	62.92	8.38	54.98	8.25	6.5	0	21.06	53.95	30.69	45.86	8.62	2.38023	0.00067723	0.0157683
GeneID:101750098	12032	0.04	0.16	0.06	0.02	0.03	0.25	0.04	0.03	0.01	0.1	0.11	0.03	0.03	0.03	0.08	0	0.11	0.08	0.04	0.17	0.21	0.12	0.08	0.28	0.34	0.02	0.32	0.44	0.25	0.11	0.21	0.26	0.12	0.22	0.02	1.49314	0.000101229	0.00398757
GeneID:420899	2095	0.72	0.5	0.67	0.81	0.21	0.36	1.97	1.97	4.35	1.82	0.61	0.13	3.6	1.37	0.9	1.07	0.62	0.31	6.13	0.81	5.71	3.37	1.18	1.45	1.18	3.56	2.44	3.16	2.42	1.67	3.71	4.5	3.4	1.34	2.82	1.16162	0.000768034	0.0171493
novel.13720	965	1	2.29	1.39	1.69	0.29	0.27	0.78	0.66	0.69	1.22	1.17	0.84	0.79	0.99	0.64	1.34	0.61	0.95	0.29	0.11	0.83	0.42	0.45	0.67	0.38	0.27	0.2	0.97	0.26	0.8	1.05	0.49	0.28	0.58	0.58	-1.02785	0.000155391	0.00550637
GeneID:415859	892	1.07	0.13	4.67	1.62	1.89	0.78	0.85	2.88	0.76	0.57	4.36	5.66	4.87	0.38	0.94	2.13	0.57	0.91	10	12.11	5.63	3.84	1.02	20.09	6.05	2.9	8.07	1.74	4.29	7.33	9.94	1.87	4.77	1.94	0.66	1.94297	8.5789e-09	2.19313e-06
GeneID:107049409	2085	1.33	0.36	1.47	0.74	1.26	2.7	0.28	0.56	0.31	0.17	0.61	0.27	0.4	0.58	0.18	0.49	22.08	0.23	0.57	0.87	0.94	0.85	12.36	2.59	0.24	0.18	1.61	0.27	13.05	0.92	0.35	3.3	0.37	2.53	2.34	1.82517	0.000196777	0.00659952
GeneID:416488	1756	0.13	0.27	0	0.25	0.09	0.12	0.09	0.09	0.04	0.04	0.09	0.25	0.13	0.15	0.04	0.04	0.23	0.17	0.69	0.67	0.82	0.38	0.15	0.38	0.6	0.41	2.18	0.16	0.32	0.51	0.51	1.26	0.67	0.26	0.69	2.24792	5.20998e-10	2.37319e-07
GeneID:429951	5151	0.03	0	0.25	0.26	0.01	0.05	1.72	0.24	0.52	0.11	0.06	0	0.25	0.48	0.41	0.09	0.05	0.03	0.23	0.01	0.06	0.14	0.01	0.01	0.01	0.11	0.03	0.02	0.04	0.01	0.15	0.04	0.06	0	0	-2.2437	0.00029904	0.00894847
GeneID:112531141	431	6.81	7.85	7.19	10.09	12.29	11.92	11.76	9.87	12.77	4.99	11.56	40.12	17.15	14.32	7.96	0.87	8.77	9.8	3.03	1.67	20.68	3.87	5.51	2.66	0.23	1.93	3.07	0	9.39	4.17	8.15	0.98	0.97	4.07	25.78	-1.91596	5.32497e-05	0.00246137
GeneID:772080	2217	1.73	0.52	0.88	3.16	0.47	0.91	0.98	1.42	0.64	1.4	1.69	1.74	0.39	0.7	2.25	0.99	0.88	0.46	1.24	0.72	0.24	0.48	0.67	0.51	0.21	30.3	0.51	0.58	0.88	0.43	0.75	0.26	0.7	0.32	1.46	-1.01552	0.000420611	0.0111983
GeneID:107049108	1956	0	0.06	0.04	0	0	0.08	0	0	0	0	0	0	0	0.09	0.04	0.04	0.08	0.51	0.1	0.44	0.5	0	0.31	1.26	0	0.18	0.12	0	1.03	0.7	0.11	2.06	0.2	2.28	0.37	3.40717	8.10277e-06	0.000595304
GeneID:769122	8081	0.76	0.39	1.07	1.02	0.69	0.64	1.25	0.36	1.15	0.58	0.81	0.13	1.03	0.99	1.75	0.42	1.64	1.6	2.9	1.45	1.1	3.05	0.57	1.85	3.13	1.53	1.98	2.17	2.19	1.79	1.21	1.81	1.67	4.53	1.15	1.09281	4.58921e-06	0.00038018
novel.19164	693	7.42	10.83	3.53	8.52	12.69	3.78	11.94	17.78	4.12	3.5	7.69	12.54	6.25	6	3.52	4.14	5.55	4.49	7.01	5.67	5.39	0.56	6.19	9.69	3.06	8.71	5.59	5.69	1.6	3.9	1.81	4	4.27	2	7.97	-1.16423	0.000575773	0.014073
novel.4128	312	0	0	0	7.55	10.28	0	7.86	0	0	0	21.93	5.32	3.39	2.08	0	4.82	6.85	4.65	9.27	17.89	5.66	7.11	19.48	29.61	31.92	0	36.55	5.67	23.9	5.45	16.63	17.11	8.45	27.45	0	1.78143	0.00155041	0.0277843
GeneID:771519	1589	10.12	10.45	7.58	7.7	10.87	12.11	5.64	6.98	9.18	10.32	15.24	4.28	10.25	7.98	9.05	14.7	6.37	9.51	5.32	5.32	0.3	3.82	0.34	6.46	4.14	4.37	0.99	0.62	10.41	8.82	4.18	0.65	8.5	5.83	0.93	-1.22248	9.93573e-05	0.00393238
GeneID:112531929	4282	0.16	0.05	0.13	0.11	0.08	0.22	0.11	0.08	0.05	0.1	0.07	0.03	0.05	0.05	0.12	0.17	0.2	0.12	0.45	0.23	0.22	0.45	0.16	0.25	0.16	0.54	0.25	0.39	0.17	0.17	0.15	0.2	0.26	0.31	0.42	1.3625	4.3803e-08	8.46655e-06
GeneID:419010	3077	1.93	3.05	1.7	0.68	3.67	3.74	1.19	1.73	1.3	2.6	2.11	0.95	2.11	2.38	1.7	3.32	2.4	1.87	2.28	7.85	4.19	3.13	4.19	5.01	6.02	0.61	5.92	7.02	4.8	6.08	6.14	5.54	4.38	1.55	3.26	1.05542	9.47087e-07	0.00010688
GeneID:416101	4880	0.03	0.14	0.02	0.24	0.21	0.21	0.08	0	0.03	0.37	0.19	0.05	0.01	0.36	0.5	0.08	0.45	0.27	0.15	0.33	0.42	0.31	4.64	2.6	2.03	0.1	2.58	1.09	1.12	0.91	0.64	1.94	2.69	4.18	0.92	3.04716	1.61347e-11	1.30394e-08
GeneID:100859414	5246	0.24	0.23	0.08	0.02	0.21	0.08	0.13	0.06	0.05	0.06	0.19	0.12	0.15	0.08	0.1	0.04	0.05	0.13	0.08	0	0	0.05	0.02	0	0	0	0.02	0	0	0	0.03	0	0	0	0	-3.5192	6.6673e-10	2.78393e-07
novel.23383	436	1.68	20.53	6.91	2.24	2.11	4.62	4.11	0.15	2.07	0.49	3.47	1.06	5.62	2.18	3	0.96	4.47	1.82	1.86	0.17	2.53	0.17	0	1.38	1.43	1.58	0.14	0	0.85	2.68	1.99	0.7	1.21	0	1.13	-1.50072	0.000258499	0.00805608
GeneID:396053	3205	0.09	0.12	0.18	0.24	0.09	0.14	0.09	0.02	0.21	0.29	0.06	0	0.04	0.04	0.08	0	0.02	0.07	0.6	0.09	0.31	0.04	0.29	0.15	0.15	0.17	0.34	0.17	0.28	0.13	0.36	0.28	0.25	0.23	0.23	1.15876	0.00108382	0.0217747
GeneID:416277	2548	0.22	0.03	0.03	0	0.08	0.18	0.06	0.03	0.06	0.08	0.06	0.05	0.06	0.13	0.05	0.05	0.06	0.03	0	0.03	0.03	0	0.03	0	0	0.05	0	0	0	0.05	0	0.03	0.08	0.03	0	-1.92171	0.000959562	0.0200108
GeneID:107053197	4479	0.02	0.02	0	0.04	0	0.03	0.04	0	0.02	0.05	0	0	0	0	0	0.03	0	0.01	0.09	0.03	0.08	0.02	0.04	0.05	0.03	0.04	0.03	0.02	0.04	0.04	0	0.04	0.05	0	0.04	1.59687	0.00200783	0.0334234
GeneID:100859134	1361	1.62	62.21	1.56	66.61	74.82	14.52	101.35	88.01	72.48	69.91	64.26	77.65	1.43	1.92	54.06	6.52	39.03	72.49	2.55	8.13	1.52	8.54	4.34	11.29	8.49	5.83	10.16	5.09	10.74	11.14	12.27	27.62	1.5	1.96	28.17	-2.42335	6.85252e-09	1.90751e-06
GeneID:427482	5385	0	0.13	0.02	0.04	0.05	0.05	0.01	0.02	0.05	0.06	0.05	0.01	0	0.03	0	0.07	0.01	0	0.05	0.24	0.05	0.08	0.06	0.19	0.24	0.07	0.26	0.24	0.19	0.24	0.14	0.13	0.15	0.07	0.05	2.03826	7.17385e-08	1.20518e-05
GeneID:107050630	1204	0	0	1.46	0	0	0	0	0	0	0	0	0.08	0	0	0	0	0	0	0	0.3	0	0	0	1.08	0	0	0	3.3	0.26	0.85	0	2.06	0	1.77	0.09	4.59039	0.000221575	0.00723743
GeneID:429280	1384	0.69	3.34	0.93	0.69	0.88	1.12	2.07	0.12	0.71	2.06	0.26	0.3	1.62	3.52	2.02	4.83	3.52	0.63	1.68	1.44	7.17	4.78	5.97	0.75	0.41	0.79	2.59	6.47	2.75	2.93	6.18	5.99	3.03	5.59	3.99	1.13872	0.00198785	0.033179
GeneID:427538	15810	0.01	0.1	0.08	0.02	0.04	0.06	0.05	0.14	0.08	0.12	0.07	0.01	0.11	0.05	0.09	0.02	0.02	0.08	0.02	0.07	0.11	0.11	0.22	0.61	0.26	0.04	0.17	0.22	0.13	0.11	0.12	0.1	0.28	0.16	0.03	1.24544	0.000342833	0.00975111
GeneID:427856	3665	0.27	0.38	0.27	0.14	0.19	0.42	0.89	0.33	1.55	0.19	0.02	0.04	0.13	0.28	0.33	0.11	0.21	0.16	0.04	0.45	0.16	0.02	0.15	0.18	0.26	0.02	0.15	0.15	0.2	0.02	0.13	0.13	0.13	0.2	0.18	-1.22409	0.00213005	0.034833
GeneID:107053660	1711	4.05	10.34	6.23	2	2.13	16.35	2.89	0.93	4.67	10.27	5.62	2.68	4.88	8.51	4.59	6.66	22.33	9.92	10.48	21.13	16.69	19.75	21.72	50.41	49.51	4.54	55.86	23.85	24.5	12.72	12.75	23.27	17.4	25.68	9.49	1.71068	1.36834e-08	3.17418e-06
novel.15558	1213	0.22	0.22	0.25	0.68	0.07	0	0.42	0	0.14	0.25	0	0	0	1.68	0	0	0.07	0.82	0	0	0	0	0	0	0	0	0	0	0	0	0	0	0	0	0	-4.43247	3.69654e-05	0.00186405
GeneID:423959	3072	0.07	0.6	0.1	0.27	0.14	0.81	0.25	0.08	0.44	0.42	0.12	0.29	0.16	0.21	0.37	0.18	0.41	1.07	0.62	0.74	0.36	1.63	1.45	1.43	1.89	0.24	1.2	0.79	0.82	1.48	1.17	1.43	1	0.41	1.1	1.58641	8.55264e-08	1.39136e-05
GeneID:423784	6942	0.49	0.32	0.48	0.24	0.17	0.54	0.26	0.02	0.35	0.46	0.5	0.11	0.2	0.45	0.43	0.85	0.37	0.58	0.37	0.79	0.56	0.81	0.32	2	2.41	0.15	0.98	0.23	1.86	1.7	3.02	0.17	0.34	0.31	0.32	1.30188	0.000273757	0.00837415
GeneID:772367	4135	0.67	2.59	0.89	0.48	1.54	2.39	1.36	0.43	1.71	1.35	1.43	1.04	0.98	1.83	1.54	1.02	3.07	2.32	0.51	1.37	0.68	0.17	0.52	0.71	1.56	0.34	0.53	0.84	0.6	0.36	0.37	1.38	0.76	1.7	0.42	-1.15	4.0737e-07	4.97846e-05
novel.3	1809	0.87	0.44	1.24	0.53	0	0.41	0.26	0.16	0.25	0.71	1.23	0.06	0.31	0.62	0.79	0.2	2.63	0.86	5.8	2.7	2.73	3.08	1.04	4.34	5.52	3.05	6.81	3.1	6.12	5.96	3.58	4.82	4.72	5	1.7	2.53568	3.11951e-14	5.58237e-11
GeneID:100858035	1479	0.17	0.39	0.29	0.1	0.44	0.15	0.11	0.53	0.65	0.15	0.35	0.21	0.55	0.62	0.41	0.27	0.28	0.58	0.05	0.24	0.15	0.06	0.12	0.05	0.05	0	0.33	0.58	0	0.15	0.16	0.16	0.16	0.42	0.21	-1.11555	0.00220855	0.0357613
novel.22495	3352	1	3.12	0.69	1.49	0.93	0.81	0.67	0.17	1.51	2.41	0.93	0.88	1.13	1.16	0.55	3.64	1.99	3.2	1.28	5.02	2.56	3.02	0.53	4.89	6.94	1.38	3.58	3.62	5.32	4.68	4.32	1.21	2.33	5.92	4.03	1.2367	2.00666e-05	0.00118026
GeneID:420361	3278	127.57	276.95	252.83	321.8	185.73	166.79	391.16	180	427.52	242.59	87.22	103.85	239.58	355.52	489.4	132.9	264.81	194.88	57.53	73.41	68.66	100.35	28.87	48.1	133.03	224.99	80.91	199.6	144.26	209.02	223.9	122.91	59.87	158.46	157.82	-1.06932	1.11663e-05	0.000762259
GeneID:395077	1440	12.7	28.44	8.67	9.13	47.68	6.81	9.44	13.25	8.96	13.42	18.75	41.85	9.06	8.65	18.22	20.84	11.02	17.01	12.9	18.8	3.77	14.21	7.58	8.89	10.62	3.6	10.03	0.58	12.74	16.83	16.5	3.67	8.68	3.24	3.76	-1.0317	0.00148553	0.0271083
novel.23916	1860	0.42	0.24	0.4	0.32	0.27	0.98	0.52	0	0.57	0.7	1.22	0	0	0.4	0.16	0.65	1.65	0.28	0.64	0.68	3.1	0.37	0.84	0.98	2.11	0.58	0.87	0.97	0.47	1.3	0.83	1.11	5.03	0.51	0.9	1.3444	0.000296143	0.00887473
novel.8270	2495	0	0.03	0	0.03	0	0	0	0.03	0	0	0.09	0.19	0.06	0	0.03	0	0	0.03	0.34	0	0	0.25	0	0.31	0.77	0.03	1.18	0.08	0.63	0.52	0.47	0.29	0	0	0.03	3.20372	9.73335e-05	0.00386449
GeneID:770263	1282	0.27	0.13	0.47	0.38	0.46	0.18	0.26	0.32	0.2	0.24	0.14	0.56	1.78	0.15	0.12	0.71	0.82	0.13	1.3	0.79	5.65	1.05	0.75	0.83	0.71	0.79	0.72	0.23	2.83	0.41	0.44	0.59	0.19	0.83	5.87	1.69917	8.80148e-05	0.00357489
GeneID:107052037	1026	0.49	0.09	0.08	0.55	0	0.27	0.19	0.46	0.19	0.42	0.1	0.18	0.16	0.11	0.31	0.19	0.19	0.94	0.81	0.11	0.62	0.26	1.71	0.64	0.46	0.37	0.29	1.25	0.59	0.76	1.2	0.32	0.54	0.94	0	1.13386	0.00354476	0.0488755
novel.4735	211	94.71	108.15	0	105.84	175.14	152.59	225.92	276.79	304.92	102.26	38.89	329.8	61.77	95.59	26.29	26.56	0	346.2	0	0	33.02	25.62	88.5	0	120.09	32.52	0	0	75.67	0	0	37.02	67.4	76.22	0	-2.56105	5.48358e-05	0.00251152
GeneID:112530621	1154	2.33	0.8	6.91	4.25	8.02	4	3.13	13.86	8	2.48	1.58	5.34	1.1	6.98	6.39	4.5	8.17	21.43	0.45	0.28	2.37	2.5	2.25	9.55	4.27	0.51	0.76	2	4.19	0.21	1.59	0.36	0.8	2.02	2.58	-1.64474	6.88451e-05	0.00296863
GeneID:112532757	3193	0.09	0.07	0	0.02	0	0.14	0.04	0.02	0.11	0.08	0.26	0.06	0.02	0.1	0.04	0.13	0.14	0.21	0.24	0.36	0.18	0.12	0.1	0.15	0.15	0.06	0.07	0.51	0.08	0.12	0.19	0.32	0.54	0.47	0.3	1.38872	0.000178003	0.00609222
novel.5057	1330	0.38	0	0.06	0	0.25	2.08	0	0	0.19	0	0	0	0	0.99	0	0.24	0	1.39	0	0	0	0	0	0.06	0	0	0	0	0	0.11	0	0	0	0	0	-4.30524	0.000724703	0.0163863
novel.3086	6523	0.09	0.69	0.12	0.22	0	0.17	0	0.09	0.09	0.37	0.05	0	0.09	0.1	0.17	0.27	0.14	0.31	0.04	0.24	0.59	0.3	0.1	1.1	0.49	0.21	0.27	0.36	0.37	0.37	0.73	0.31	1.08	0.56	0.18	1.36534	0.00119085	0.0232827
GeneID:395634	4196	0.48	0.88	0.09	0.22	0.16	0.64	0.18	0.16	0.45	0.19	0.1	0.12	0.39	0.26	0.14	0.41	0.97	0.43	0.38	1.84	0.78	0.31	0.43	0.78	0.94	0.44	0.6	1.5	0.54	0.7	0.55	1.97	0.74	1.13	0.81	1.26406	9.85776e-06	0.00068985
GeneID:101751538	4319	0	0	0	0	0	0	0	0	0	0.06	0	0	0	0	0	0.07	0.07	0.09	0.03	0.12	0.08	0.07	0.11	0.12	0.16	0.02	0.13	0	0.08	0.03	0.03	0.18	0.12	0.05	0	2.17835	0.000951895	0.0199064
GeneID:100858463	5105	0.01	0	0.02	0.02	0	0.05	0	0.02	0.1	0.07	0.03	0	0	0	0.03	0	0	0.03	0.05	0	0.03	0.03	0.12	0.62	0.14	0.02	0.11	0.02	0	0	0	0.05	0.2	0	0.03	2.43342	0.00248433	0.0385865
GeneID:395903	3914	0.11	0.07	0.14	0.1	0.09	0.24	0.11	0.11	0.09	0.14	0.11	0.17	0.17	0.12	0.15	0.27	0.16	0.32	0.26	0.44	0.73	0.25	0.41	0.63	0.36	0.18	0.58	0.69	0.59	0.49	0.45	0.35	0.88	0.48	0.21	1.56216	7.85677e-13	9.84179e-10
GeneID:101749904	1544	0.55	0.92	0.32	0.51	0.24	0	0.41	0.29	0.71	0.37	0.51	0.3	0.73	0.54	0.5	0.18	0.74	0.23	0.47	1.11	1.82	2.43	2.31	2.2	2.16	0.17	4.44	2.15	2.25	0.85	1.42	1.24	1	2.18	1.87	2.00262	4.72624e-12	4.38543e-09
novel.1918	1319	0.06	0	0.06	0	0.06	0	0.06	0.06	0	0.06	0	0	0.06	0	0	0	0	0	0	0.21	1.18	0	0.43	0	0	0.47	0	0.06	0.06	0	0	0.06	0.73	0.06	0.12	2.90942	0.00129017	0.0245365
GeneID:396311	6412	3.17	2.94	3.66	3.71	0.6	2.86	8.43	10.18	14.45	6.45	0.87	1.27	12.18	2.66	1.57	2.84	1.83	1.39	10.51	2.92	16.76	10.72	6.35	5.26	2.46	16.94	7.68	14.75	10.97	6.8	9.78	11.93	6.75	6.72	14.92	1.12463	0.000902522	0.0191455
GeneID:101748212	1229	0.53	0.33	0.87	0.78	1.91	0.6	0.27	1.5	1.19	0.24	0.49	0.56	1.65	0.81	0.43	0.83	0.74	0.88	0.19	0.21	0.86	0.29	1.14	0.18	0.71	0.34	0.64	0.08	0.24	0.25	0.09	0.52	0.81	0.09	0.27	-1.18149	0.00043716	0.0114977
novel.2092	3293	0	0.64	0.69	0.15	0.95	0	0.25	0.12	0.13	0.41	0.31	0.05	0.1	0.67	0.48	0.13	0.65	0.16	0	1.23	1.17	8.56	0.77	0.86	0.95	0.58	0.96	0.57	0.93	0.12	1.75	0.3	0.63	0.98	0.26	1.87173	0.000325094	0.00940482
novel.8905	1712	0.4	0.62	1.22	0.48	1.72	3.78	3.07	2.69	2.06	1.46	2.45	2.41	0.92	0.16	2.37	0.45	3.74	2.75	2.52	5.62	5.05	1.72	2.78	4.91	4.56	3.14	4.12	3.69	2.92	3.49	5.83	2.57	4.39	3.5	3.84	1.04464	0.000166136	0.00578887
GeneID:425030	5967	0.02	0.08	0.14	0.05	0.01	0.04	0.07	0.01	0.04	0.05	0.06	0.01	0.06	0.01	0.06	0.03	0.03	0.11	0.08	0.03	0.33	0.03	0.14	0.21	0.15	0.02	0.08	0.17	0.06	0.08	0.12	0.08	0.15	0.1	0.46	1.43979	0.000110491	0.00425866
GeneID:107053617	7351	0	0	0.03	0.02	0.04	0.08	0	0	0	0.01	0.02	0.02	0.02	0.1	0.02	0	0.02	0.05	0.03	0.11	0.02	0.11	0.08	0.15	0.03	0	0.12	0.11	0.05	0.06	0.06	0.18	0.02	0.04	0.02	1.52123	0.00263542	0.0401857
novel.6125	960	0.51	0.1	0.52	0.28	0	0.36	0.29	0.19	3.29	0.71	0.21	0.28	2.49	0.89	0.18	0.39	0.31	0.48	0.78	0.65	5.85	0.84	1.58	1.36	0.29	1.47	2.18	2.39	2.03	6.16	6.34	1.09	4.67	0.88	0.59	1.78619	5.89553e-05	0.00264697
GeneID:416651	501	458.19	892.92	516.12	1074.4	247.76	557.28	1850.11	2960.54	1768.9	683.35	196.55	490.28	1933.55	274.05	276.95	456.17	626.23	173.4	5520.21	871.83	7382.07	2826.78	2428.43	1986.41	1052.25	4075.73	3099.24	5874.92	3506.54	1518.42	2409.97	4934.2	2231.8	4253.48	4730.82	1.85844	1.97546e-08	4.34133e-06
novel.16934	884	0.23	0.23	0.4	0.21	0.34	0.31	0.45	0.54	0.11	0	0.12	0.21	0.45	0.13	0.31	0	0.23	0	0.89	0.37	2.33	0.48	0.26	0.66	0.22	1.36	0.9	2.92	0.6	0.3	0.77	1.7	1.95	0.89	0.67	1.97141	9.54019e-07	0.00010718
GeneID:107053292	10887	0.05	0.02	0.07	0.11	0.01	0.08	0.02	0.03	0.04	0.08	0.1	0	0.02	0.08	0.12	0.08	0.09	0.16	0.03	0.05	0.02	0.05	0.03	0.02	0.04	0.02	0.04	0.05	0.03	0.01	0	0.02	0.03	0.09	0.01	-1.0723	0.00223495	0.0359226
GeneID:107054402	8095	0.01	0.01	0.03	0.15	0.01	0.04	0.06	0.03	0.02	0.04	0.03	0	0.05	0	0.05	0	0.01	0	0.94	0.14	0.1	0.55	0	0.07	0.05	0.05	0	0.01	0.24	0.17	0.05	0.01	0.01	0.02	0.15	2.37294	0.000331763	0.00954267
GeneID:107050343	516	117.4	4.56	7.95	30.39	29.38	7.91	39.92	5.74	19.27	10.96	4.54	35.88	18.33	22.6	53.67	12.27	18.89	5.36	45.23	17.66	12.62	72.09	12.67	32.44	29.04	66.69	22.67	98.61	19.8	22.96	58.82	26.34	30.9	84.49	98.31	1.25795	1.21786e-08	2.90583e-06
novel.23127	2947	1.2	1.3	6.09	2.71	3.23	1.39	2.39	5.99	5.61	2.19	1.09	1.92	1.61	6.99	4.95	4.57	5.43	12.09	0.9	0.44	1.67	0.97	2.2	9.15	2.52	0.7	1.23	1.14	4.23	0.72	2.93	0.36	1.94	2.66	1.9	-1.00815	0.00359457	0.0493721
GeneID:424989	7294	0.03	0.01	0	0.01	0.09	0.03	0.03	0.03	0	0.02	0.01	0.02	0.02	0.05	0.04	0.03	0.01	0.02	0.01	0	0.01	0	0.02	0	0.03	0.01	0.02	0	0.02	0.01	0.01	0.01	0	0.02	0	-1.58015	0.00359688	0.0493768
novel.20741	363	21.96	10.07	0	5.4	29.23	14.64	8.14	6.42	3.99	2.79	6.39	4.75	17.62	14.2	16.42	1.08	11.01	9.71	4.03	7.17	5.58	4.81	4.58	3.28	3.64	3.2	6.52	6.16	11.55	4.07	2.55	0	4.64	1.61	5.5	-1.3599	0.000681859	0.0158172
GeneID:428696	1300	0.2	0.39	0	0.31	0	0.42	0.06	0	0.06	0.12	0.21	0.31	0.13	0.07	0.36	0	0	0.62	0.25	0.21	0.36	0.07	1.4	0.38	0.19	0.24	0.26	1.26	0.29	0.17	0.25	0.96	1.48	0.63	0.63	1.444	0.00197783	0.0330991
GeneID:420171	2533	0.03	0.11	0.05	0.11	0.06	0	0.03	0.11	0.09	0.1	0.06	0	0.03	0.03	0.11	0.08	0.03	0	0	0.28	0.13	0.28	0.55	0.66	0.75	0.08	1.58	0.05	0	0.37	0.34	1.57	0.33	0	0.45	2.82941	2.94992e-07	3.80951e-05
GeneID:112533336	3048	0.12	0.23	0.08	0.09	0.23	0.13	0.02	0.09	0.05	0.06	0.02	0.07	0.05	0.05	0.06	0.09	0.05	0.07	0	0.1	0.06	0	0	0.02	0.07	0	0.11	0.04	0.06	0.04	0	0.02	0.04	0	0	-1.44626	0.00163528	0.0286942
novel.23232	1790	0.85	0.76	1.22	0.04	0.81	1.32	0.6	0.04	0.24	0.16	0.08	0.25	0.16	0.35	0.95	0	0.15	0.58	0.32	0.56	1.64	3.88	2.68	6.06	3.19	0.05	1.77	0.64	0.5	4.38	8.03	0.95	1.17	0.86	0.72	2.14694	1.15927e-05	0.000783629
GeneID:100859067	3876	0	0.04	0.07	0	0.02	0.03	0.09	0.09	0	0.03	0	0.17	0	0	0.03	0	0.02	0.05	0.07	0	0.17	0.09	0	0.03	0.08	0.21	0.35	0.09	0.1	0.03	0.1	0.02	0	0.24	0.07	1.8946	0.000882978	0.0188892
GeneID:429485	1188	34.95	21.57	14.75	20.37	13.5	20.56	39.78	42.55	49.53	22.21	8.6	29.83	28.91	13.21	23.49	16.37	20.49	24.5	9.23	37.69	10.09	12.21	1.17	35.54	17.6	3.85	32.95	6.58	7.5	19.99	15.64	5.72	11.85	10.96	7.92	-1.44484	3.3129e-07	4.19182e-05
GeneID:101751669	2233	0.03	0	0.11	0	0	0.08	0.07	0	0.03	0.03	0.04	0	0	0	0	0	0	0.06	0.23	0.04	0.18	0.04	0.09	0.16	0.29	0.15	0.03	0	0.15	0.12	0.06	0.13	0.06	0	0.06	2.09962	0.000428667	0.0113411
GeneID:107050773	610	3.19	3.17	2.67	3.13	11.99	8.79	0.22	8.71	3.17	1.89	3.1	4.22	2	1.46	1.85	2.34	10.74	3.99	0.66	3.65	0.21	1.14	0.5	0	0.21	0	0.45	4.4	0	0.99	0	0.46	1.08	0.67	5.51	-2.12957	2.28253e-05	0.00130557
GeneID:103875463	1475	6.14	5.16	1.01	0.57	0.5	0.46	0.96	1.07	1.14	0.28	0.93	0.85	3.45	0.61	0.46	1.17	0.96	0.15	2.83	1.84	4.84	0.84	1.02	1.43	3.5	0.55	1.36	3.39	3.39	3.6	5.33	0.71	4	7.93	1.97	1.15762	0.000573417	0.0140566
GeneID:423016	1263	0.55	0.75	0.83	1.34	0.54	0.87	0.4	1.49	0.6	1.14	2.52	2.17	0.74	1.82	1.06	2.22	1.39	0.06	0.2	0.59	0.31	0.14	0.31	0.52	0.2	0.68	0.4	1.67	0.36	0.06	0.19	0.87	0.58	0.72	0.46	-1.35046	7.8726e-05	0.00327531
novel.5400	1115	0.32	0.4	0.56	0.08	0	0.15	0.24	0	0.08	0.21	0.26	0	0.08	0.36	0	0.31	0.33	0.08	0.39	0.17	0.82	0.51	0.36	0.86	0.23	0.37	0.4	0.71	0.07	0.57	0.23	0.48	1.07	0.86	0.23	1.29197	0.000708007	0.0161788
GeneID:396314	2884	1.78	2.01	1.2	0.42	1.7	0.93	1.83	1.31	1.18	0.53	1.05	1.5	0.9	0	1.38	0.59	1.15	0.74	0.22	0.64	0.94	0.11	0.7	0.69	0.43	0.82	0.66	1.94	0.13	0.53	0.26	0.58	0.73	0.2	0.46	-1.06485	0.0011755	0.0230979
novel.24003	2578	0.12	0.13	2.12	0.38	1.4	0.27	0.13	1.73	0.37	0.12	0.19	0.09	0.24	1	0.34	0.65	1.82	2.76	0.08	0.04	0.18	0	0.4	0.8	0.32	0.19	0.08	0.32	0.65	0	0.18	0.03	0.43	0.24	0.13	-1.85131	0.000314036	0.00921258
GeneID:418359	5456	0.02	0	0.03	0.09	0.04	0.05	0.04	0.07	0.07	0.2	0.12	0.03	0.03	0.14	0.36	0.11	0.07	0.11	0.15	0.05	0.18	0.09	0.19	1.2	0.33	0.12	0.21	0.08	0.09	0.11	0.1	0.11	0.4	0.12	0.1	1.20219	0.00303316	0.0441287
novel.5144	8621	0	0.02	0	0	0	0.02	0.01	0.01	0.03	0.07	0	0	0.02	0	0.01	0	0.01	0.08	0.01	0.01	0	0.02	0.17	0.54	0.15	0	0.12	0	0.01	0.03	0.08	0	0.23	0.15	0.01	2.57564	0.000383989	0.0105531
GeneID:101748090	9427	0.05	0.15	0.03	0.04	0.04	0.1	0.02	0.02	0.01	0.05	0.03	0.01	0.11	0.02	0.02	0.02	0.11	0.07	0.07	0.11	0.29	0.2	0.26	0.14	0.21	0.05	0.09	0.19	0.09	0.18	0.1	0.13	0.09	0.33	0.23	1.55339	2.71653e-07	3.58196e-05
GeneID:112529934	824	0.07	0.13	0.45	0	0.07	0.23	0	0.31	0.21	0.51	0.55	0.31	0.29	1.18	0	0.9	0.69	0.34	0.36	2.61	0.49	2.48	9.02	1.4	2.24	1.65	1.6	3.85	2.41	3.33	2.94	0.31	1.6	9.76	3.11	2.42507	8.47366e-10	3.48017e-07
GeneID:100858862	423	2.03	3.93	1.06	5.34	0	0	0	0	0	1.05	1.71	0.64	1.92	0.64	0	0.65	0.72	1.83	0	2.1	0	0	0	0	0	0.62	0	0	0	0	0	0	0	0	0.63	-2.57601	0.00273562	0.0411872
novel.22425	2371	57.05	14.24	47.01	16.63	50.84	33.55	42.62	6.82	11	14.61	13.02	11.82	17.1	14.43	86.03	18.52	19.2	14.83	16.43	79.24	38.2	92.83	89.85	19.18	83.85	43.49	95.52	45.12	27.65	30.34	41.33	75.35	76.47	66.77	60.03	1.25728	2.10027e-06	0.000200069
novel.19631	4939	0.19	0.3	0.32	0.81	0	0.32	0.24	0.13	0.31	0.21	0.23	0.03	0.21	0.15	0.26	0.24	0.4	0.28	0.27	0.39	0.87	0.63	0.6	0.46	0.75	0.28	0.38	0.6	1.04	0.06	1.35	0.2	0.3	0.5	0.42	1.01563	0.00136504	0.0255402
novel.1386	616	0	0	1.01	0	0.57	0	0	0.2	0	0	0	0	0	0	0	0	0.35	0	2	1.8	0	1.01	0	2.3	0.31	0	2.75	0	2.58	2.74	1.14	0.58	0	0	0	3.15998	0.00143609	0.0264933
novel.10710	795	0	0	0	0.25	0	0	0.36	0.17	0	0	0.55	1.17	0	0.7	0	0	1.88	0	0.63	3.72	2.03	1.9	3.96	13.15	13.61	0.36	7.4	1.14	6.69	3.24	4.16	1.96	2.14	0.84	0	3.92738	5.86734e-09	1.71818e-06
GeneID:769317	8898	0.01	0	0.01	0.01	0	0.01	0.01	0.01	0.01	0.01	0.02	0	0	0.01	0	0	0	0.01	0	0	0	0.06	0.03	0.03	0.01	0.03	0.09	0	0.01	0.05	0.01	0.04	0	0.11	0.09	2.30629	0.000553202	0.0137332
GeneID:430542	2486	13.66	15.67	5.38	9.1	4.57	16.85	8.76	7	8.8	8.15	11.79	6.48	11.87	13.38	6.13	9.07	10.35	14.61	4.6	3.65	8.11	0.93	3.25	2.61	2.53	1.99	7.96	5.3	2.17	3.44	3.28	14.93	3.71	6.72	2.09	-1.26581	6.95366e-08	1.19615e-05
GeneID:107050632	1037	0.36	0.54	0.39	0.34	0	0.24	0.17	0	0.44	0.39	0.48	0	0	0.7	0.16	0.52	0.37	0.17	0	0	0	0	0	0.09	0.09	0	0.09	0	0.08	0	0.09	0.27	0	0	0	-2.88158	1.10566e-05	0.000756835
GeneID:395837	1594	0.2	0	2.68	0.28	0.15	4.32	2.1	0.1	0.79	0.09	0	0.19	0.35	0.51	12.34	3.92	0.15	21.97	0.59	0	0.09	0.27	0.28	0.05	0.1	0.82	2.02	0.04	0.18	1.03	0.33	13.56	0.43	0.19	0.39	-2.72805	0.000148521	0.00531952
GeneID:417035	1327	4.94	8.19	8.66	11.67	0.35	4.47	19.15	2.53	13.25	8.48	3.86	1.18	13.82	5.82	1.6	12.87	4.17	1.82	22.81	9.61	42.07	25.32	8.28	12.65	4.96	55.7	15.17	24.46	17.76	13.25	18.36	12.64	11.6	35.89	13.04	1.44845	5.99465e-05	0.00266756
GeneID:112532665	449	2.69	6.97	7.57	6.87	0.45	11.06	7.09	4.29	1.56	7.76	2.46	3.54	3.53	2.61	3.83	10.19	0.3	4.82	3.27	3.8	1.13	1.99	5.92	2.64	2.3	0.14	0.23	3.87	1.25	0.42	0.43	0	1.36	1.81	5.55	-2.02072	7.57667e-08	1.25707e-05
GeneID:112532975	668	0	0.94	0.16	0.53	0	0.17	0.18	0.18	0	0	1	1.05	0.37	0.41	0.17	0.18	0.96	0.18	0	0	0	0.38	0	0	0	0	0	0	0	0	0.36	0	0	0	0	-2.86177	0.000397161	0.0108036
GeneID:112531607	10647	0.05	0.03	0.03	0.06	0.06	0.05	0.01	0.02	0.03	0.05	0.02	0.03	0.01	0.03	0.02	0.01	0.03	0.04	0.09	0.07	0.04	0.08	0.1	0.09	0.08	0.01	0.1	0.06	0.07	0.1	0.14	0.13	0.08	0.04	0.05	1.22506	9.02398e-06	0.000647787
GeneID:424352	9098	0.02	0.02	0.02	0.03	0.02	0.02	0.01	0.01	0.02	0.01	0.09	0	0.05	0.05	0.01	0.06	0.11	0.08	0.07	0.15	0.1	0.02	0.05	0.19	0.14	0.03	0.12	0.17	0.1	0.12	0.12	0.1	0.05	0.1	0.03	1.45726	2.53127e-05	0.00142188
GeneID:771832	1332	2.94	1.21	1.17	3.54	1.9	1.28	2.8	4.41	3.63	0.61	2.13	3	1.48	1.31	5.07	1.31	1.34	0.78	1.31	1.48	1.22	0.35	1.57	1.43	1.27	1.53	2	1.14	0.79	0.86	1.49	0.89	2.25	1.31	1	-1.12521	7.56631e-06	0.000564163
novel.23773	1796	1.35	0.17	0.74	0.29	0.4	1.07	0.4	0.07	0.19	0.32	0.08	0.08	0.17	0.93	0.54	0.44	1.02	0.43	1.01	0.51	6.94	0.48	0.83	8.78	2.17	7.03	3.13	15.65	1.73	1.62	0.27	1.19	0.62	15.92	11.88	3.25855	9.06297e-12	7.82947e-09
GeneID:112532968	13843	0.01	0	0.02	0.01	0	0.01	0.01	0	0.01	0.03	0.04	0.01	0	0.01	0.02	0.01	0	0.02	0.03	0.04	0.08	0	0.04	0.03	0.07	0.01	0.05	0.02	0.11	0.02	0.09	0.02	0.01	0.07	0.02	1.80415	8.35204e-06	0.00061004
GeneID:422078	1593	0.75	1.13	0.25	27.74	0.51	0.8	14.59	3.89	5.73	0.81	0.5	0.82	0.6	1.97	17.71	1.42	1.62	0.18	2.43	0.43	0.05	1.45	0.12	0.19	0.21	4.32	0.24	1.37	0.3	0.41	0.3	0.36	0.35	0.39	1.65	-2.39764	7.0299e-05	0.00302093
GeneID:424820	2706	0.01	0	0.01	0	0	0.07	0.01	0.06	0	0	0.01	0	0	0	0	0.01	0.05	0.03	0.24	0.18	0.11	0.09	0	0.06	0.16	0	0	0.02	0.24	0.32	0.09	0	0	0.04	0.18	2.42618	0.000373852	0.0103837
GeneID:415652	539	14	11.54	39.53	139.84	22.75	35.91	83.26	67.88	55.03	21.66	21.27	67.29	20.71	12.76	26.87	11	12.04	12.54	79.84	9.41	14.13	32.22	19.27	8.09	8.72	465.57	10.96	19.03	6.58	6.32	5.34	31.51	17.09	16.33	25.43	-1.10356	0.00298162	0.0436069
GeneID:771069	1469	13.66	12.41	28.51	21.52	18.02	8.71	38.84	47.83	24.51	15.59	15.21	21.22	28.31	24.45	52.99	9.48	9.65	6.34	16.71	10.1	9.71	19.11	9.62	5.87	6.19	9.19	8.62	8.39	8.22	5.66	8.47	11.29	11.75	6.71	20.58	-1.1738	4.47311e-06	0.000372308
novel.3876	659	0.26	1.08	0.36	0.18	0	0.69	0	0	0	0.35	0	0	1.91	0	0	0.18	2.91	0	2.56	1.23	3.57	0.79	3.73	1.55	8.38	2.33	1.34	3.31	0.99	8.81	0.71	4.8	3.93	4.72	2.44	2.88986	7.94863e-08	1.30155e-05
GeneID:107050685	2818	0	0	0.23	0.04	0.06	0.04	0	0	0.01	0.07	0.18	0	0.04	0	0	0	0.06	0.16	0.11	0.19	0	1.1	0.54	3.02	0.02	0	0.35	0	0.26	0	0.72	3.24	0.03	6.63	0.48	4.67664	4.03864e-08	7.96694e-06
novel.5491	1712	0.18	0.18	0.12	0.22	0.23	0.13	0.31	0.13	0.09	0.08	0.24	0.47	0.09	0.26	0.04	0	0.42	0.22	0.45	0.84	0.3	0.49	0.67	0.57	0.71	0.08	2.43	1.37	0.98	0.41	1	0.9	0.43	1.59	0.62	1.97161	7.89264e-09	2.13678e-06
novel.7739	205	40.13	379.46	63.2	40.12	177.73	354.08	43.28	33.8	0	32.46	0	153.68	0	117.28	67.63	0	203.66	254.15	113.85	51.39	0	0	0	0	75.04	48.53	41.46	0	0	0	81.35	165.34	0	46.19	0	-2.21865	0.00280474	0.0420258
GeneID:112530148	3958	0.05	0.11	0	0.02	0.02	0.06	0	0.17	0.02	0	0	0.03	0.03	0.02	0.05	0.14	0.04	0.03	0.05	0.04	0	0	0	0	0	0.02	0	0	0	0	0	0.03	0.02	0	0	-2.35455	0.00216607	0.0352609
GeneID:107052794	2964	0	0	0	0	0	0	0.05	0	0.02	0	0	0	0	0	0	0	0	0.02	0.03	0.03	0.03	0.03	0	0.02	0	0.33	0	0.08	0	0.02	0	0.09	0	0.02	0.07	2.76738	0.00313801	0.0450267
GeneID:100359387	3883	0.08	0.31	0.19	0.25	0	0.12	0.03	0.08	0.05	0.15	0.04	0.14	1.28	0.1	0.08	0.36	0.14	0.17	3.13	0.41	3.17	0.56	0.09	0.56	0.36	0.79	0.25	0.16	1.13	0.3	0.22	0.34	0.16	0.46	1.9	2.09188	2.07501e-05	0.00121177
novel.21271	1344	0	0.08	0.58	0.33	0	3.31	0	0.14	0	0.89	1.11	0	0	0.29	0	0	0	0.95	0	0	0.14	0	0	0.25	0.1	0	0	0	4.39	0.23	0.16	0	0	0	0	-3.11854	0.0028182	0.0421016
novel.23119	712	0	0	1.99	0	0.4	0	2.4	0	0	0.14	0.19	0	0.37	0.69	0	0	0	0.17	0.83	1.02	2.88	5.73	1.37	6.36	3.81	6.84	2.07	3.37	2.13	2.21	1.41	3.36	2.11	5.47	6.45	3.25223	1.48948e-05	0.000959276
GeneID:100858226	1401	5.92	28.4	13.04	14.11	13.32	10.07	4.65	12.69	18.53	14.43	20.77	37.81	32.15	17.93	5.75	5.05	10.43	3.99	3.53	2.02	7.13	10.45	10.65	4.57	0.26	1.41	4.08	1.46	22.1	6.22	9.06	5.47	6.8	4.52	8.17	-1.23911	0.000562173	0.0138459
GeneID:395900	2037	0.48	0.26	0.36	0.41	0.41	0.31	0.74	0.43	0.29	0.43	0.24	0.31	0.33	0.58	0.21	0.69	0.34	0.28	0.3	0.16	0.14	0.08	0.02	0.32	0.18	0.03	0.04	0.26	0.01	0.07	0.11	0.18	0.08	0.09	0.02	-1.68094	7.04971e-08	1.1992e-05
GeneID:100859834	2208	0.27	0.19	0.1	0.13	0.26	0.33	0.11	0.13	0.12	0.14	0.15	0.18	0.3	0.11	0.16	0.57	0.17	0.13	0.1	0.04	0.1	0.01	0.08	0.03	0.1	0.03	0.1	0.13	0.07	0.01	0.04	0.03	0.04	0.03	0.03	-2.3591	0.00092875	0.0195858
GeneID:769421	3582	6.18	19.24	3.99	3.56	15.04	6.4	6.97	7.14	3.1	14.03	3.77	3.56	5.27	6.82	4.75	15.78	9.22	9.33	6.52	25.69	13.01	5.03	8.6	28.24	15.32	5.6	23.55	43.5	11.89	16	18.73	20.99	11.63	10.45	13.72	1.03012	0.000116306	0.00440318

## Sheet: Table S3
Taple S3: The top 20 significant KEGG enriched pathways of BY and Cobb chicken
KEGG Pathway	Pathway ID	Gene Number	Background number	rich factor	P-Value	Q-Value	Gene IDs
Natural killer cell mediated cytotoxicity	ko04650	14	133	0.105263	1.54654e-06	0.000239713	GeneID:417057,novel.23011,GeneID:100859032,GeneID:107049114,GeneID:112533563,GeneID:427746,GeneID:100859414,GeneID:100859134,GeneID:107050833,GeneID:101750160,GeneID:768350,GeneID:112529954,GeneID:417058,GeneID:768614
Phagosome	ko04145	15	180	0.0833333	1.20806e-05	0.000936244	GeneID:396427,GeneID:417057,novel.23011,GeneID:100859134,GeneID:107053357,GeneID:427746,GeneID:107049114,GeneID:100857227,GeneID:107050833,GeneID:100857858,GeneID:396426,GeneID:417058,GeneID:768350,GeneID:112529954,GeneID:101750160
Neuroactive ligand-receptor interaction	ko04080	20	330	0.0606061	5.0564e-05	0.00261247	GeneID:427800,GeneID:428696,GeneID:427907,GeneID:417883,GeneID:423016,GeneID:427633,GeneID:420386,GeneID:422411,GeneID:419914,GeneID:395522,GeneID:101747873,GeneID:421815,GeneID:422771,GeneID:772096,GeneID:424833,GeneID:408184,GeneID:417965,GeneID:429951,GeneID:770710,GeneID:430495
Cytokine-cytokine receptor interaction	ko04060	15	215	0.0697674	9.56594e-05	0.0037068	GeneID:100859414,GeneID:100857191,GeneID:408035,GeneID:427406,GeneID:100859032,GeneID:396495,GeneID:107052553,GeneID:395337,GeneID:415652,GeneID:768614,GeneID:415651,GeneID:408184,GeneID:395096,GeneID:395468,GeneID:395551
Antigen processing and presentation	ko04612	8	69	0.115942	0.000142794	0.00442662	GeneID:427746,GeneID:107049114,GeneID:100859134,GeneID:417057,GeneID:768350,GeneID:112529954,GeneID:417058,GeneID:107050833
Cytosolic DNA-sensing pathway	ko04623	7	55	0.127273	0.000207266	0.00535437	GeneID:107052553,GeneID:395551,GeneID:100859032,GeneID:395468,GeneID:100859414,GeneID:395337,GeneID:768614
ECM-receptor interaction	ko04512	9	94	0.0957447	0.000244051	0.00540398	GeneID:100858226,GeneID:396000,GeneID:424799,GeneID:431597,GeneID:396292,GeneID:395935,GeneID:107049014,GeneID:424797,GeneID:100857227
NOD-like receptor signaling pathway	ko04621	11	139	0.0791367	0.000279269	0.00541084	GeneID:396495,GeneID:100859032,GeneID:414337,GeneID:424835,GeneID:107052553,GeneID:100859414,GeneID:100858343,GeneID:417603,GeneID:768614,GeneID:395337,GeneID:420407
Toll-like receptor signaling pathway	ko04620	9	100	0.09	0.000388627	0.00669302	GeneID:395468,GeneID:768614,GeneID:395337,GeneID:395551,GeneID:100859414,GeneID:107052553,GeneID:107055074,GeneID:396495,GeneID:100859032
Cell adhesion molecules (CAMs)	ko04514	10	150	0.0666667	0.00195943	0.0303711	GeneID:107050833,GeneID:112529954,GeneID:768350,GeneID:417058,GeneID:417057,GeneID:107055074,GeneID:427746,GeneID:107049114,GeneID:415860,GeneID:100859134
Salivary secretion	ko04970	7	87	0.0804598	0.00326254	0.0459721	GeneID:414337,GeneID:107053714,GeneID:107049019,GeneID:420407,GeneID:100858343,GeneID:112533563,GeneID:101748207
Gap junction	ko04540	7	97	0.0721649	0.00594674	0.0709034	GeneID:396427,GeneID:408035,GeneID:107053357,GeneID:427633,GeneID:100857858,GeneID:396426,GeneID:112533563
PI3K-Akt signaling pathway	ko04151	16	354	0.0451977	0.00594034	0.0709034	GeneID:100859414,GeneID:396000,novel.23011,GeneID:107052553,GeneID:768614,GeneID:424799,GeneID:408184,GeneID:408035,GeneID:100859032,GeneID:395337,GeneID:771832,GeneID:101750160,GeneID:395935,GeneID:396292,GeneID:424797,GeneID:100857227
Complement and coagulation cascades	ko04610	6	82	0.0731707	0.00994887	0.110148	GeneID:373926,GeneID:395837,GeneID:395085,GeneID:395935,GeneID:396307,GeneID:107050315
NF-kappa B signaling pathway	ko04064	7	110	0.0636364	0.0115575	0.119428	novel.23011,GeneID:395551,GeneID:427406,GeneID:396495,GeneID:101750160,GeneID:395468,GeneID:100857191
Intestinal immune network for IgA production	ko04672	12	69	0.173913	0.0365355	0.263741	novel.21084,GeneID:107052553,novel.23009,GeneID:101750160,GeneID:396249,GeneID:100858236,GeneID:428264,GeneID:419848,GeneID:107051274,GeneID:373958,GeneID:430017,GeneID:100858200
Indole alkaloid biosynthesis	ko00901	1	1	1	0.0223241	0.203543	GeneID:420947
Focal adhesion	ko04510	10	223	0.044843	0.0281269	0.241953	GeneID:424799,GeneID:771832,GeneID:395935,GeneID:396292,GeneID:100857227,GeneID:424797,GeneID:395260,GeneID:408035,GeneID:112533563,GeneID:396000
cAMP signaling pathway	ko04024	10	225	0.0444444	0.0296588	0.241953	GeneID:107050658,GeneID:112531337,GeneID:430746,GeneID:430071,GeneID:396144,GeneID:429280,GeneID:100859369,GeneID:420386,GeneID:417965,GeneID:427633
DNA replication	ko03030	3	38	0.0789474	0.0523162	0.387878	GeneID:112531412,novel.23232,GeneID:112531421
