# Supplementary figures and images for: Transcriptomic Analysis of the Spleen of Different Chicken Breeds Revealed the Differential Resistance of Salmonella Typhimurium
Source: MDPI journal article supplement (doi:10.3390/genes13050811), 2022-05-02

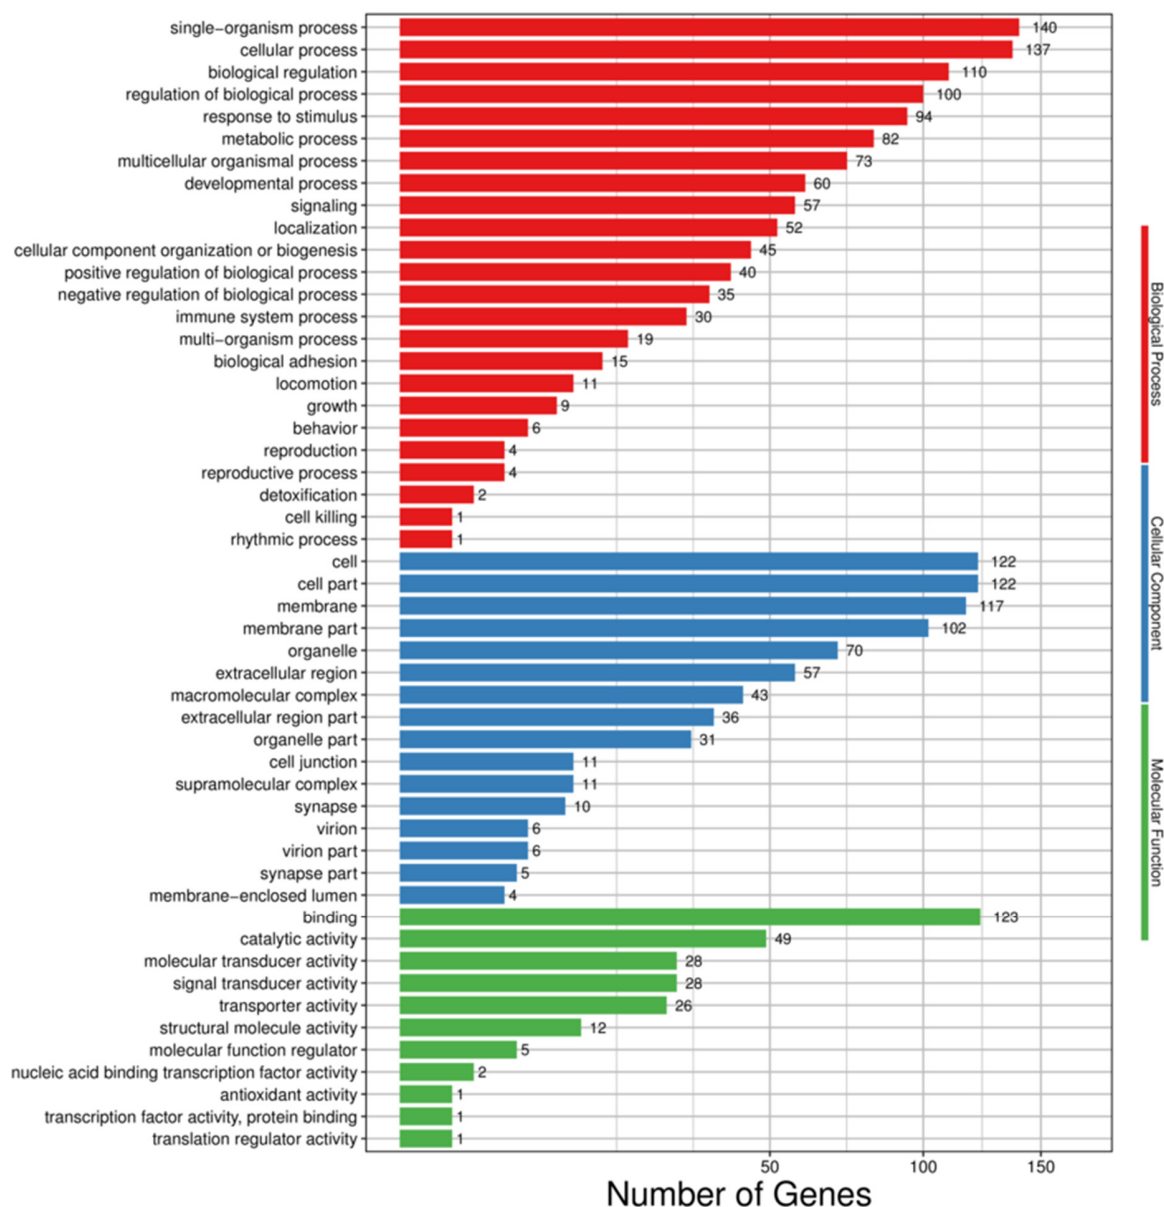

**Figure S1.** The enriched GO terms based on the DEGs identified in BY and Cobb.

Supplement: s1 [file s1]
